# Supplementary material
Source: Royal Society of Chemistry journal article supplement (doi:10.1039/d6ob00685j)

## Hypervalent Iodine-Mediated Cyclization of *N*-Vinyl Amides for the Synthesis of 4-Functionalized Dihydrooxazolines

Jiwoo Lee<sup>§,a</sup>, Suhui Kim<sup>§,a</sup>, Chang Sung Hong<sup>§,c</sup>, Bomcha Park<sup>b</sup>, Yeong-Joon Kim<sup>c,\*</sup>, Sungwook Choi<sup>b,\*</sup>,  
and Ki Bum Hong<sup>a,\*</sup>

<sup>a</sup>New Drug Development Center, Daegu-Gyeongbuk Medical Innovation Foundation, Daegu 41061, Korea.  
Email: kbhong@kmedihub.re.kr.

<sup>b</sup>Department of New Drug Discovery and Development, Chungnam National University, Daejeon 34134,  
Korea; email: swchoi2010@cnu.ac.kr.

<sup>c</sup>Department of Chemistry, Chungnam National University, Daejeon 34134, Korea; email: y2kim@cnu.ac.kr.

### S-II-X

|                                                                 |    |
|-----------------------------------------------------------------|----|
| Figure 1. <sup>1</sup> H NMR (CDCl <sub>3</sub> ) of 3a .....   | 3  |
| Figure 2. <sup>13</sup> C NMR (CDCl <sub>3</sub> ) of 3a .....  | 4  |
| Figure 3. <sup>19</sup> F NMR (CDCl <sub>3</sub> ) of 3a .....  | 5  |
| Figure 4. <sup>1</sup> H NMR (CDCl <sub>3</sub> ) of 3b .....   | 6  |
| Figure 5. <sup>13</sup> C NMR (CDCl <sub>3</sub> ) of 3b .....  | 7  |
| Figure 6. <sup>1</sup> H NMR (CDCl <sub>3</sub> ) of 3c .....   | 8  |
| Figure 7. <sup>13</sup> C NMR (CDCl <sub>3</sub> ) of 3c .....  | 9  |
| Figure 8. <sup>1</sup> H NMR (CDCl <sub>3</sub> ) of 3d .....   | 10 |
| Figure 9. <sup>13</sup> C NMR (CDCl <sub>3</sub> ) of 3d .....  | 11 |
| Figure 10. <sup>19</sup> F NMR (CDCl <sub>3</sub> ) of 3d ..... | 12 |
| Figure 11. <sup>1</sup> H NMR (CDCl <sub>3</sub> ) of 3e .....  | 13 |
| Figure 12. <sup>13</sup> C NMR (CDCl <sub>3</sub> ) of 3e ..... | 14 |
| Figure 13. <sup>1</sup> H NMR (CDCl <sub>3</sub> ) of 3f .....  | 15 |
| Figure 14. <sup>13</sup> C NMR (CDCl <sub>3</sub> ) of 3f ..... | 16 |
| Figure 15. <sup>19</sup> F NMR (CDCl <sub>3</sub> ) of 3f ..... | 17 |
| Figure 16. <sup>1</sup> H NMR (CDCl <sub>3</sub> ) of 3g .....  | 18 |
| Figure 17. <sup>13</sup> C NMR (CDCl <sub>3</sub> ) of 3g ..... | 19 |
| Figure 18. <sup>1</sup> H NMR (CDCl <sub>3</sub> ) of 3h .....  | 20 |
| Figure 19. <sup>13</sup> C NMR (CDCl <sub>3</sub> ) of 3h ..... | 21 |
| Figure 20. <sup>1</sup> H NMR (CDCl <sub>3</sub> ) of 3i .....  | 22 |
| Figure 21. <sup>13</sup> C NMR (CDCl <sub>3</sub> ) of 3i ..... | 23 |
| Figure 22. <sup>1</sup> H NMR (CDCl <sub>3</sub> ) of 3j .....  | 24 |
| Figure 23. <sup>13</sup> C NMR (CDCl <sub>3</sub> ) of 3j ..... | 25 |
| Figure 24. <sup>19</sup> F NMR (CDCl <sub>3</sub> ) of 3j ..... | 26 |
| Figure 25. <sup>1</sup> H NMR (CDCl <sub>3</sub> ) of 3k .....  | 27 |
| Figure 26. <sup>13</sup> C NMR (CDCl <sub>3</sub> ) of 3k ..... | 28 |
| Figure 27. <sup>1</sup> H NMR (CDCl <sub>3</sub> ) of 3l .....  | 29 |
| Figure 28. <sup>13</sup> C NMR (CDCl <sub>3</sub> ) of 3l ..... | 30 |
| Figure 29. <sup>1</sup> H NMR (CDCl <sub>3</sub> ) of 3m .....  | 31 |
| Figure 30. <sup>13</sup> C NMR (CDCl <sub>3</sub> ) of 3m ..... | 32 |
| Figure 31. <sup>1</sup> H NMR (CDCl <sub>3</sub> ) of 7a .....  | 33 |
| Figure 32. <sup>13</sup> C NMR (CDCl <sub>3</sub> ) of 7a ..... | 34 |
| Figure 33. <sup>19</sup> F NMR (CDCl <sub>3</sub> ) of 7a ..... | 35 |
| Figure 34. <sup>1</sup> H NMR (CDCl <sub>3</sub> ) of 7c .....  | 36 |

|                                                                  |    |
|------------------------------------------------------------------|----|
| Figure 35. $^{13}\text{C}$ NMR ( $\text{CDCl}_3$ ) of 7c .....   | 37 |
| Figure 36. $^1\text{H}$ NMR ( $\text{CDCl}_3$ ) of 7e .....      | 38 |
| Figure 37. $^{13}\text{C}$ NMR ( $\text{CDCl}_3$ ) of 7e .....   | 39 |
| Figure 38. $^1\text{H}$ NMR ( $\text{CDCl}_3$ ) of 7h .....      | 40 |
| Figure 39. $^{13}\text{C}$ NMR ( $\text{CDCl}_3$ ) of 7h .....   | 41 |
| Figure 41. $^{13}\text{C}$ NMR ( $\text{CDCl}_3$ ) of 7l .....   | 43 |
| Figure 42. $^1\text{H}$ NMR ( $\text{CDCl}_3$ ) of 7m .....      | 44 |
| Figure 43. $^{13}\text{C}$ NMR ( $\text{CDCl}_3$ ) of 7m .....   | 45 |
| Figure 44. $^1\text{H}$ NMR ( $\text{DMSO}-d_6$ ) of 8a .....    | 46 |
| Figure 45. $^{13}\text{C}$ NMR ( $\text{DMSO}-d_6$ ) of 8a ..... | 47 |
| Figure 46. $^{19}\text{F}$ NMR ( $\text{DMSO}-d_6$ ) of 8a ..... | 48 |
| Figure 47. $^1\text{H}$ NMR ( $\text{DMSO}-d_6$ ) of 8b .....    | 49 |
| Figure 48. $^{13}\text{C}$ NMR ( $\text{DMSO}-d_6$ ) of 8b ..... | 50 |
| Figure 49. $^1\text{H}$ NMR ( $\text{MeOD}-d_4$ ) of 8l .....    | 51 |
| Figure 50. $^{13}\text{C}$ NMR ( $\text{MeOD}-d_4$ ) of 8l ..... | 52 |
| Figure 51. $^1\text{H}$ NMR ( $\text{DMSO}-d_6$ ) of 9c .....    | 53 |
| Figure 52. $^{13}\text{C}$ NMR ( $\text{DMSO}-d_6$ ) of 9c ..... | 54 |
| Figure 53. $^1\text{H}$ NMR ( $\text{CDCl}_3$ ) of 9e .....      | 55 |
| Figure 54. $^{13}\text{C}$ NMR ( $\text{CDCl}_3$ ) of 9e .....   | 56 |
| Figure 55. $^1\text{H}$ NMR ( $\text{CDCl}_3$ ) of 10a .....     | 57 |
| Figure 56. $^{13}\text{C}$ NMR ( $\text{CDCl}_3$ ) of 10a .....  | 58 |
| Figure 57. $^{19}\text{F}$ NMR ( $\text{CDCl}_3$ ) of 10a .....  | 59 |
| Figure 58. $^1\text{H}$ NMR ( $\text{CDCl}_3$ ) of 10b .....     | 60 |
| Figure 59. $^{13}\text{C}$ NMR ( $\text{CDCl}_3$ ) of 10b .....  | 61 |
| Figure 60. $^1\text{H}$ NMR ( $\text{CDCl}_3$ ) of 10c .....     | 62 |
| Figure 61. $^{13}\text{C}$ NMR ( $\text{CDCl}_3$ ) of 10c .....  | 63 |
| Figure 62. $^1\text{H}$ NMR ( $\text{CDCl}_3$ ) of 10d .....     | 64 |
| Figure 63. $^{13}\text{C}$ NMR ( $\text{CDCl}_3$ ) of 10d .....  | 65 |
| Figure 64. $^{19}\text{F}$ NMR ( $\text{CDCl}_3$ ) of 10d .....  | 66 |
| Figure 65. $^1\text{H}$ NMR ( $\text{CDCl}_3$ ) of 10g .....     | 67 |
| Figure 66. $^{13}\text{C}$ NMR ( $\text{CDCl}_3$ ) of 10g .....  | 68 |
| Figure 67. $^1\text{H}$ NMR ( $\text{CDCl}_3$ ) of 10i .....     | 69 |
| Figure 68. $^{13}\text{C}$ NMR ( $\text{CDCl}_3$ ) of 10i .....  | 70 |
| Figure 69. $^1\text{H}$ NMR ( $\text{CDCl}_3$ ) of 10j .....     | 71 |
| Figure 70. $^{13}\text{C}$ NMR ( $\text{CDCl}_3$ ) of 10j .....  | 72 |
| Figure 71. $^{19}\text{F}$ NMR ( $\text{CDCl}_3$ ) of 10j .....  | 73 |
| Figure 72. $^1\text{H}$ NMR ( $\text{CDCl}_3$ ) of 10l .....     | 74 |
| Figure 73. $^{13}\text{C}$ NMR ( $\text{CDCl}_3$ ) of 10l .....  | 75 |
| Figure 74. $^1\text{H}$ NMR ( $\text{CDCl}_3$ ) of 10m .....     | 76 |
| Figure 75. $^{13}\text{C}$ NMR ( $\text{CDCl}_3$ ) of 10m .....  | 77 |

Hong et al.

Figure 1.  $^1\text{H}$  NMR (

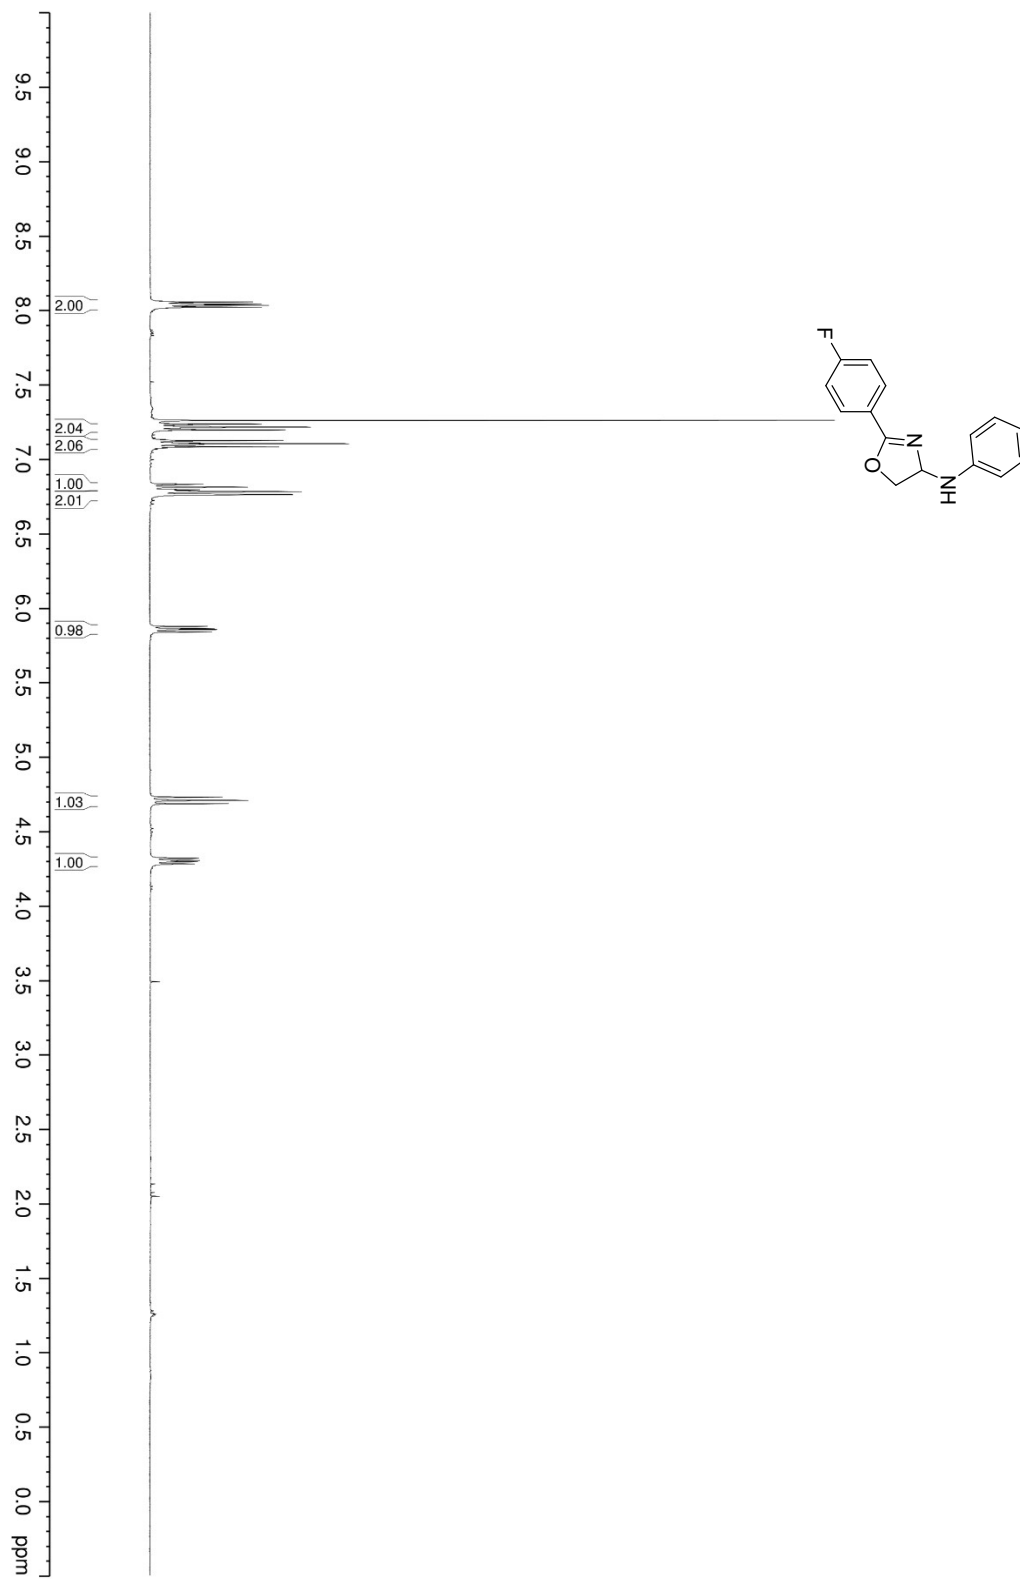

Hong et al.

Figure 2.  $^{13}\text{C}$  NMR

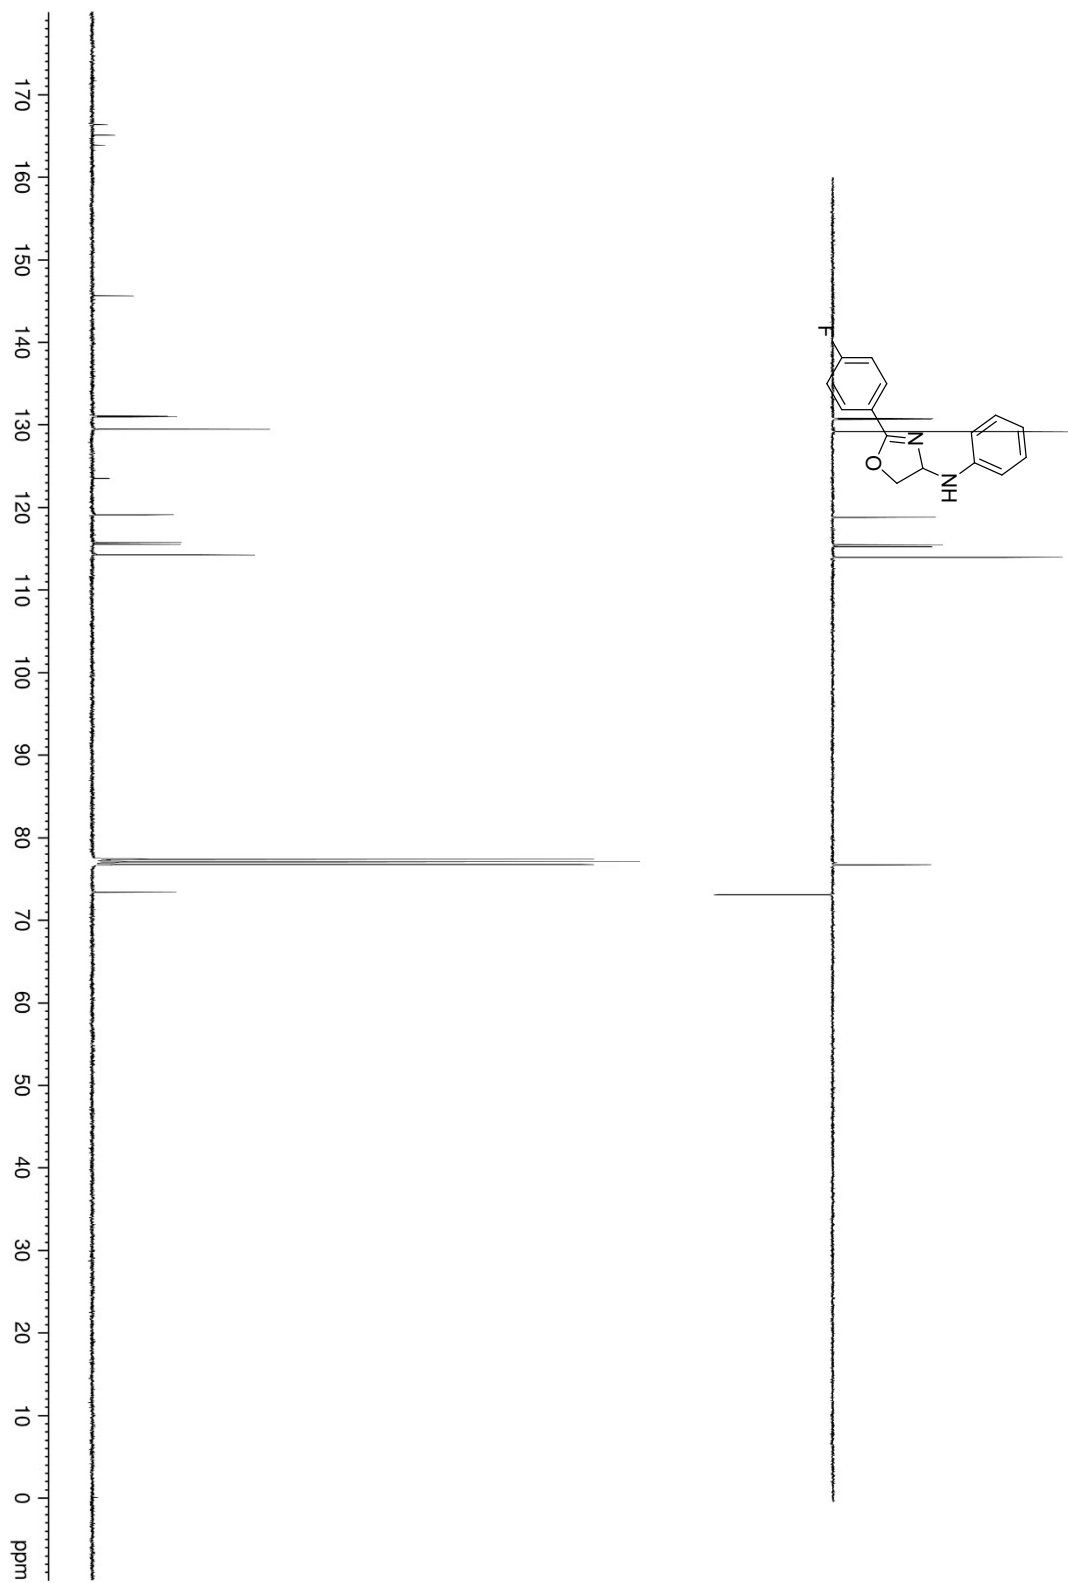

Hong et al.

Figure 3.  $^{19}\text{F}$  NMR

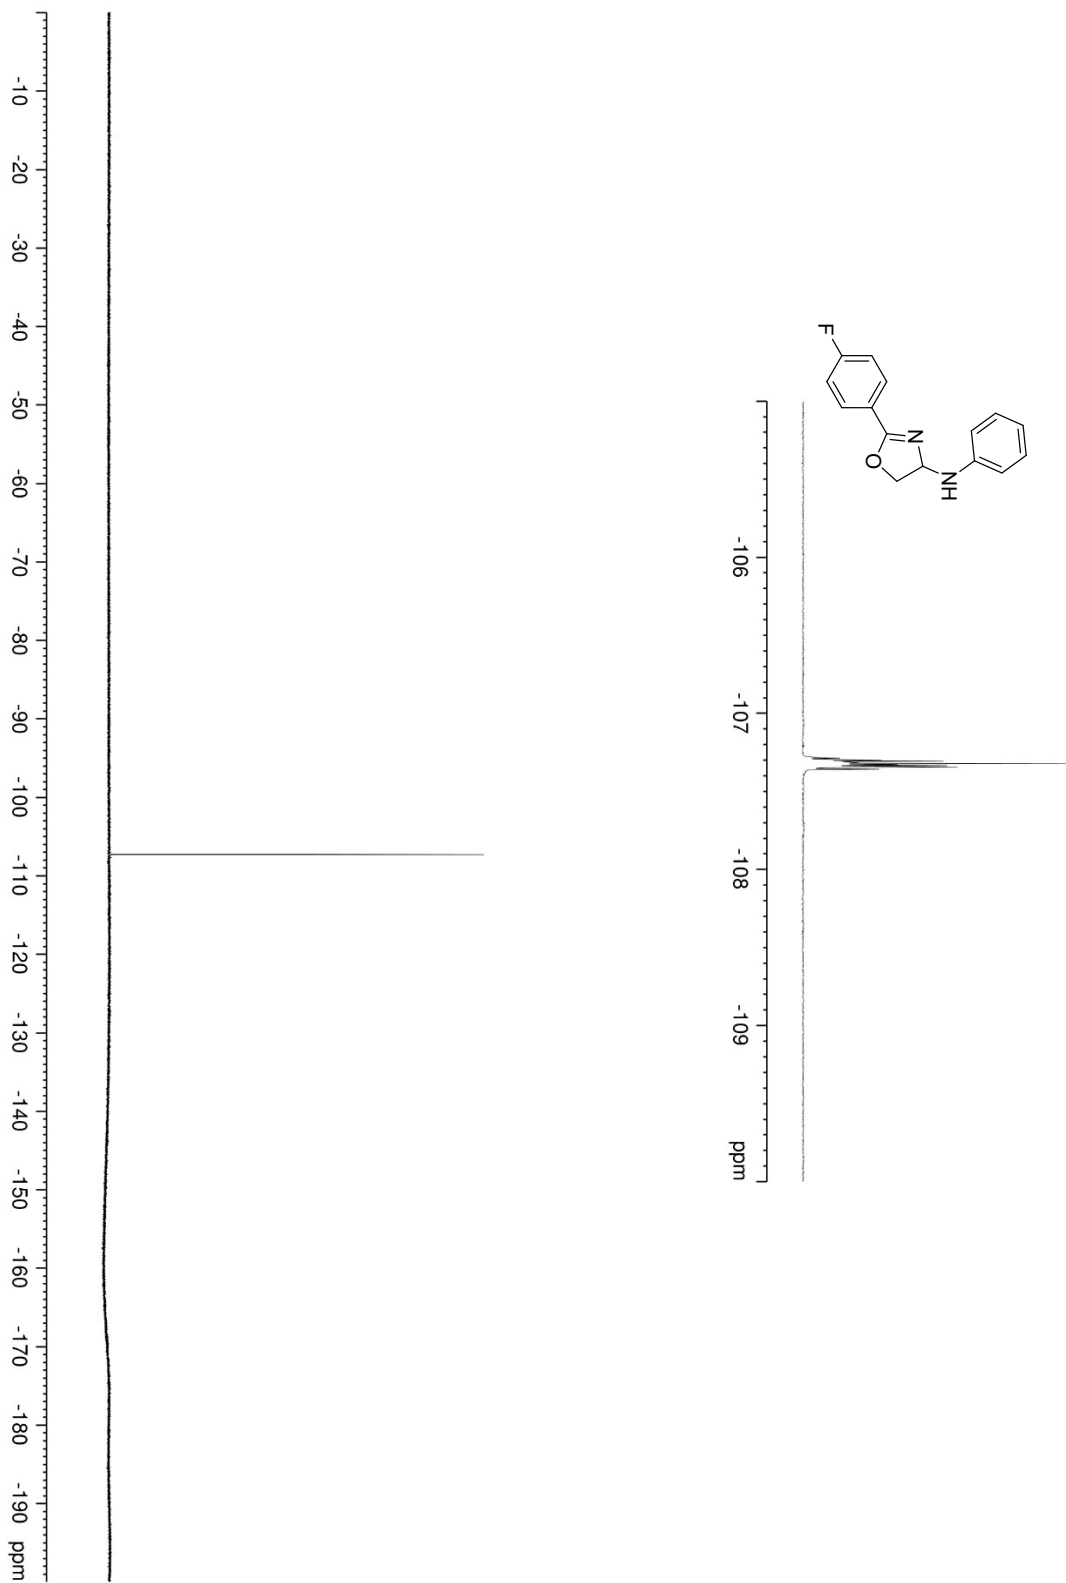

Hong et al.

Figure 4.  $^1\text{H}$  NMR (

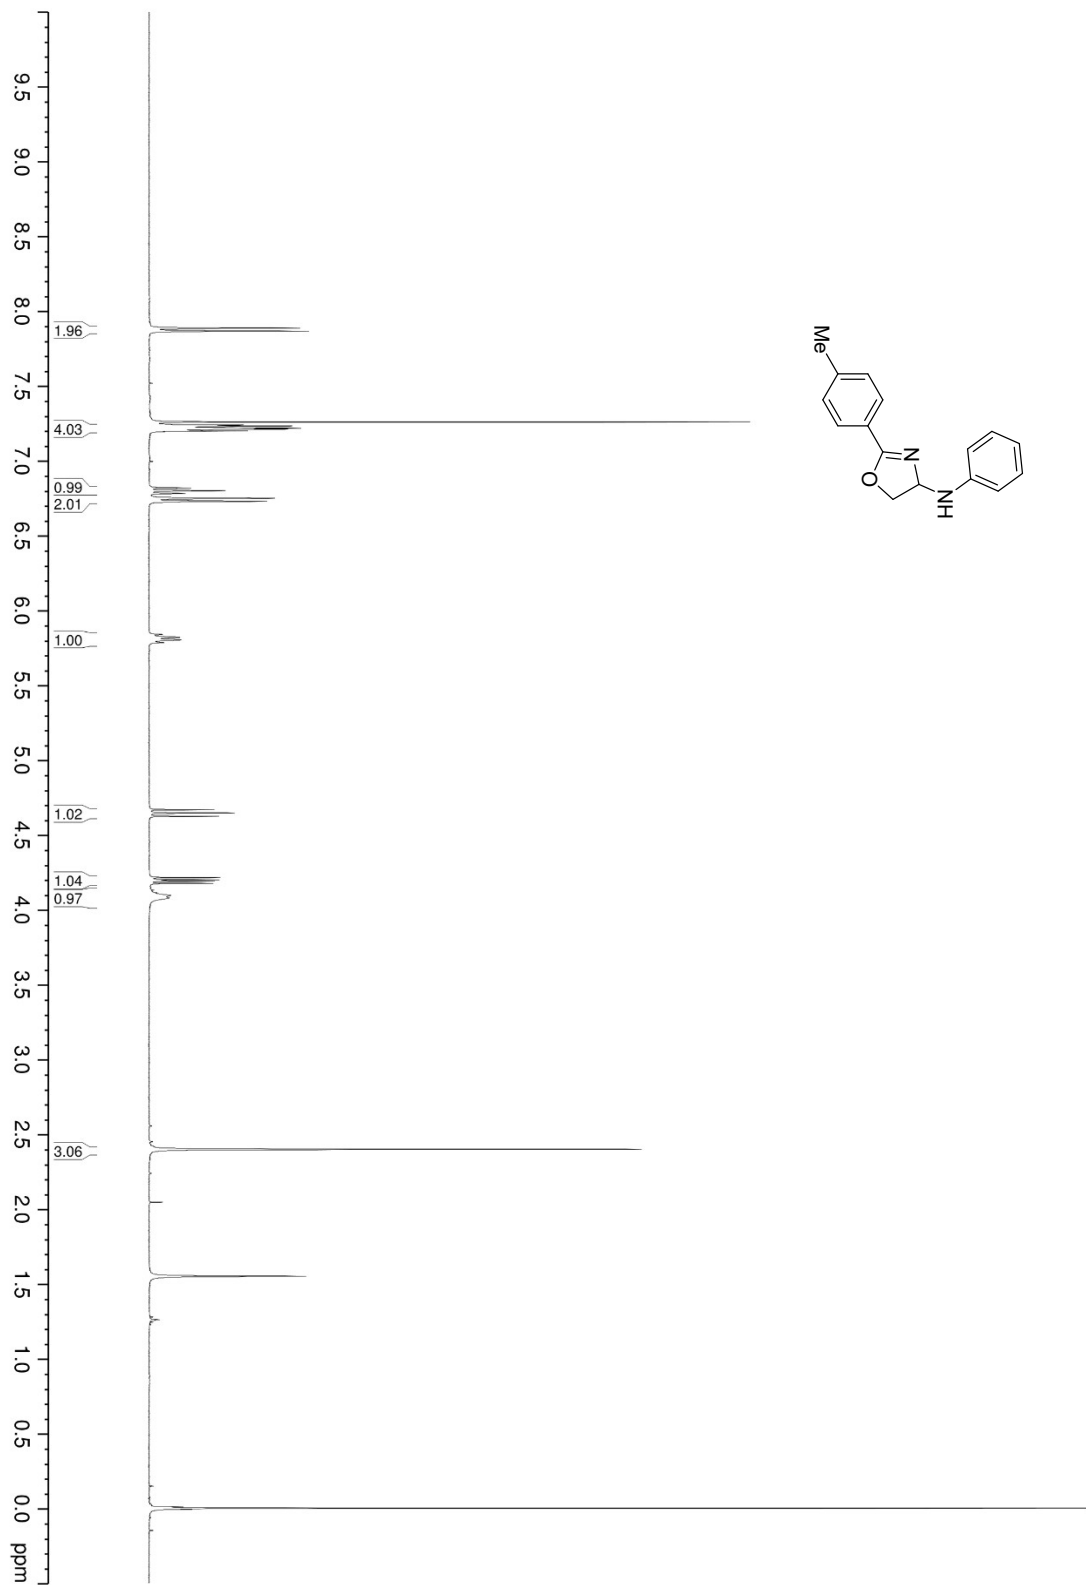

Hong et al.

Figure 5.  $^{13}\text{C}$  NMR

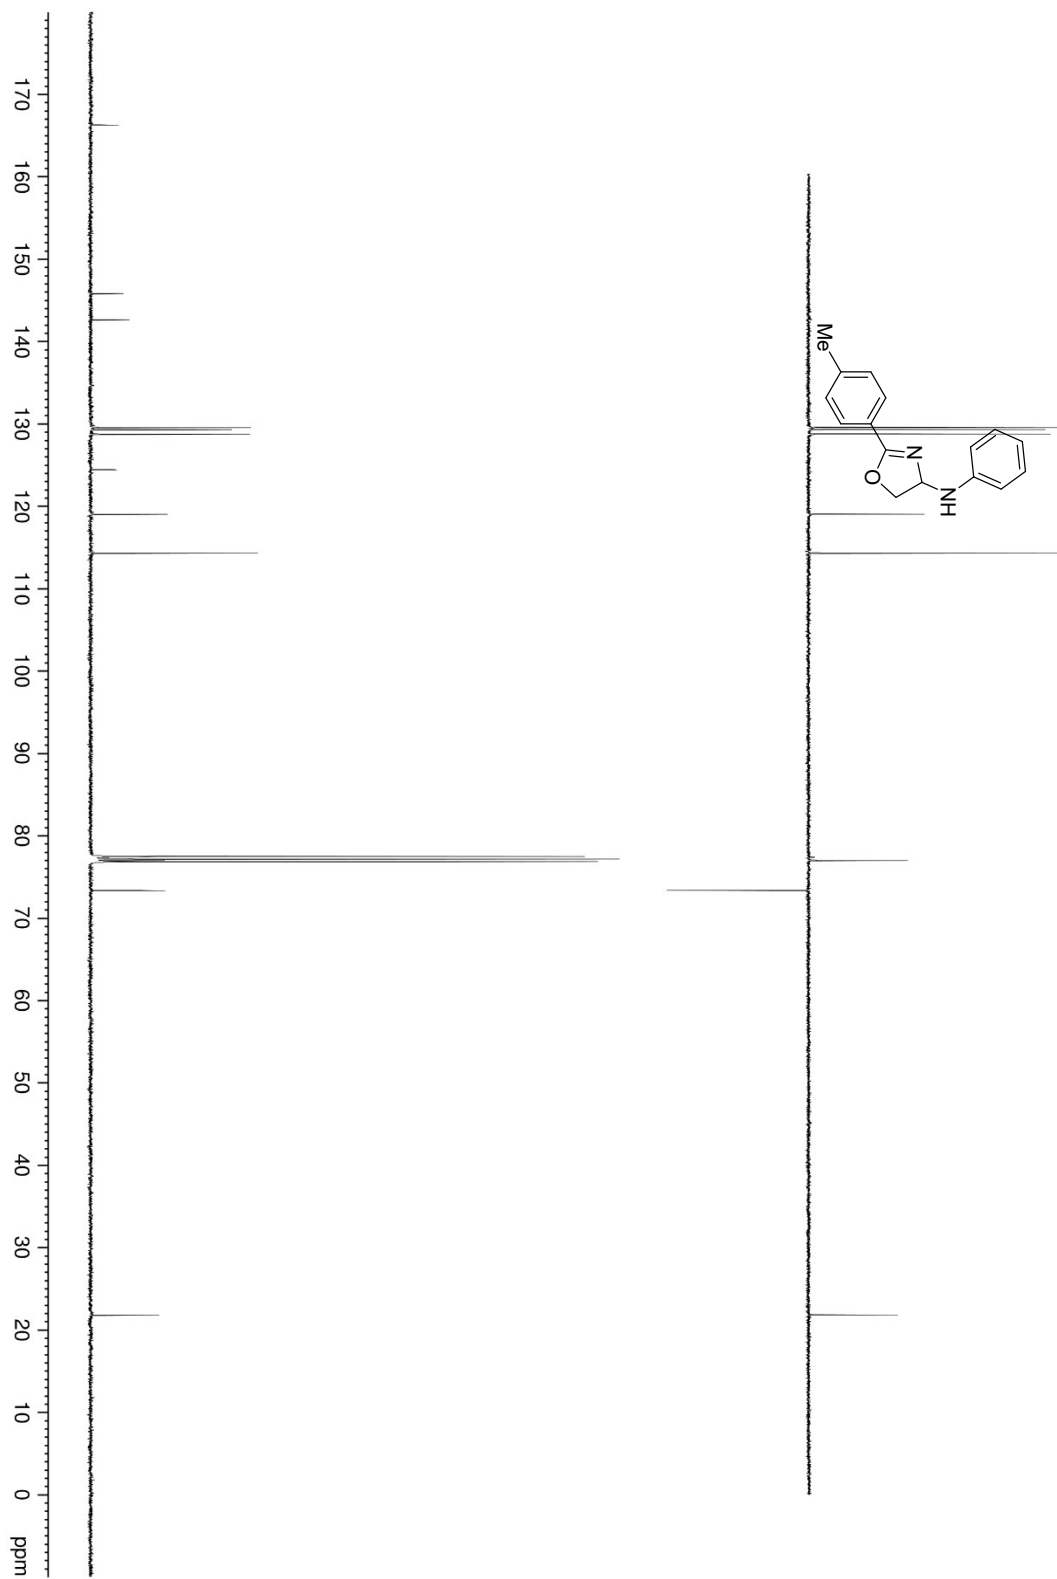

Hong et al.

Figure 6.  $^1\text{H}$  NMR (

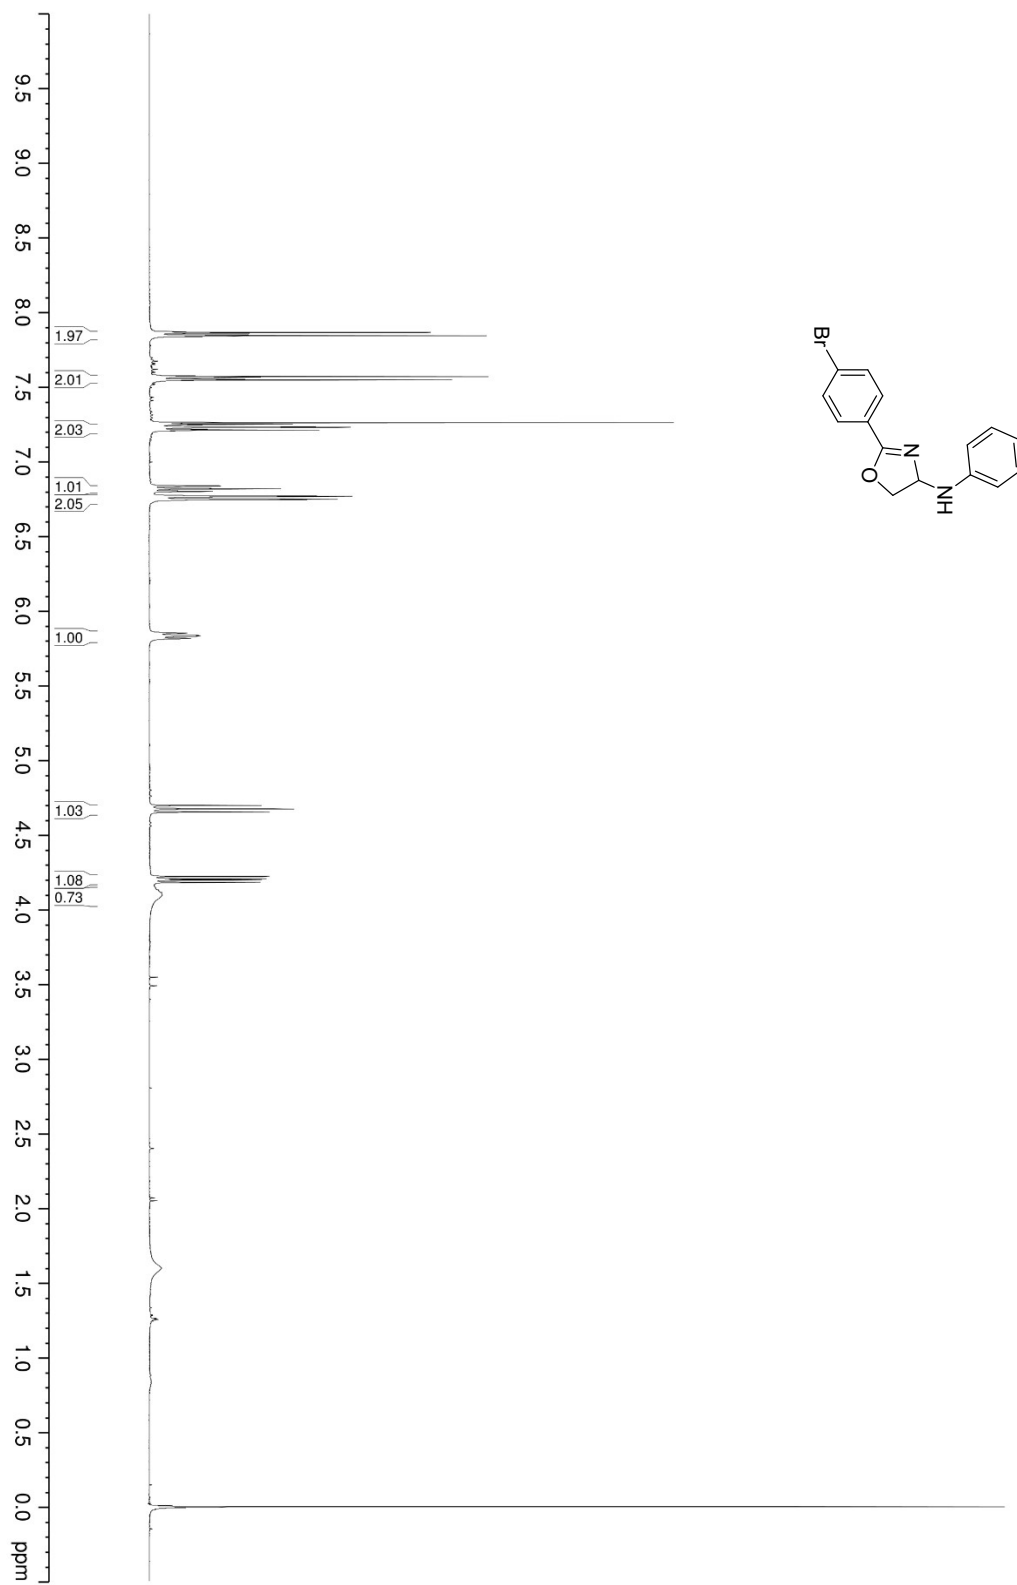

Hong et al.

Figure 7.  $^{13}\text{C}$  NMR

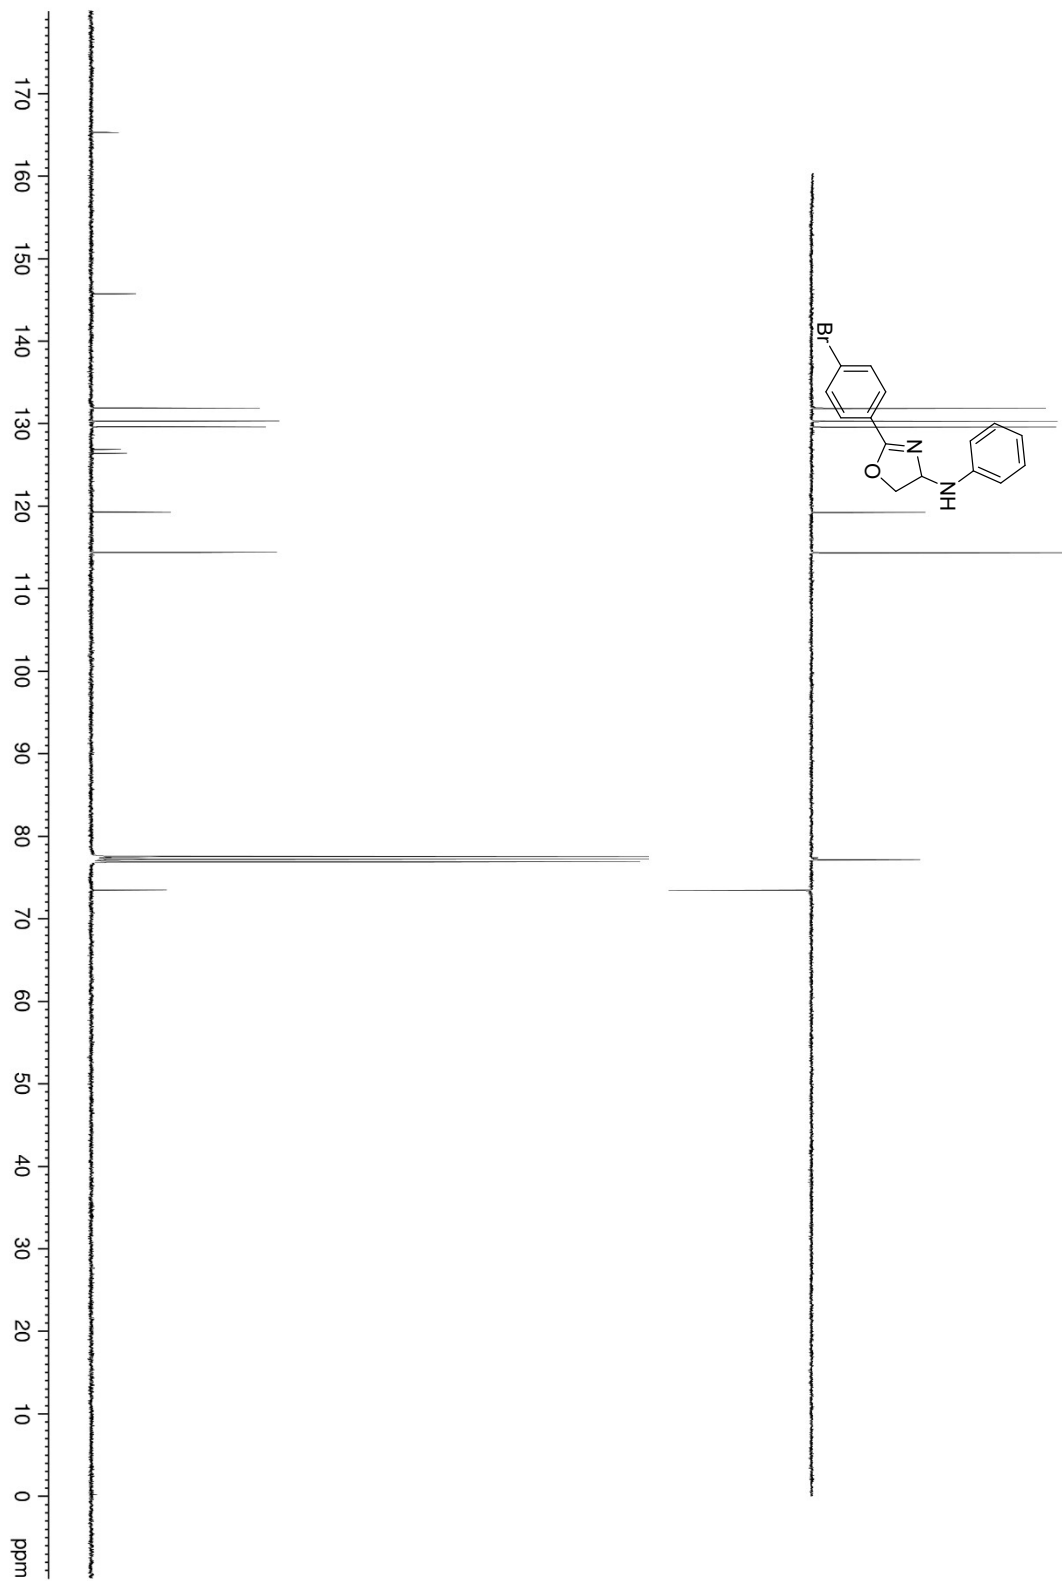

Hong et al.

Figure 8.  $^1\text{H}$  NMR (

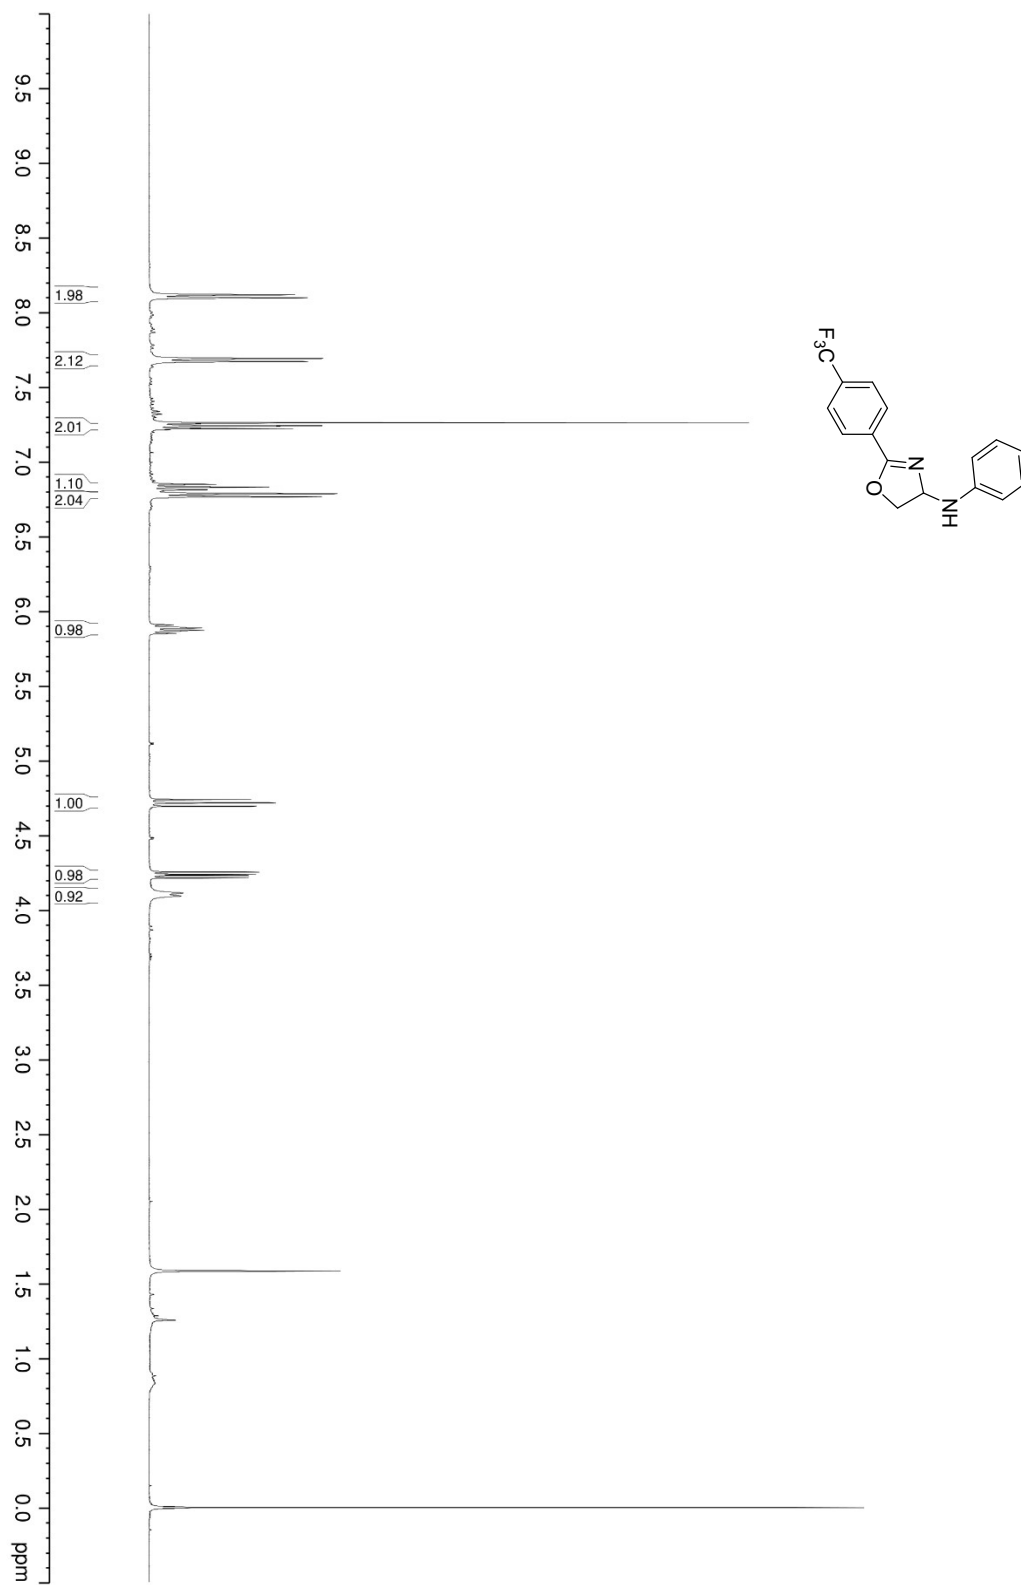

Hong et al.

Figure 9.  $^{13}\text{C}$  NMR

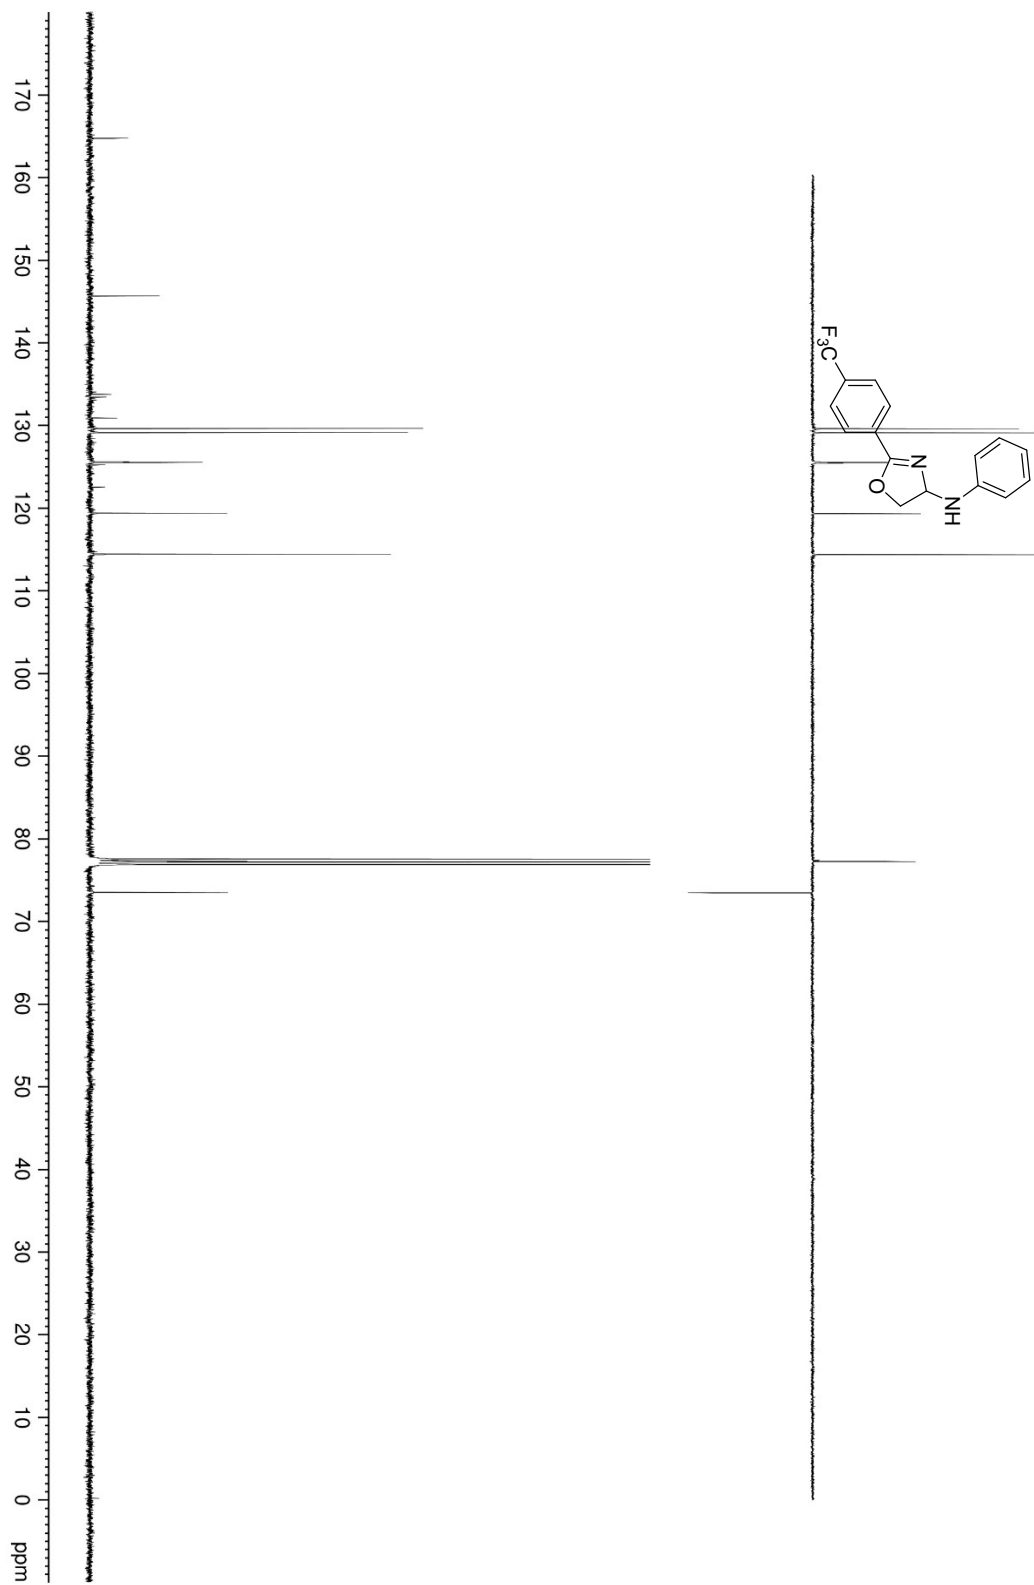

Hong et al.

Figure 10.  $^{19}\text{F}$  NMR

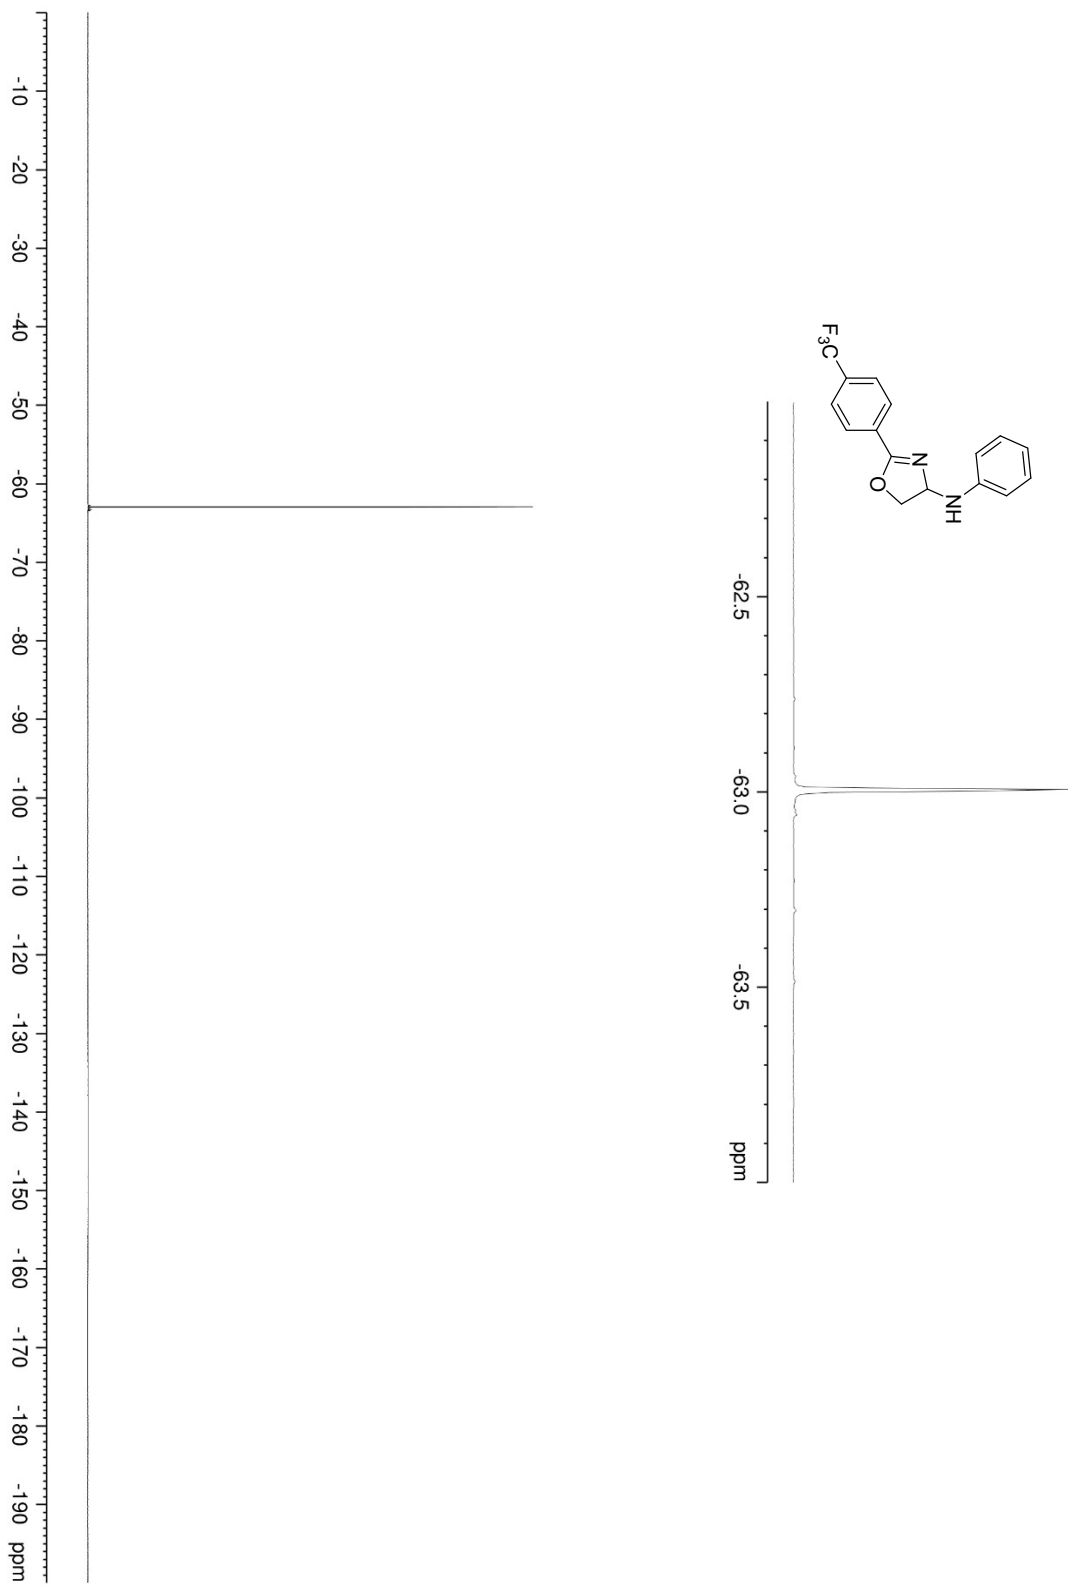

Hong et al.

Figure 11.  $^1\text{H}$  NMR

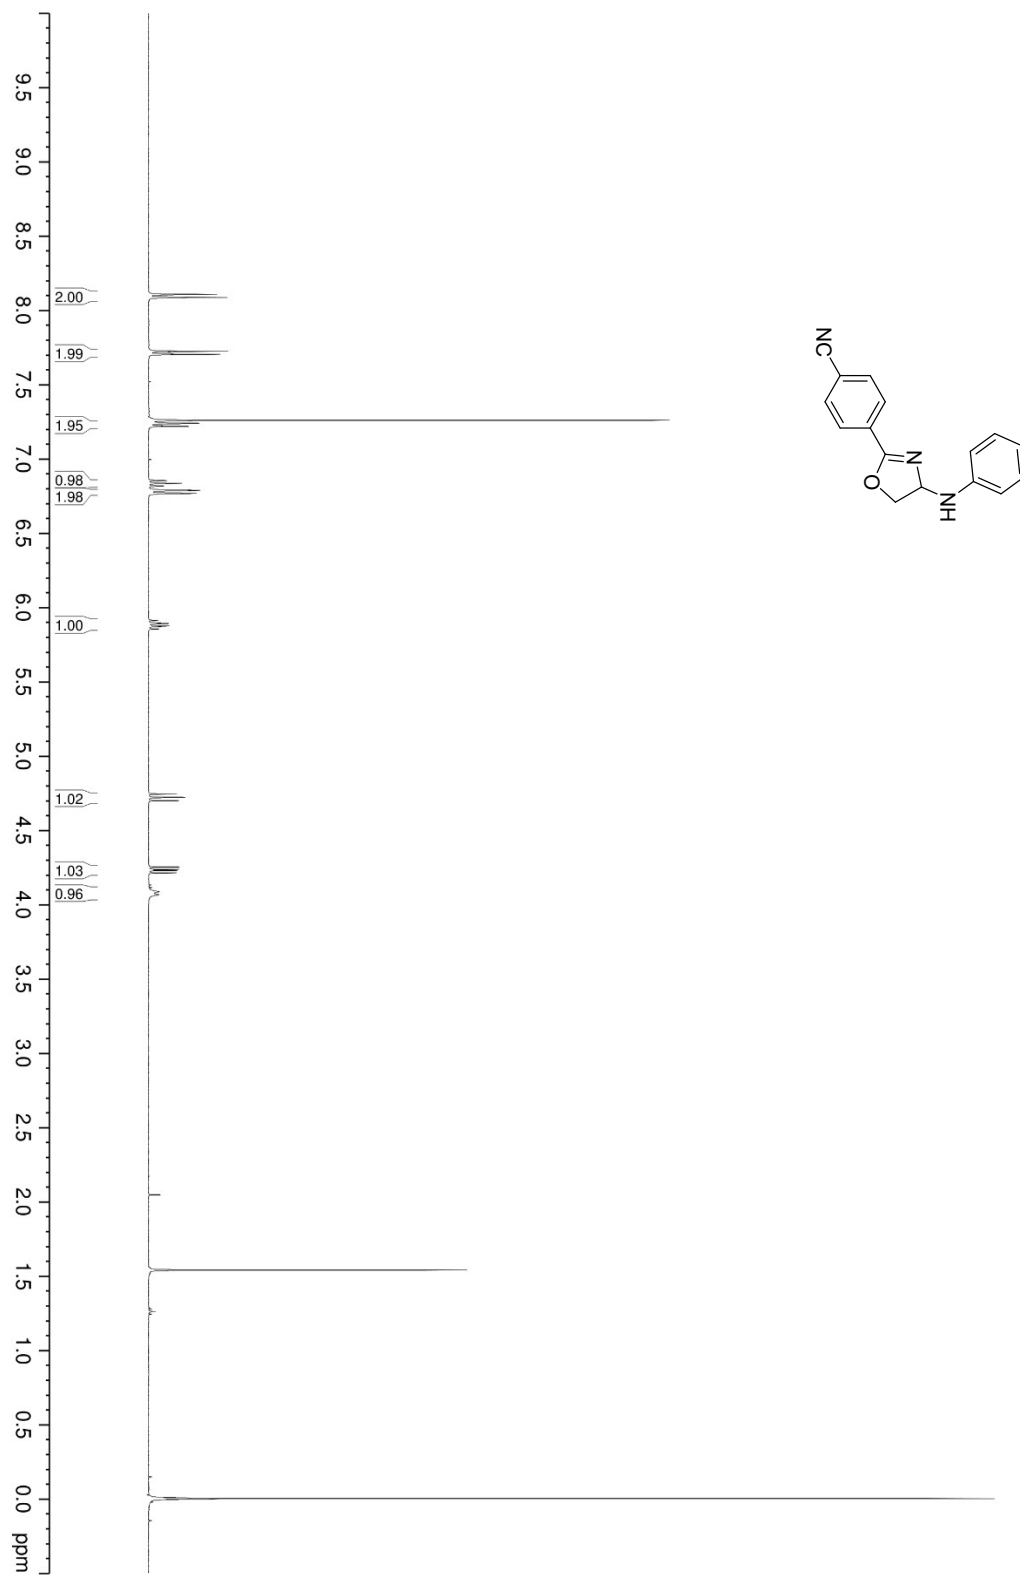

Hong et al.

Figure 12.  $^{13}\text{C}$  NMI

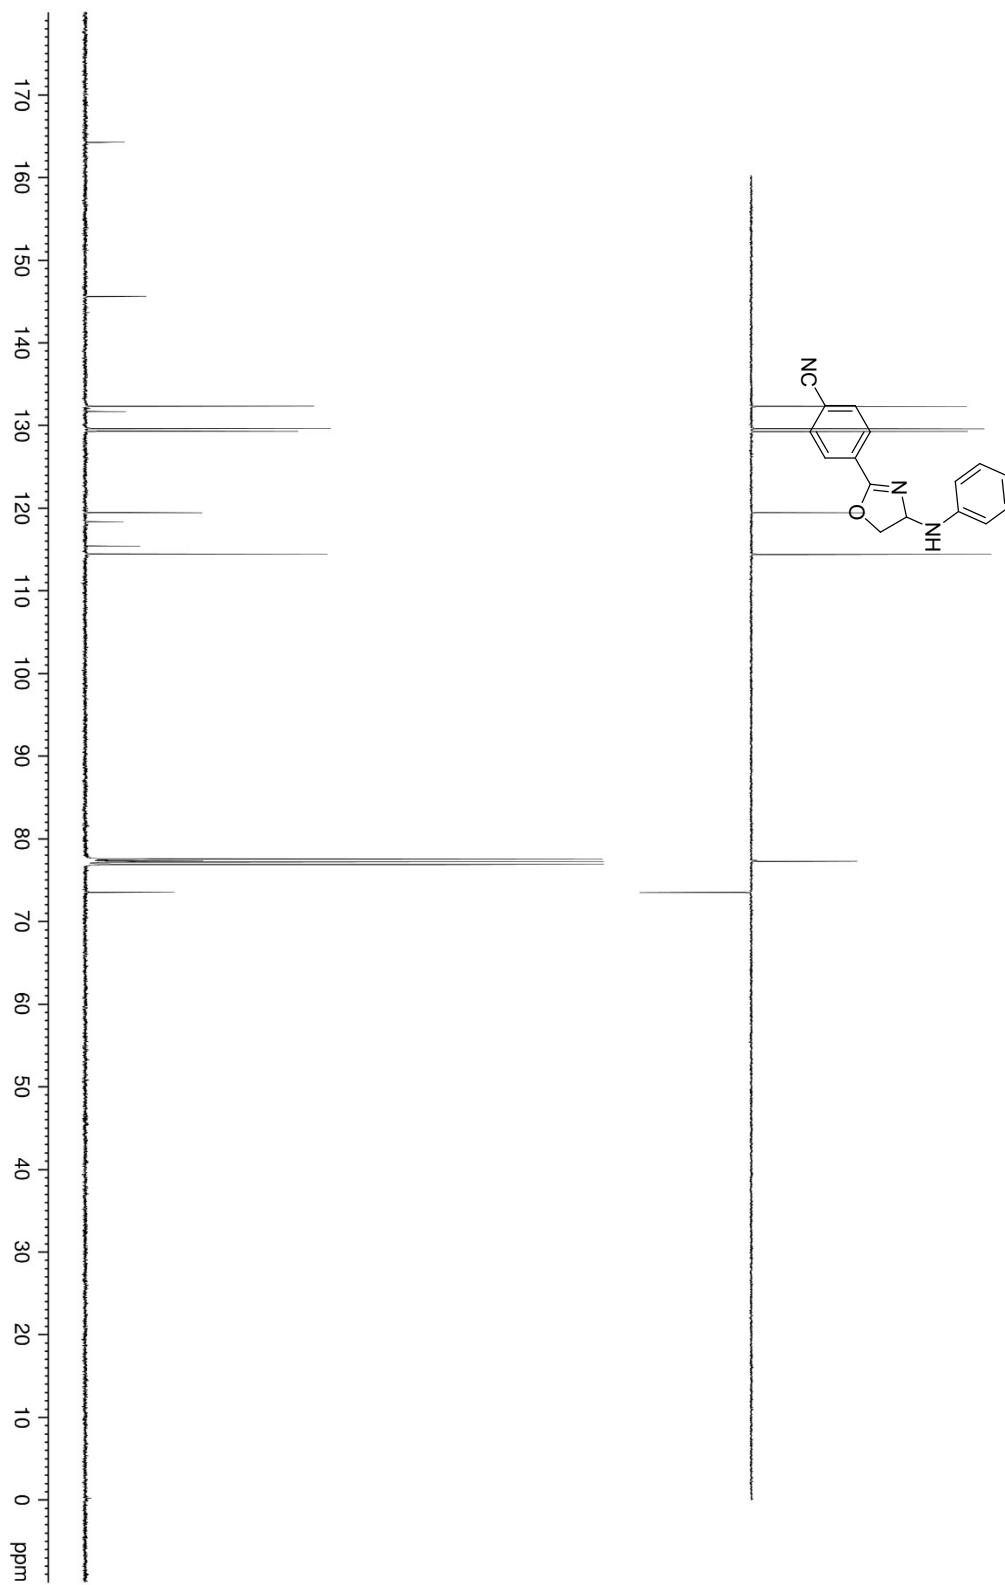

Hong et al.

Figure 13.  $^1\text{H}$  NMR

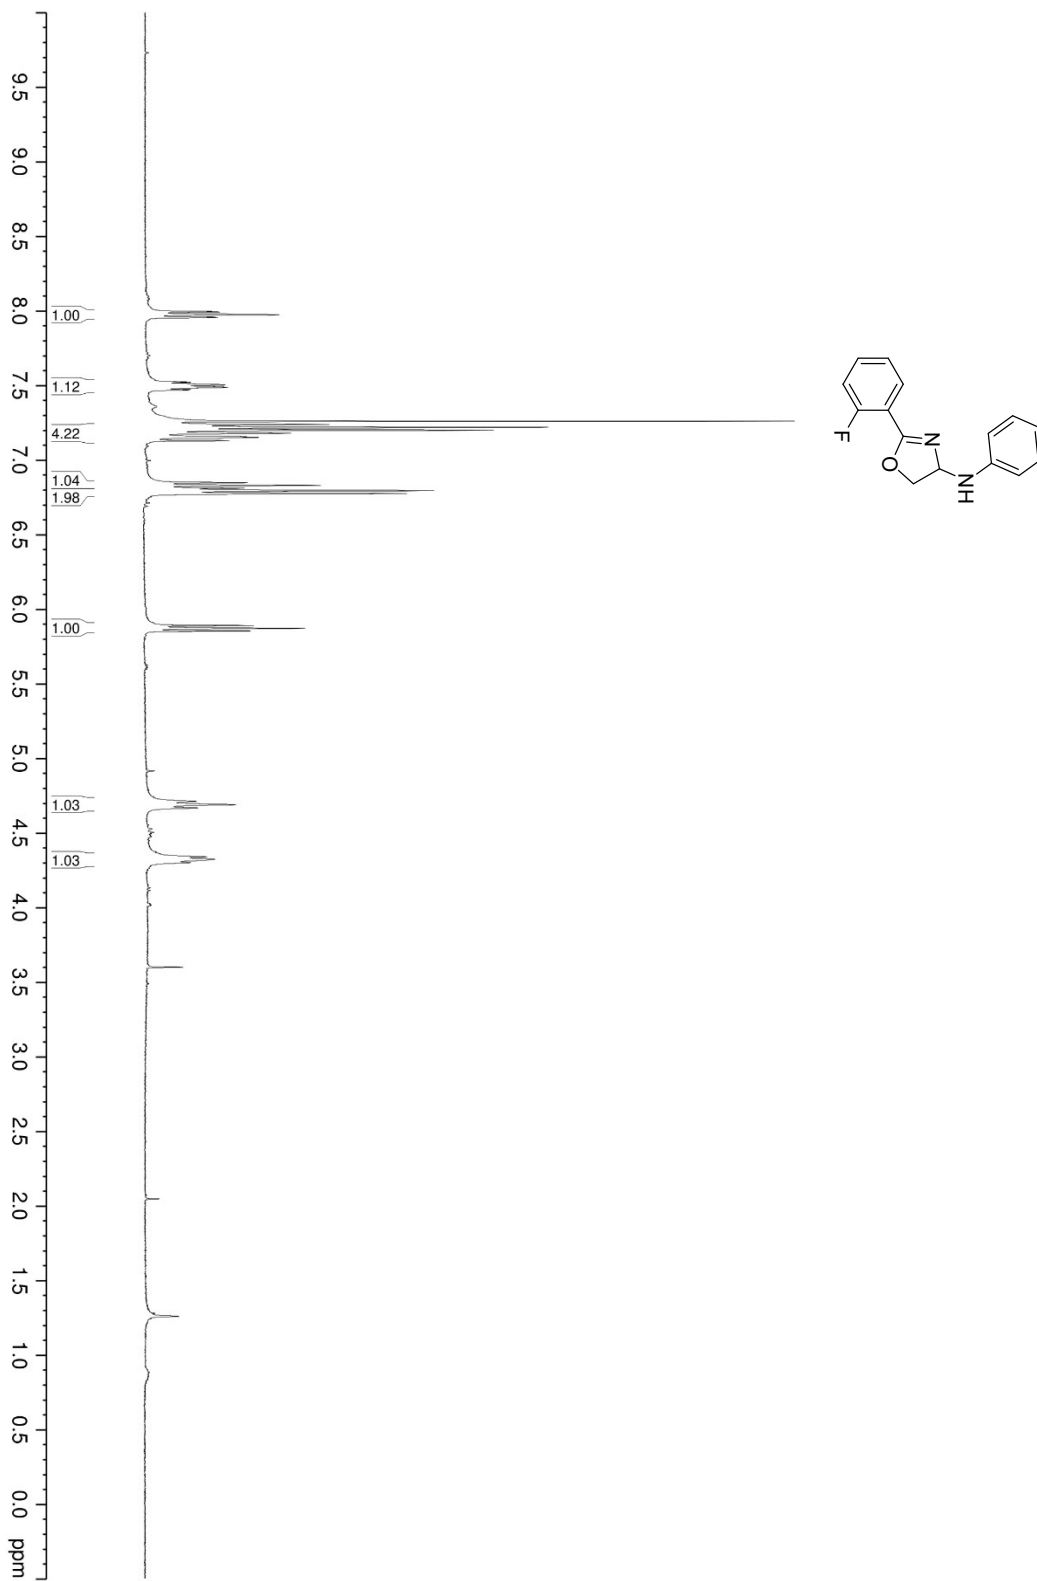

Hong et al.

Figure 14.  $^{13}\text{C}$  NMI

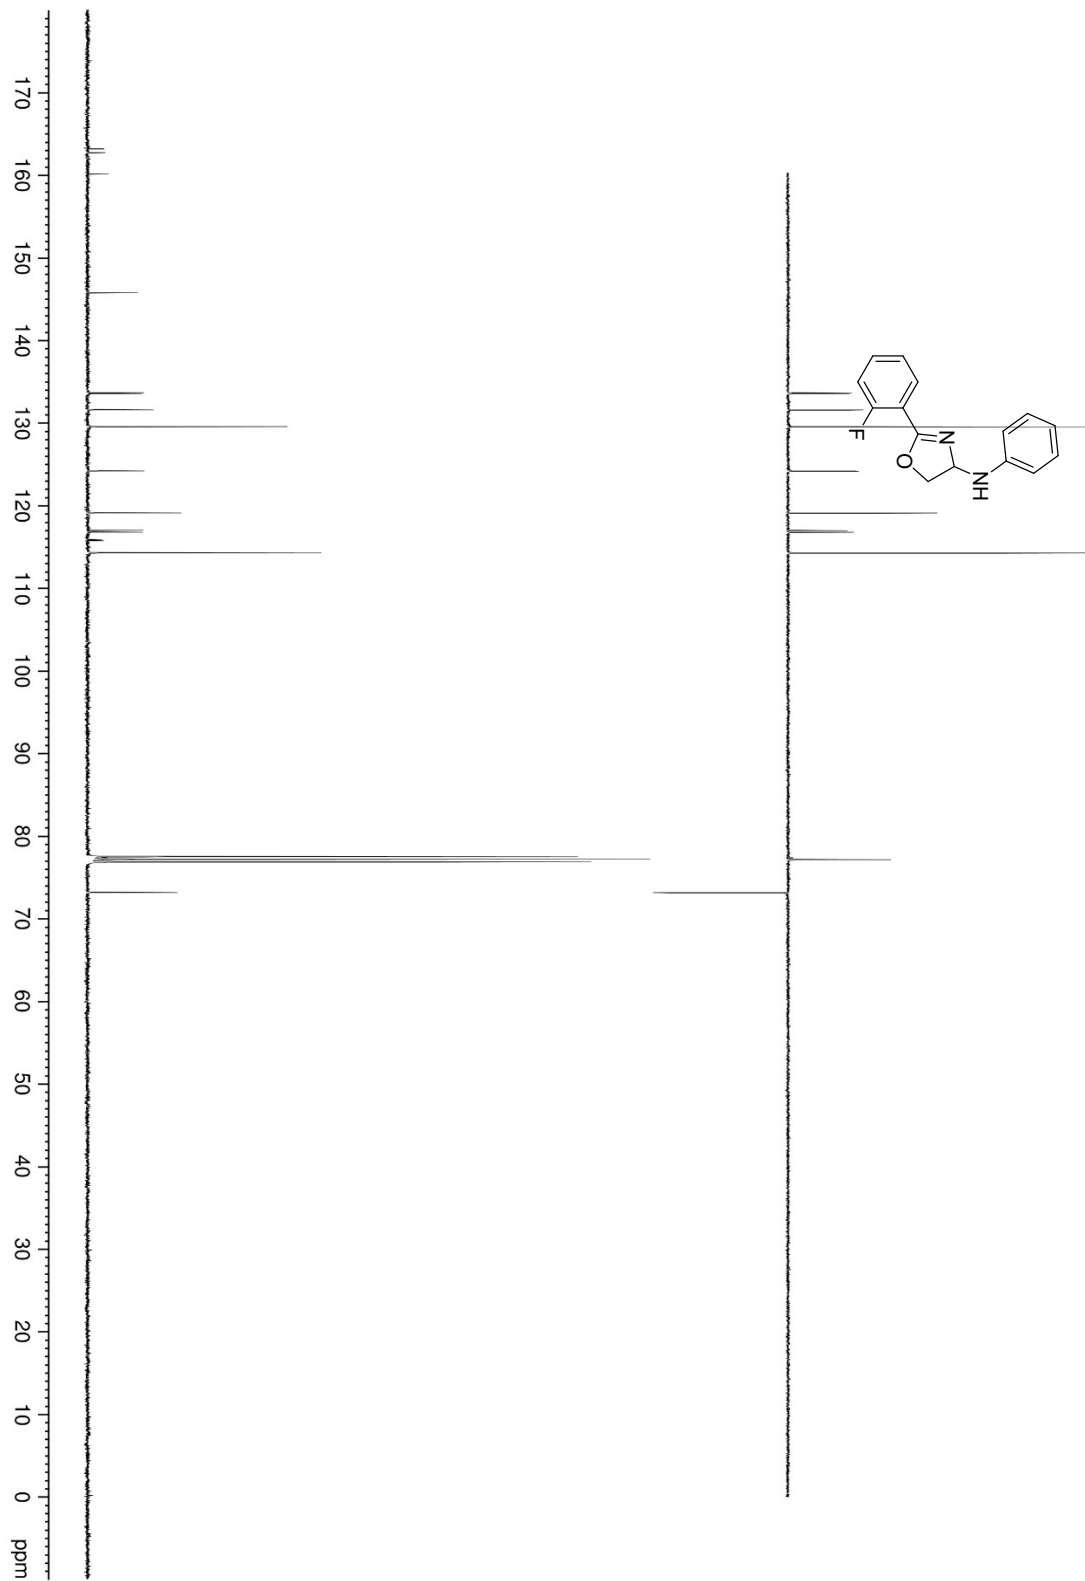

Hong et al.

Figure 15.  $^{19}\text{F}$  NMR

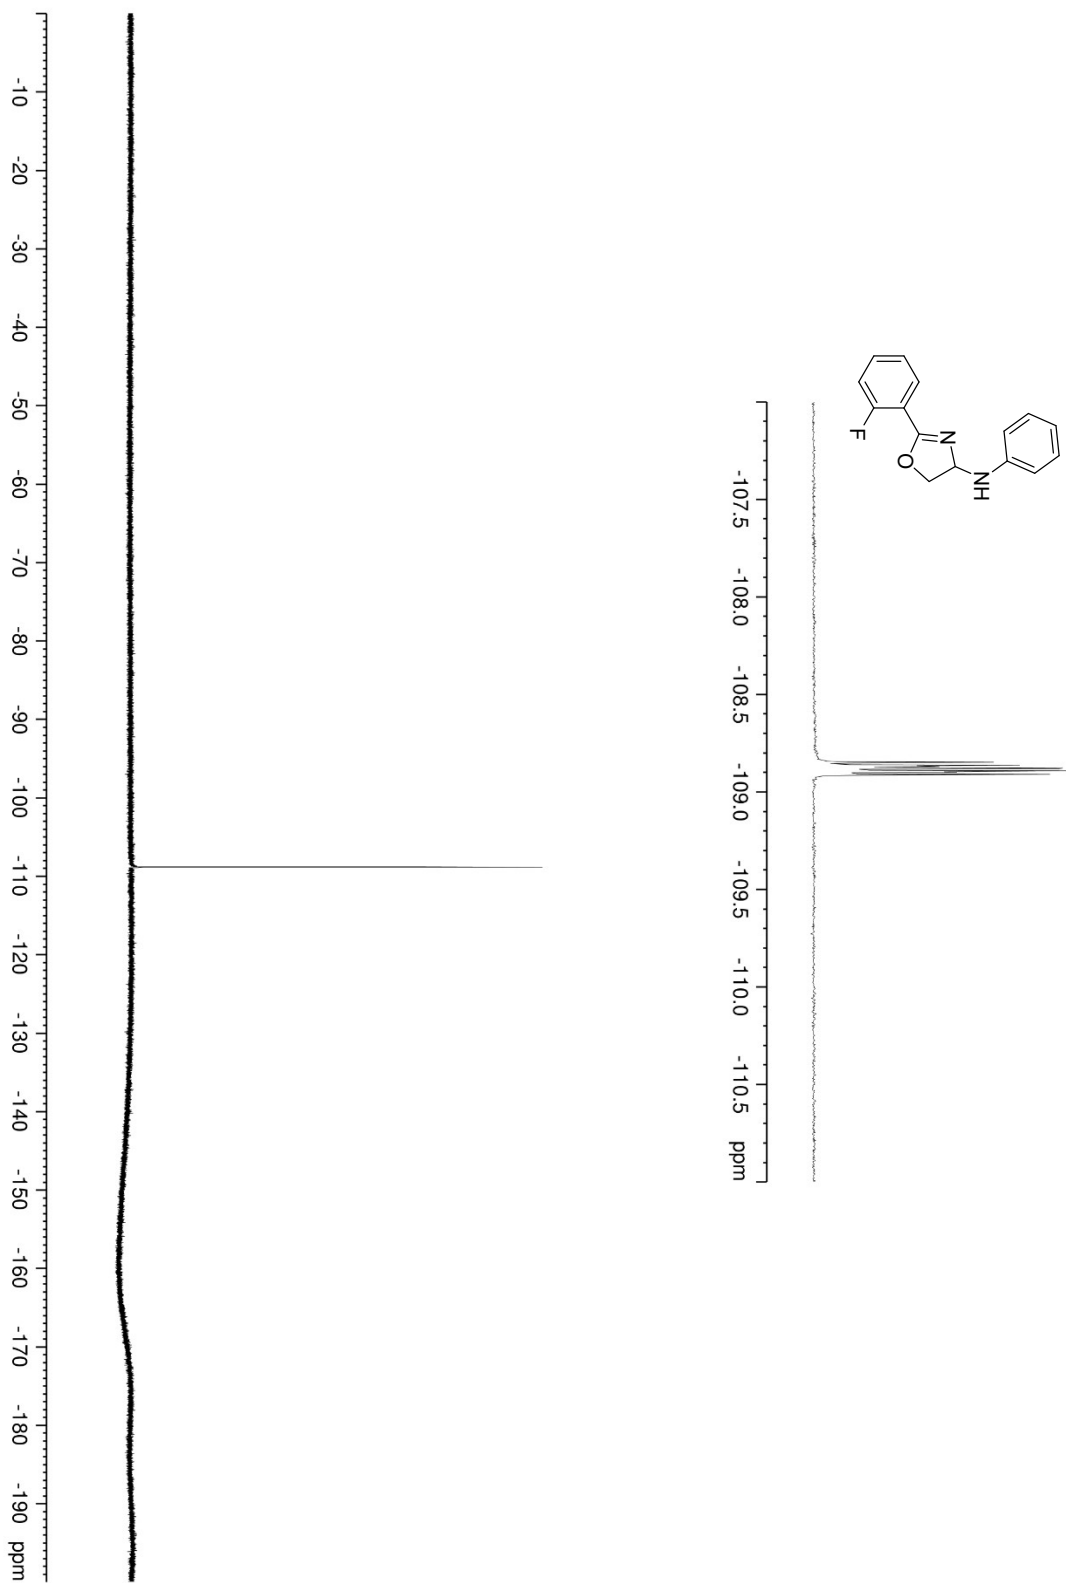

Hong et al.

Figure 16.  $^1\text{H}$  NMR

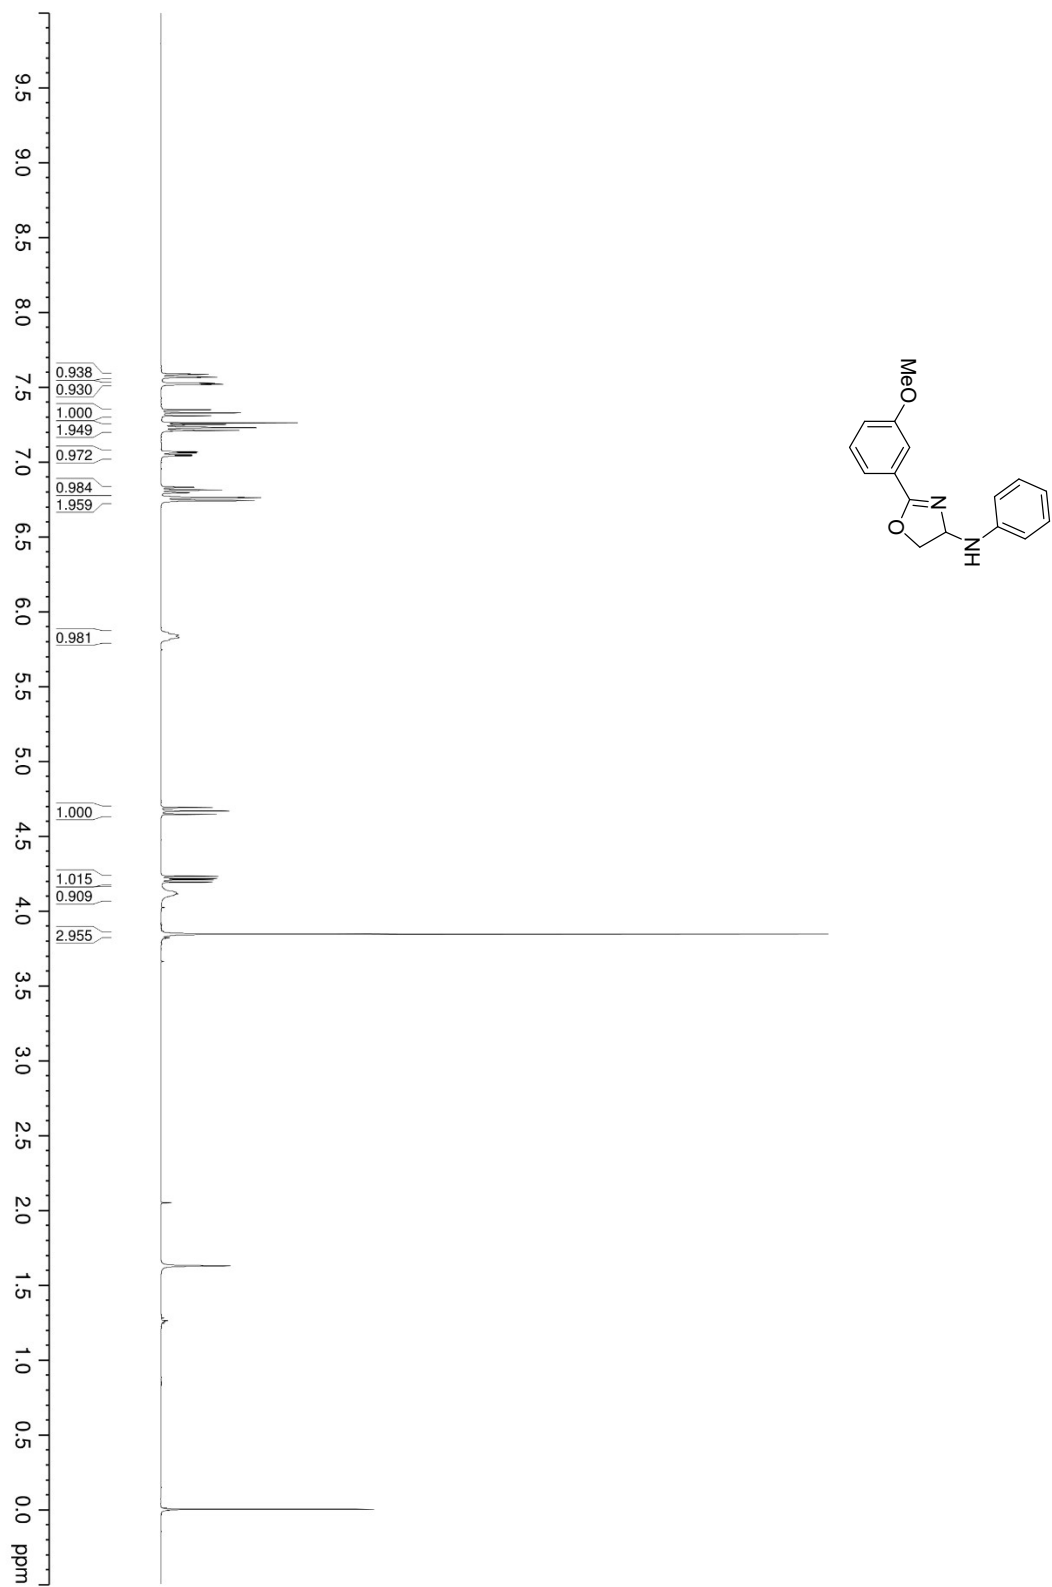

Hong et al.

Figure 17.  $^{13}\text{C}$  NMI

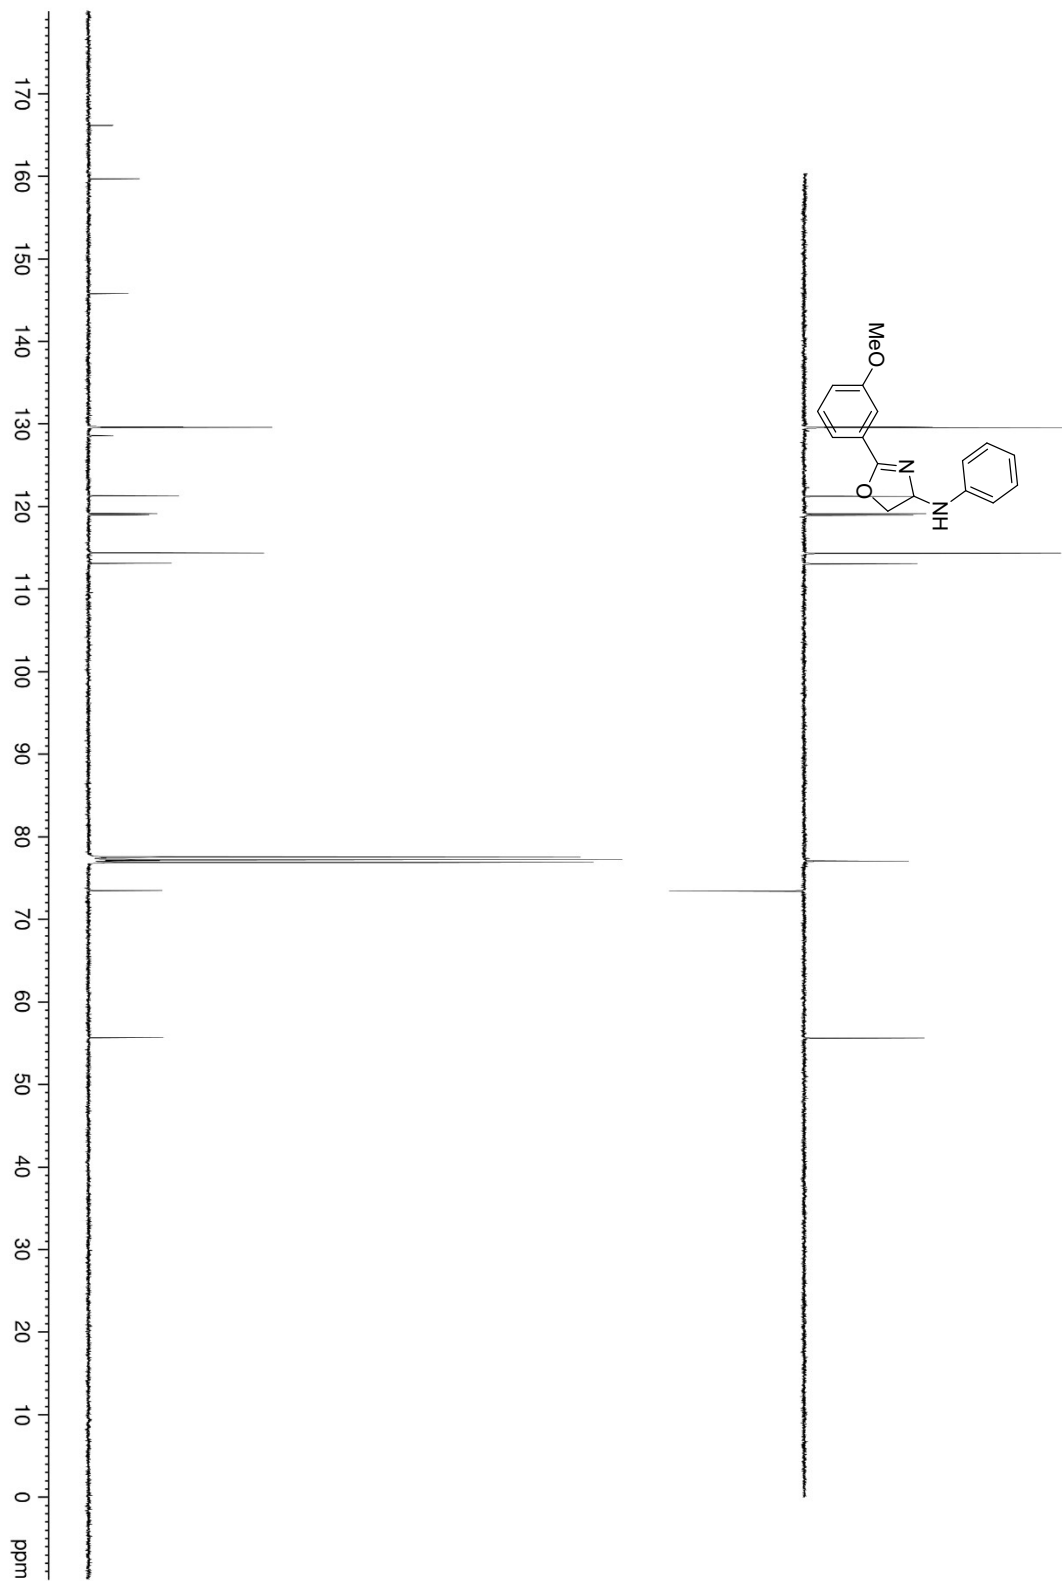

Hong et al.

Figure 18.  $^1\text{H}$  NMR

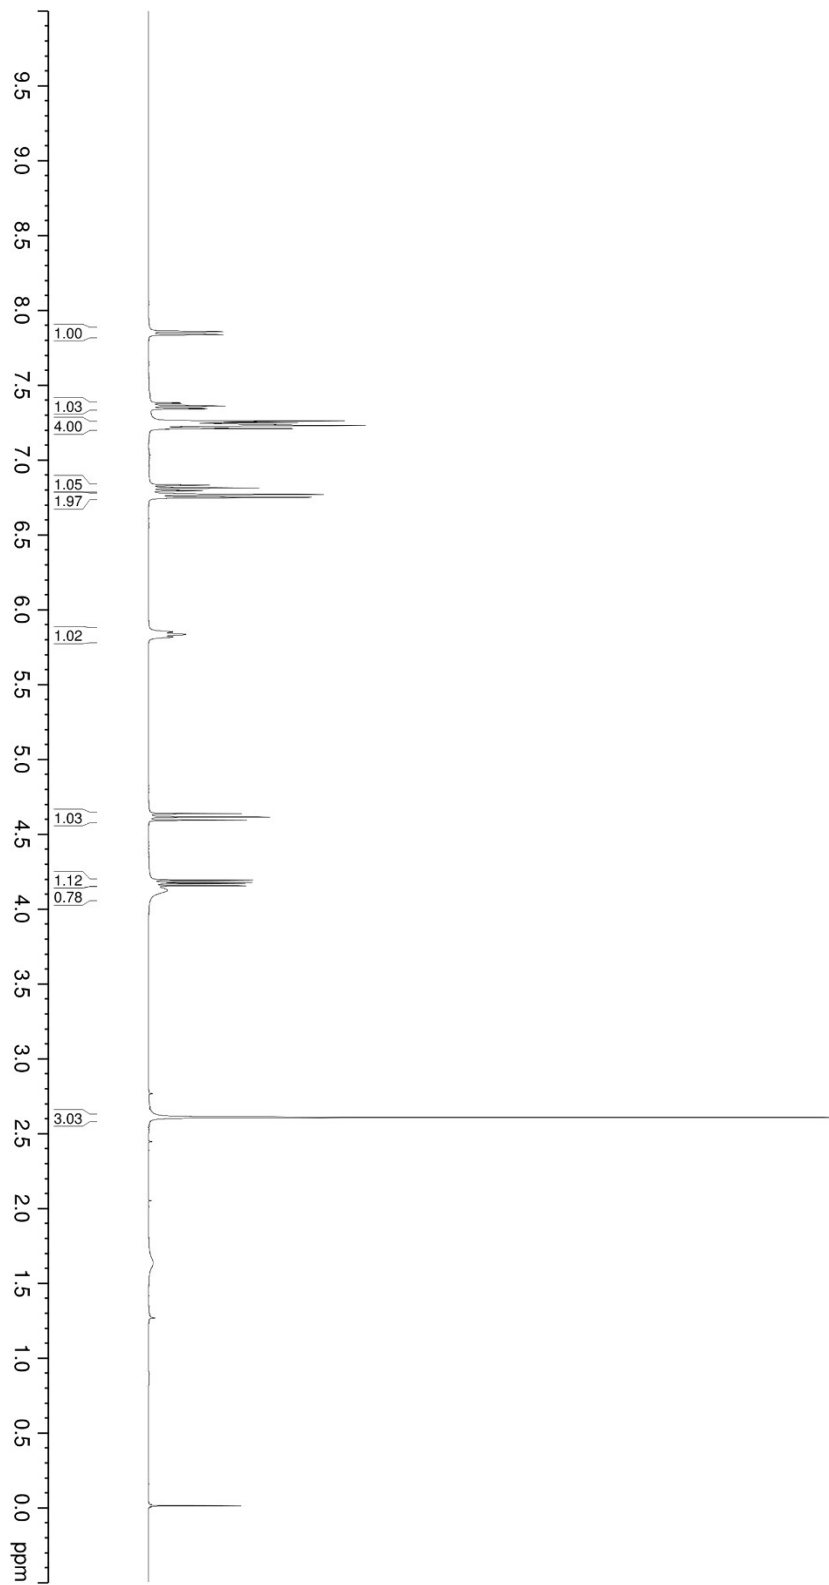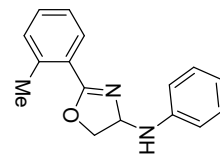

Hong et al.

Figure 19.  $^{13}\text{C}$  NMI

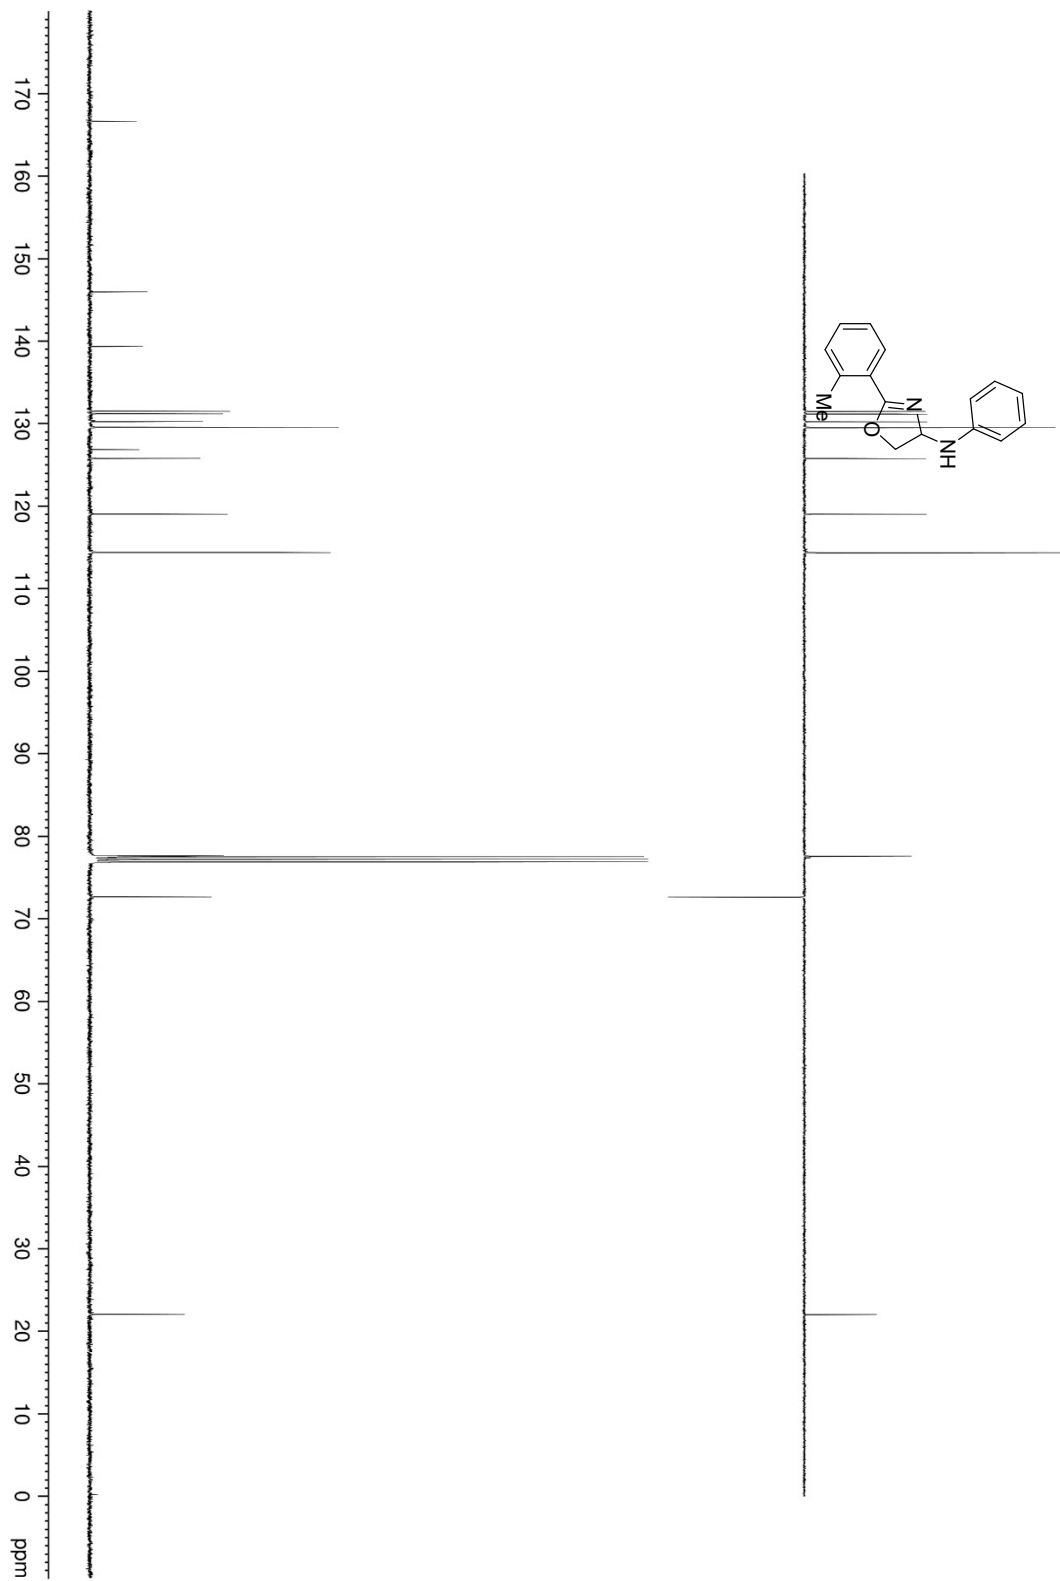

Hong et al.

Figure 20.  $^1\text{H}$  NMR

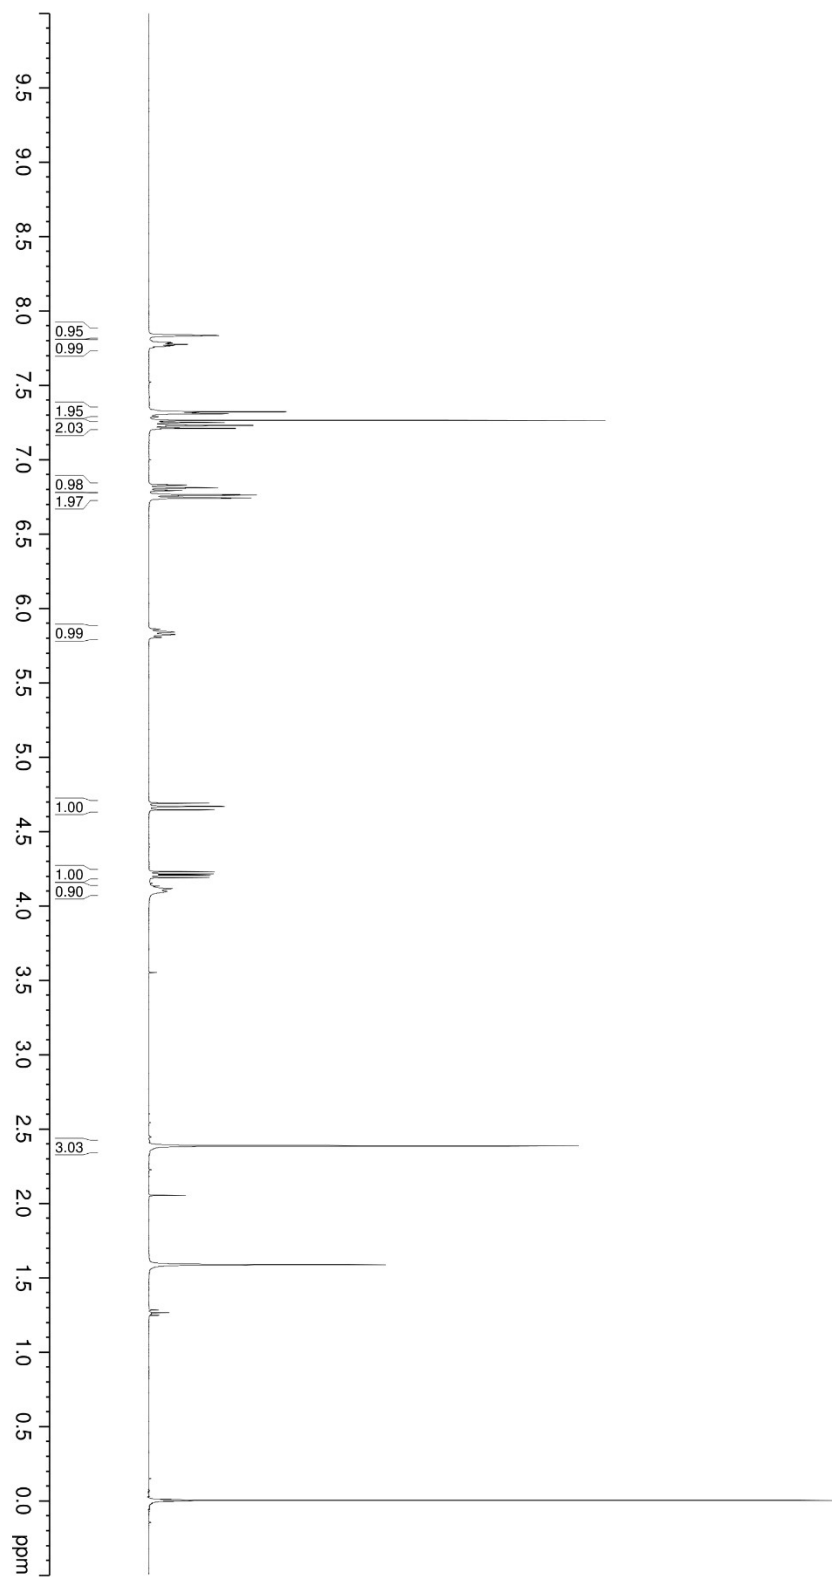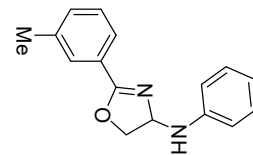

Figure 21.  $^{13}\text{C}$  NMR

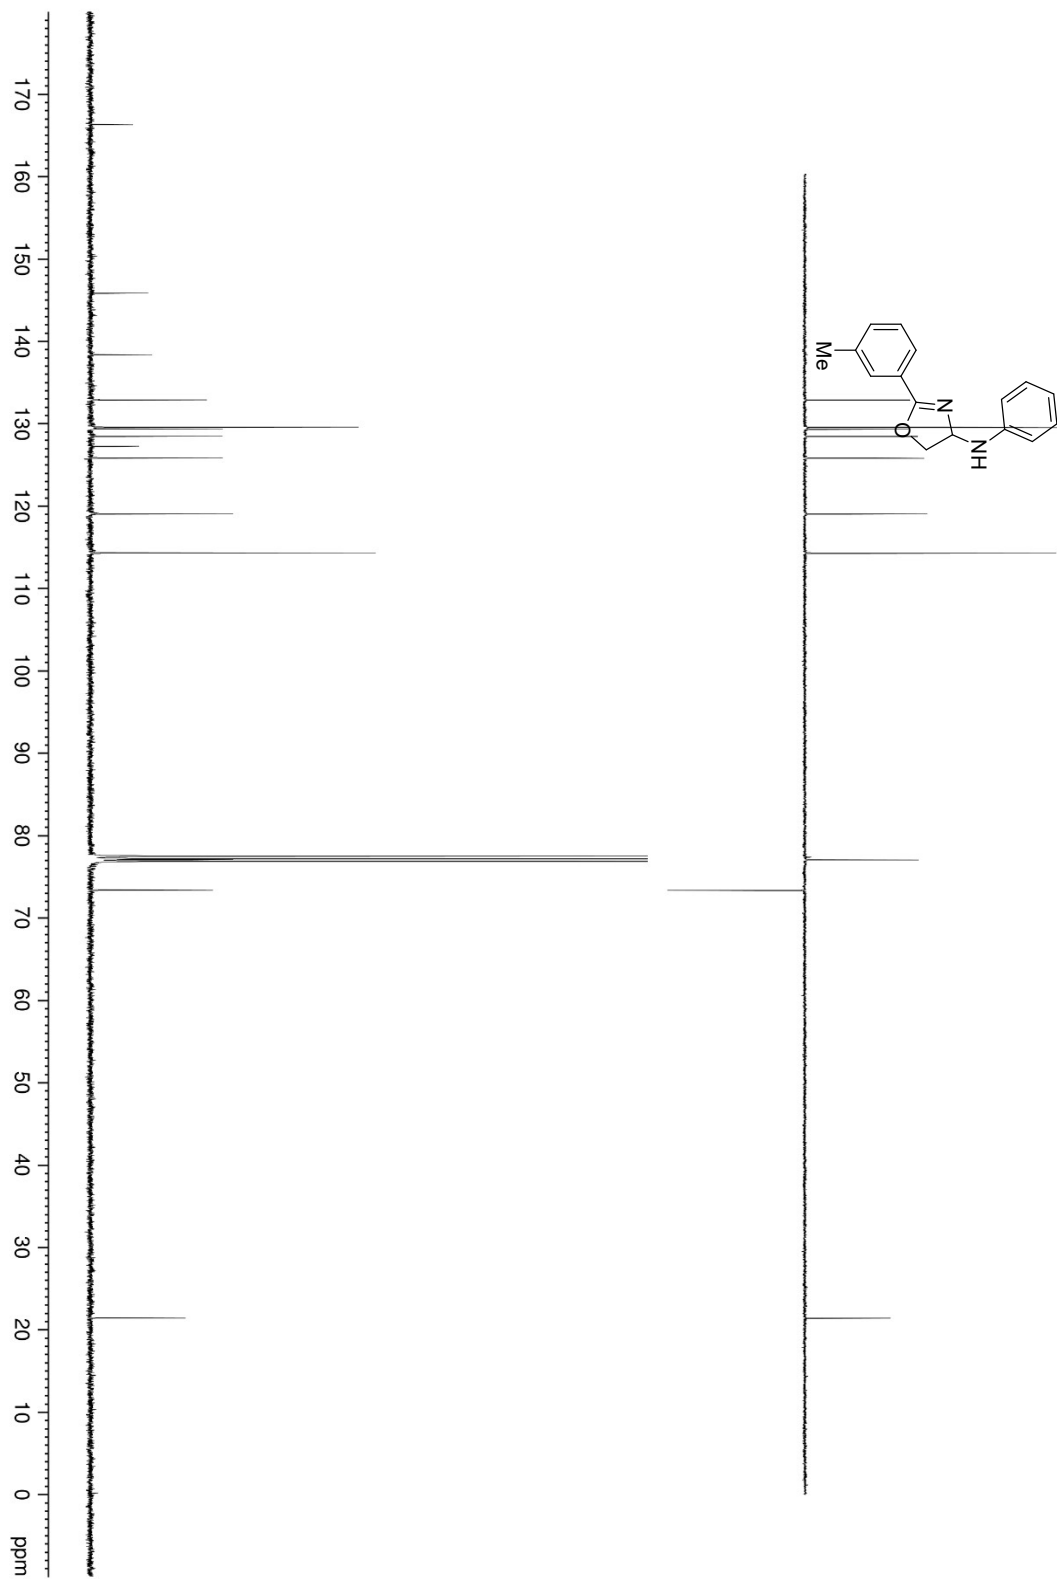

Hong et al.

Figure 22.  $^1\text{H}$  NMR

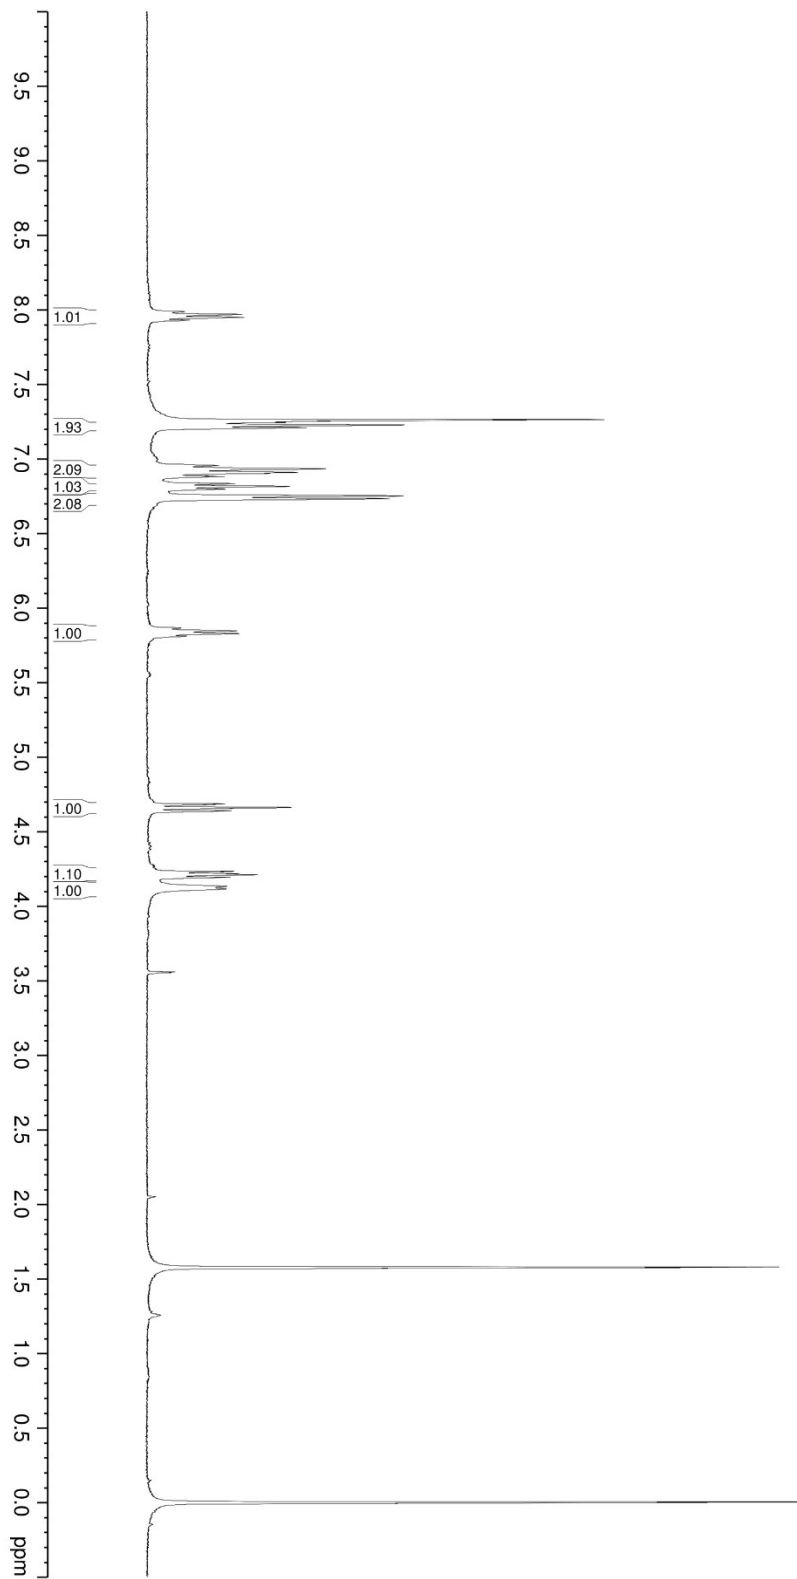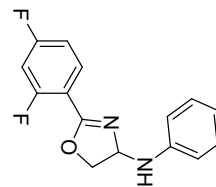

Hong et al.

Figure 23.  $^{13}\text{C}$  NMR

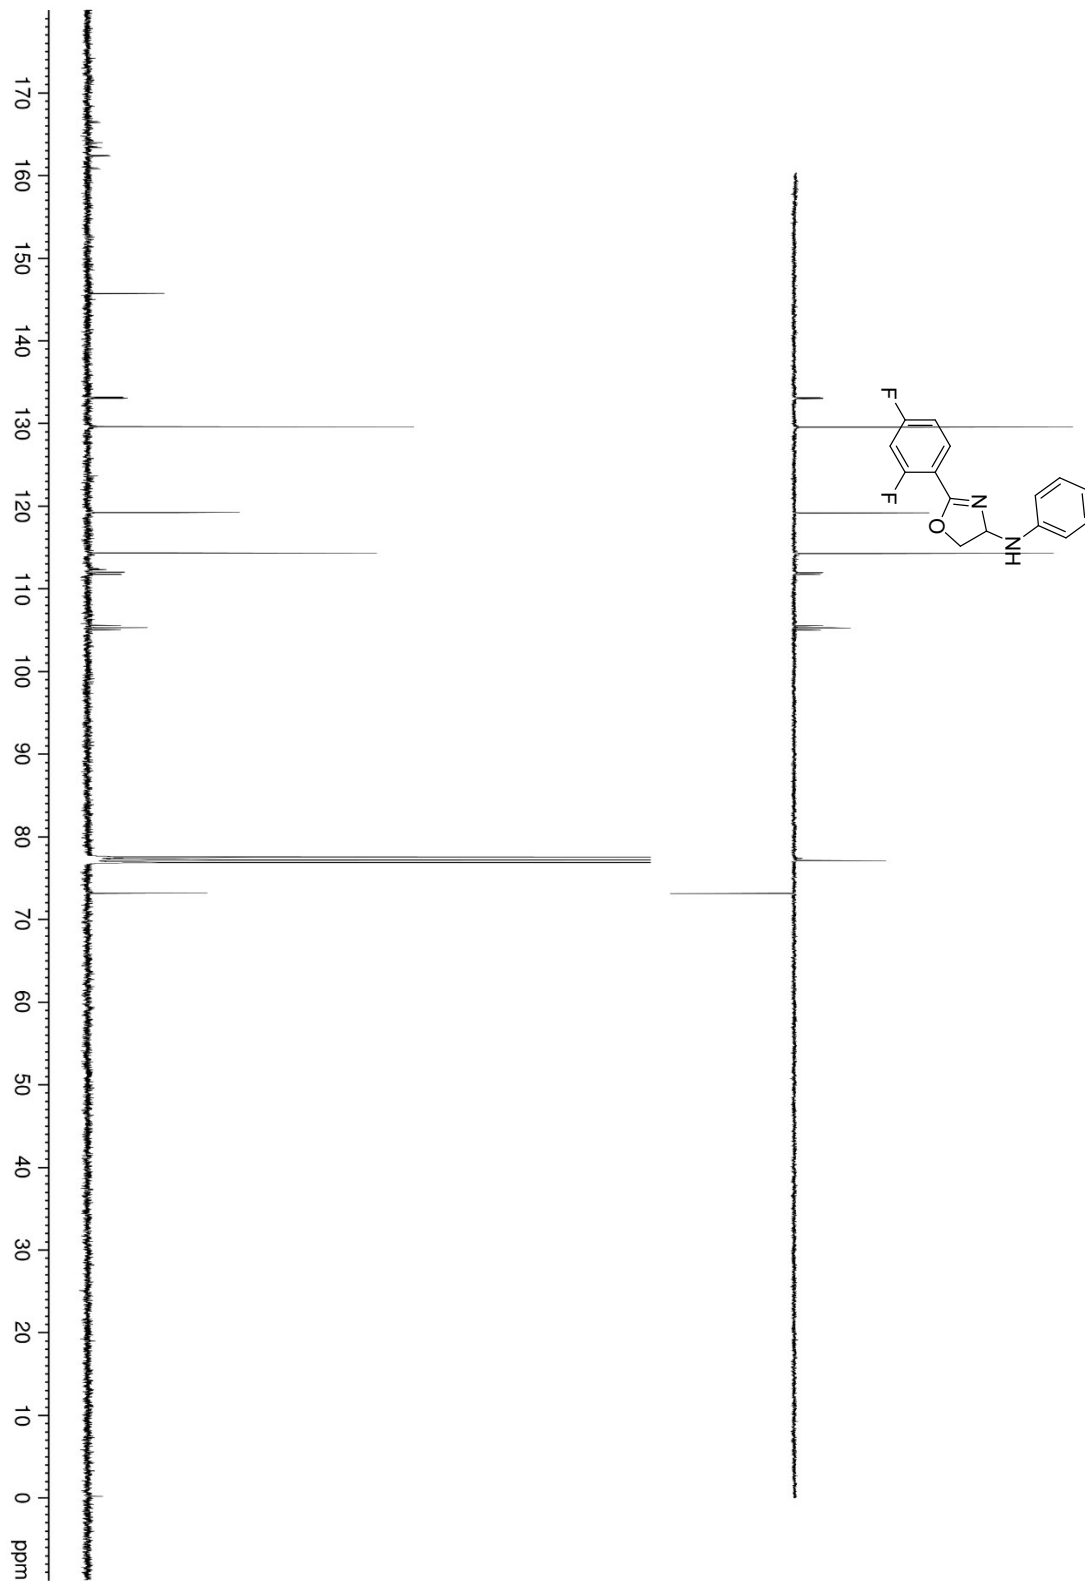

Hong et al.

Figure 24.  $^{19}\text{F}$  NMR

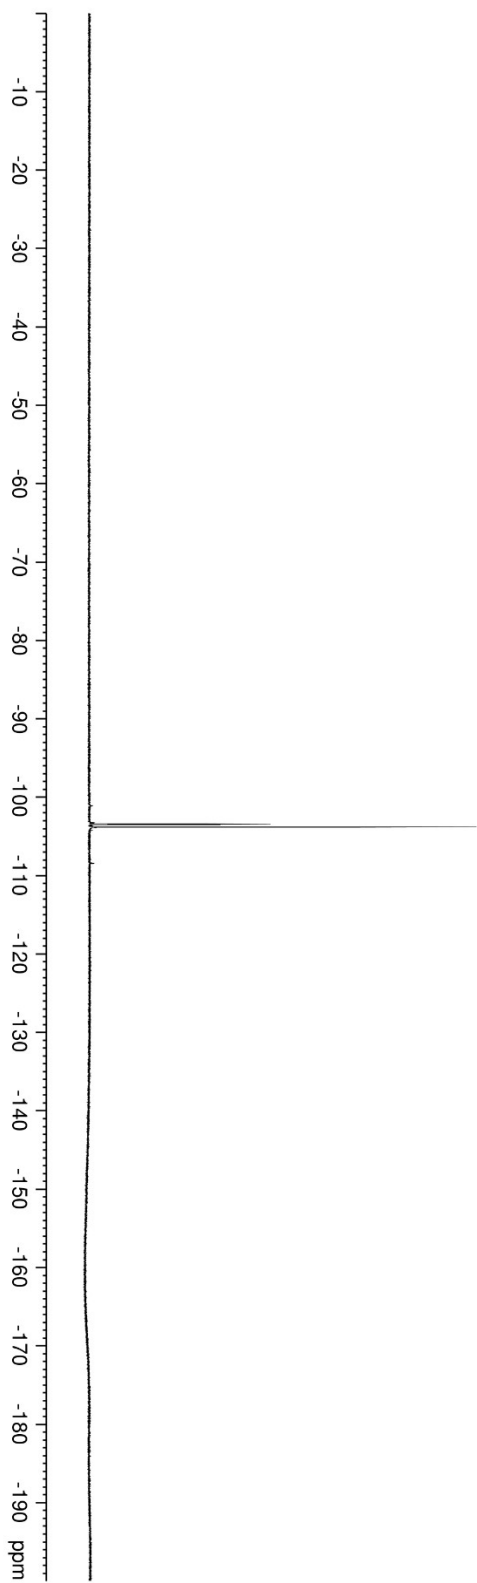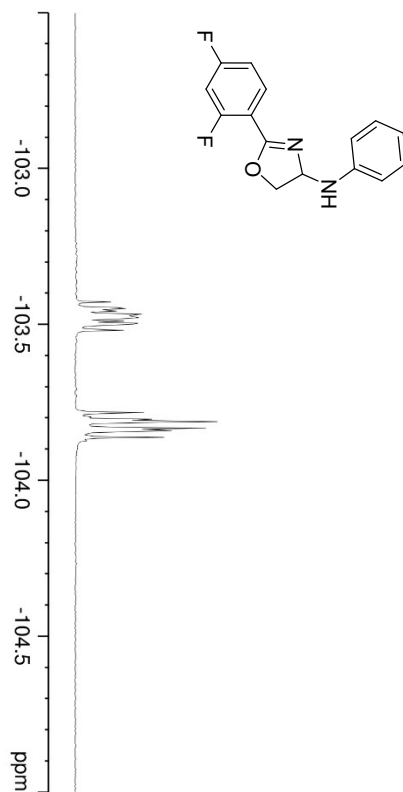

Hong et al.

Figure 25.  $^1\text{H}$  NMR

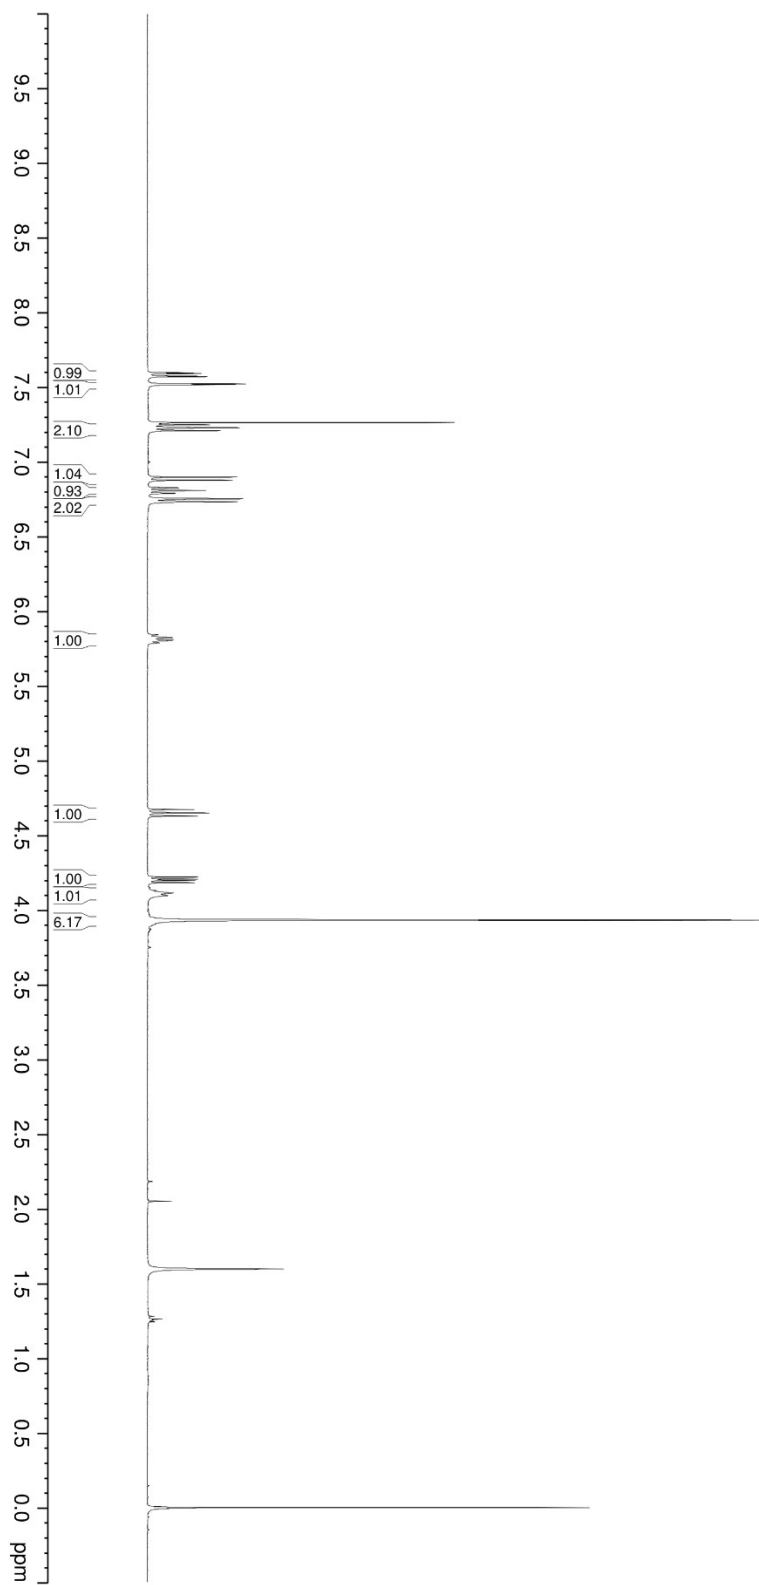

Hong et al.

Figure 26.  $^{13}\text{C}$  NMI

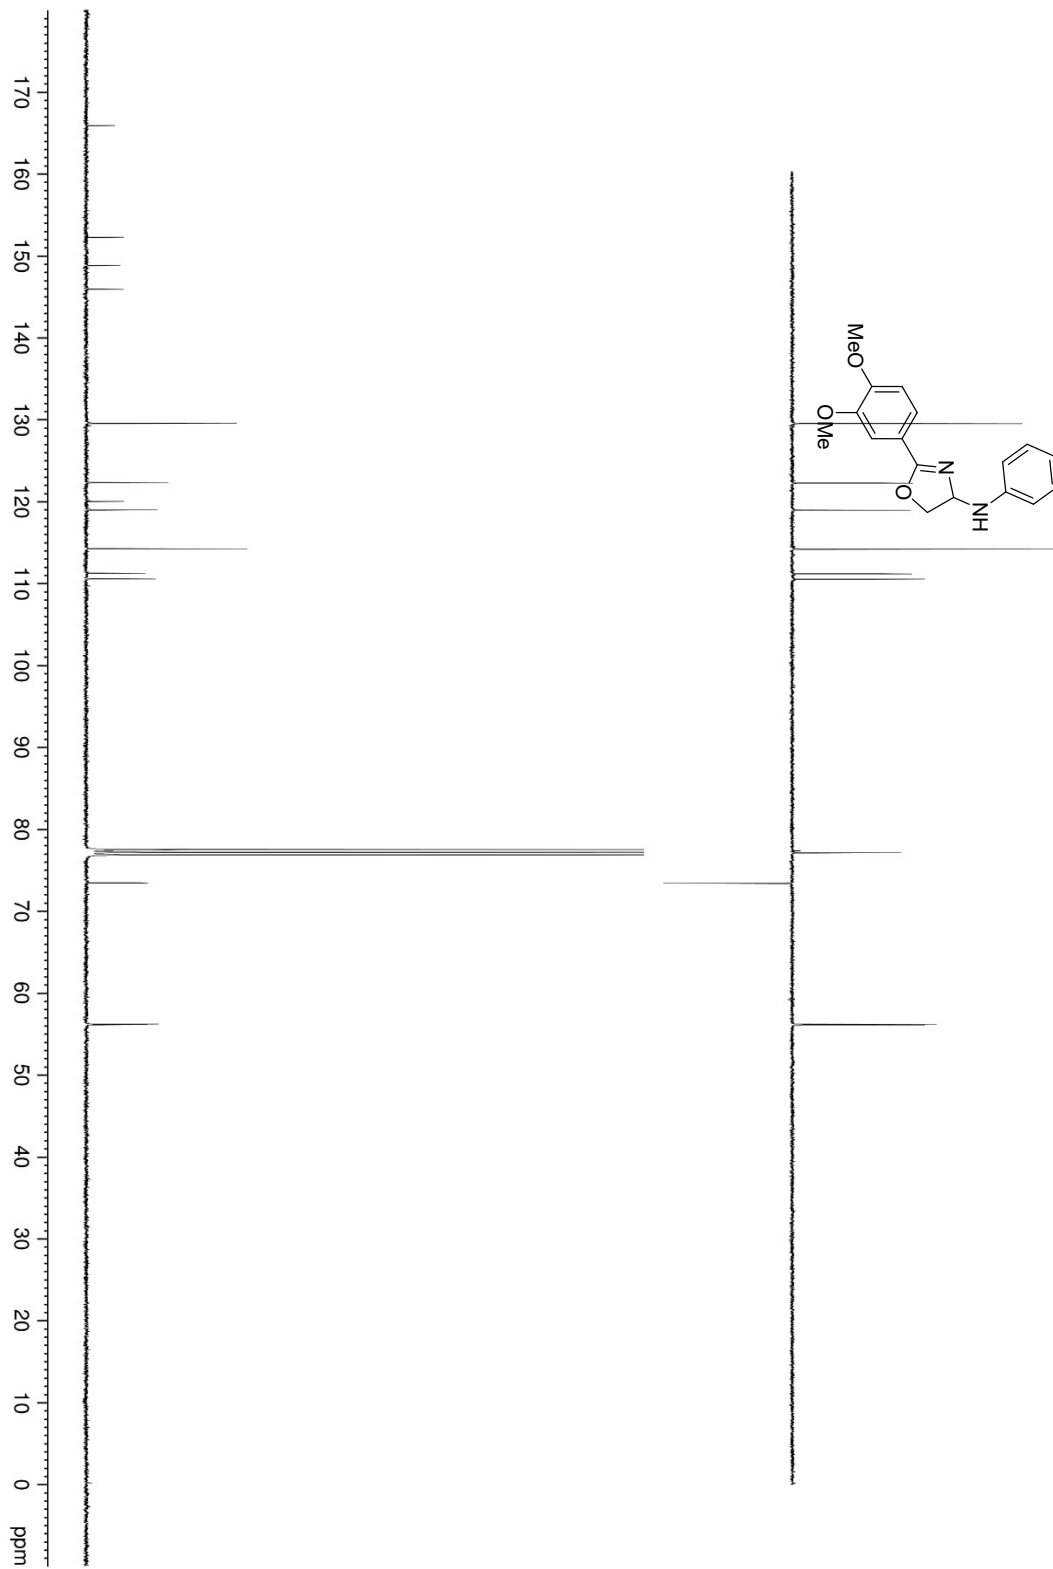

Hong et al.

Figure 27.  $^1\text{H}$  NMR

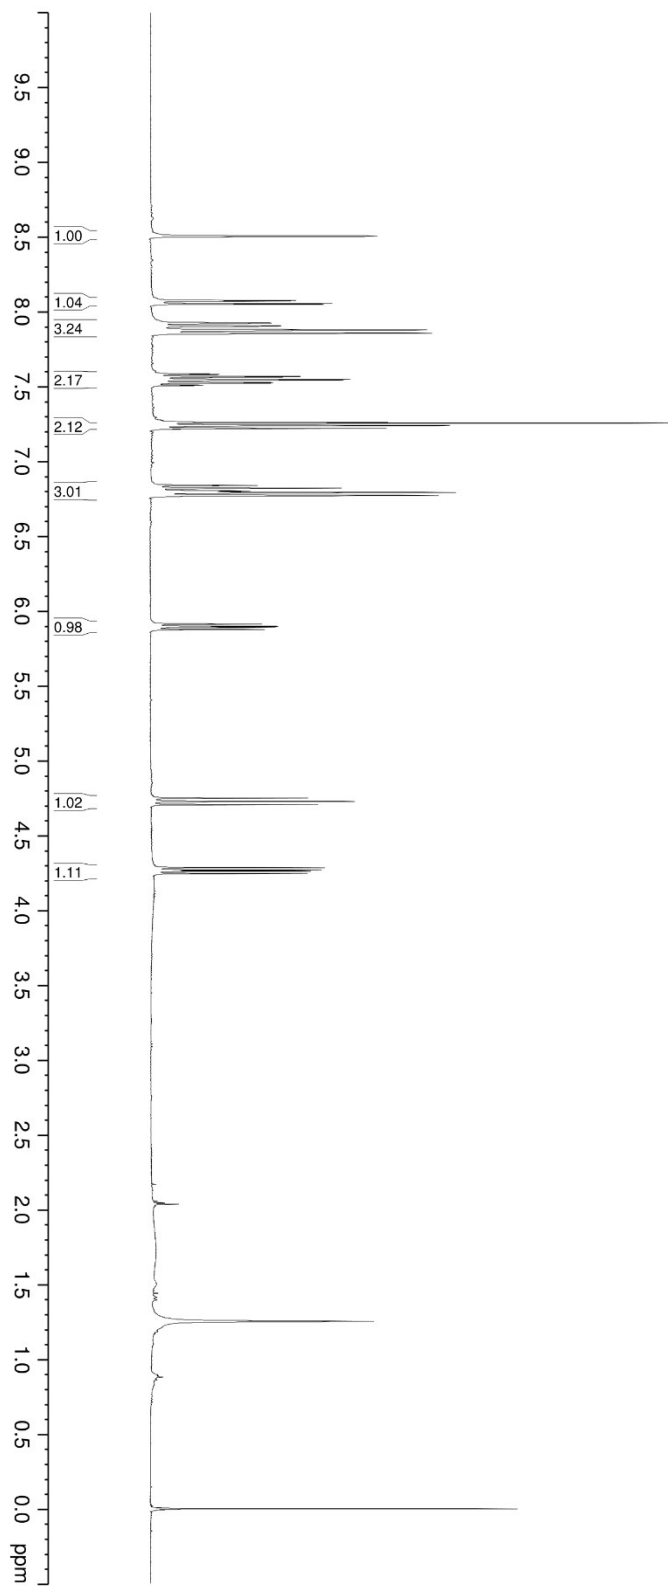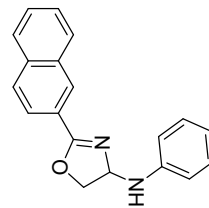

Figure 28.  $^{13}\text{C}$  NMI

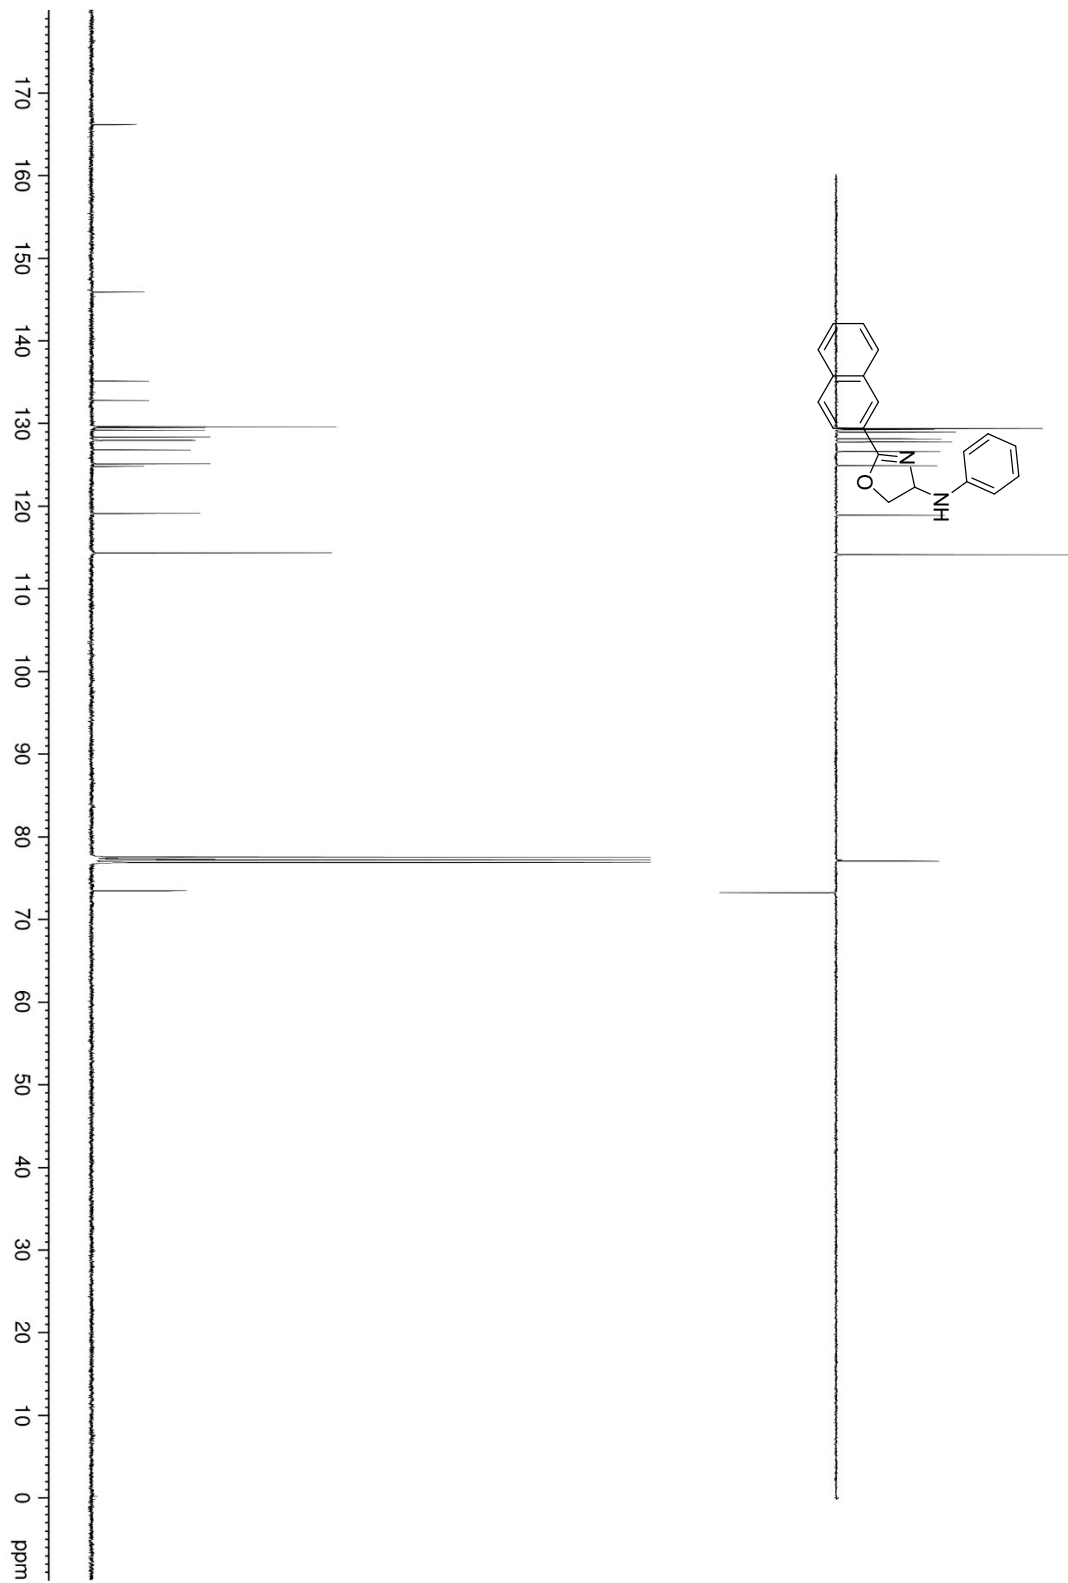

Hong et al.

Figure 29.  $^1\text{H}$  NMR

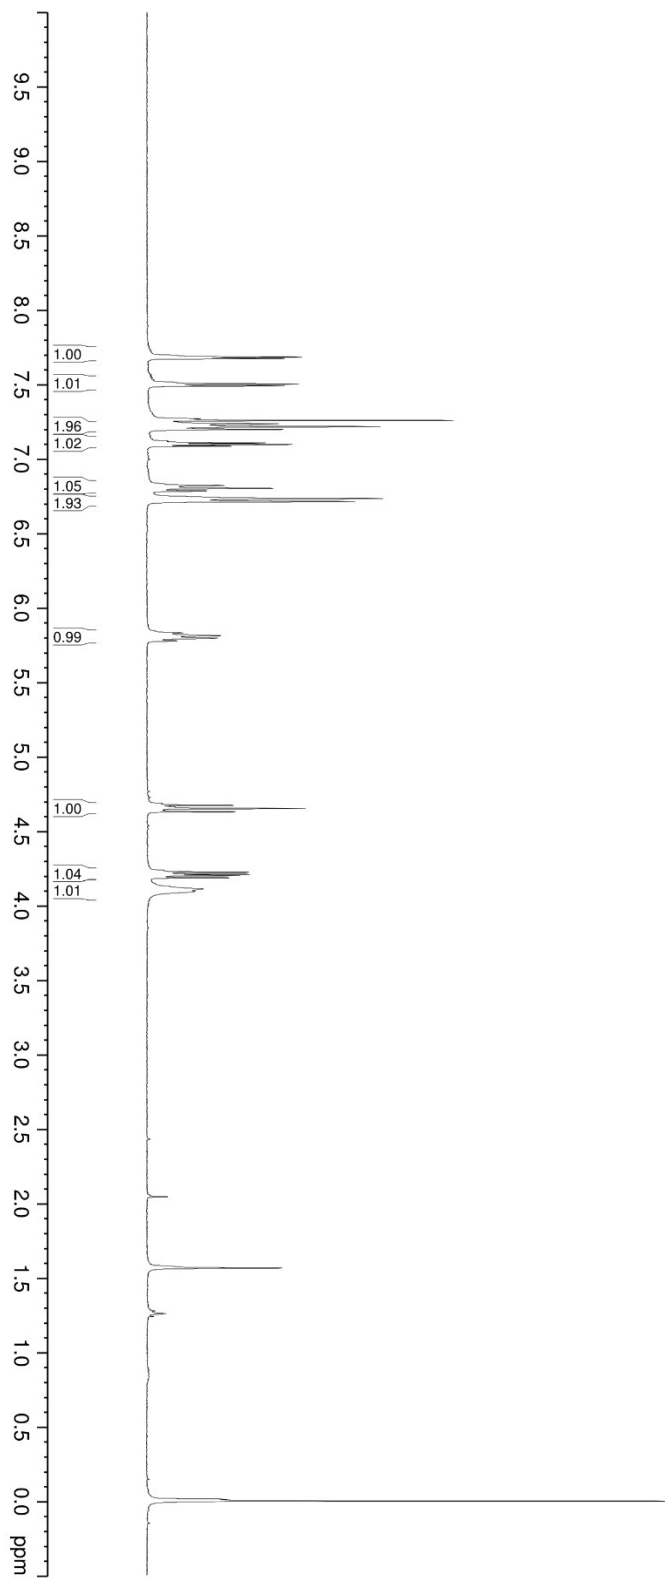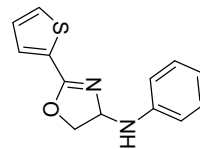

Hong et al.

Figure 30.  $^{13}\text{C}$  NMI

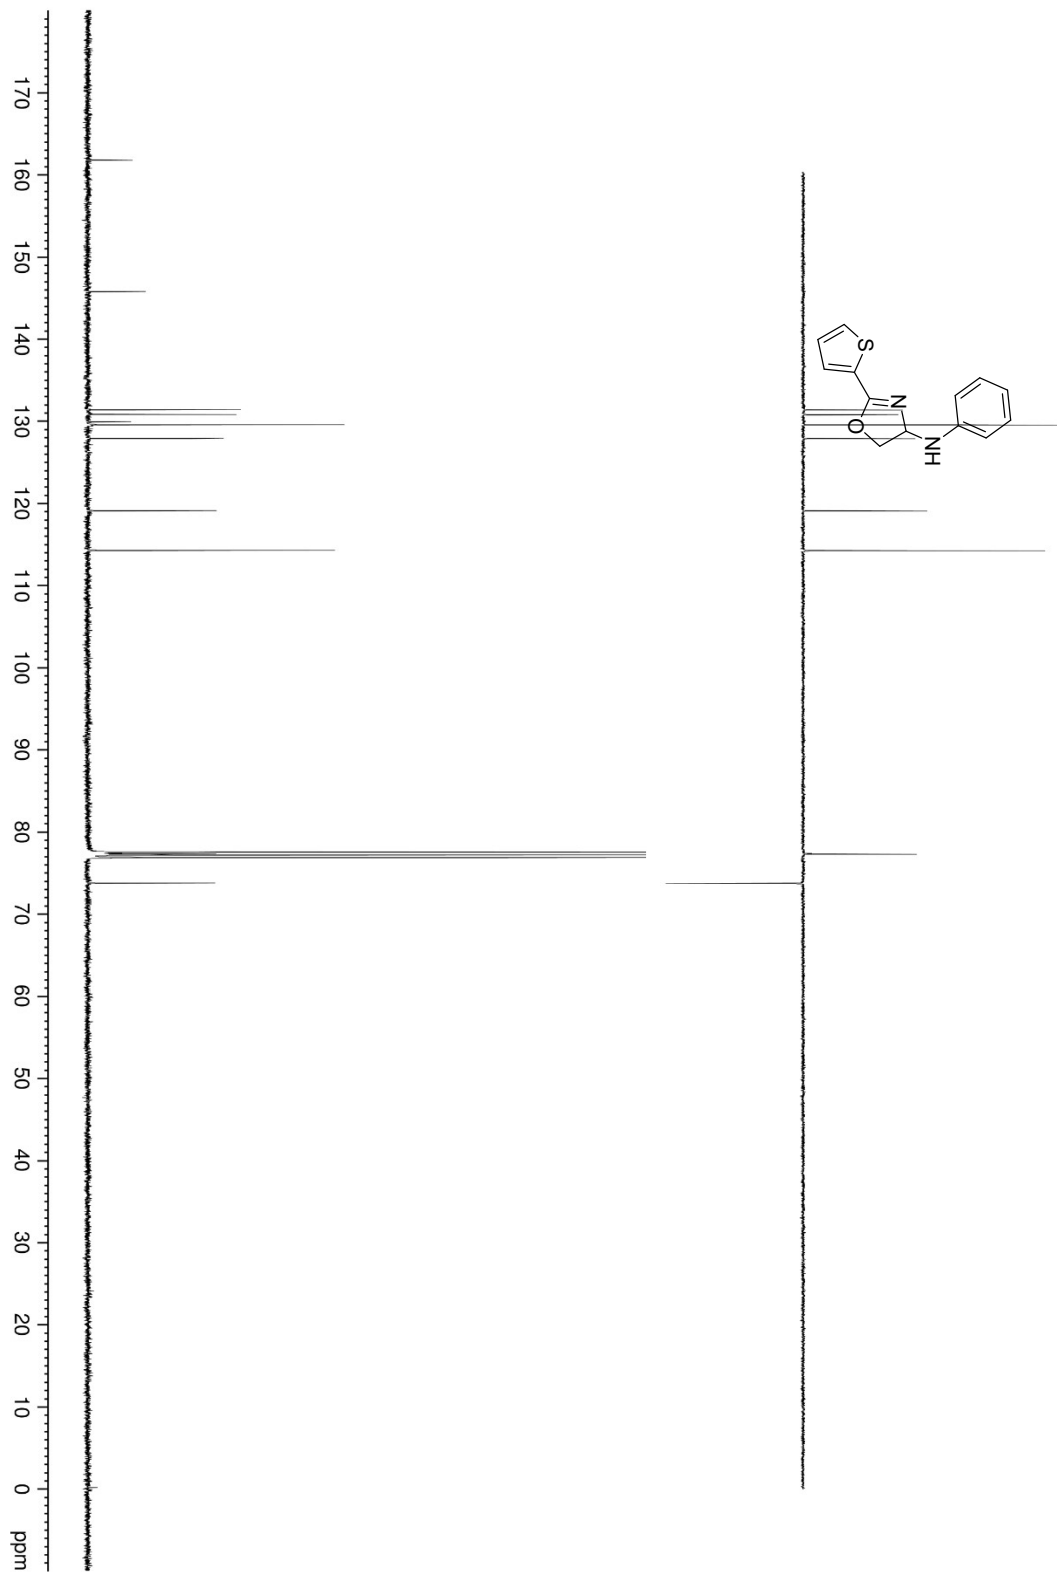

Hong et al.

Figure 31.  $^1\text{H}$  NMR

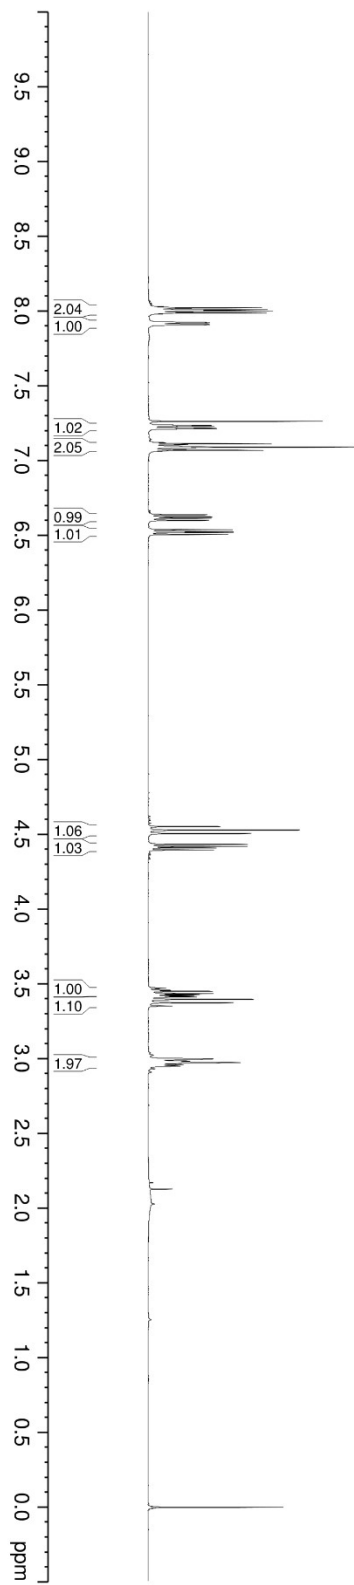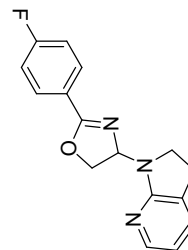

Hong et al.

Figure 32.  $^{13}\text{C}$  NMI

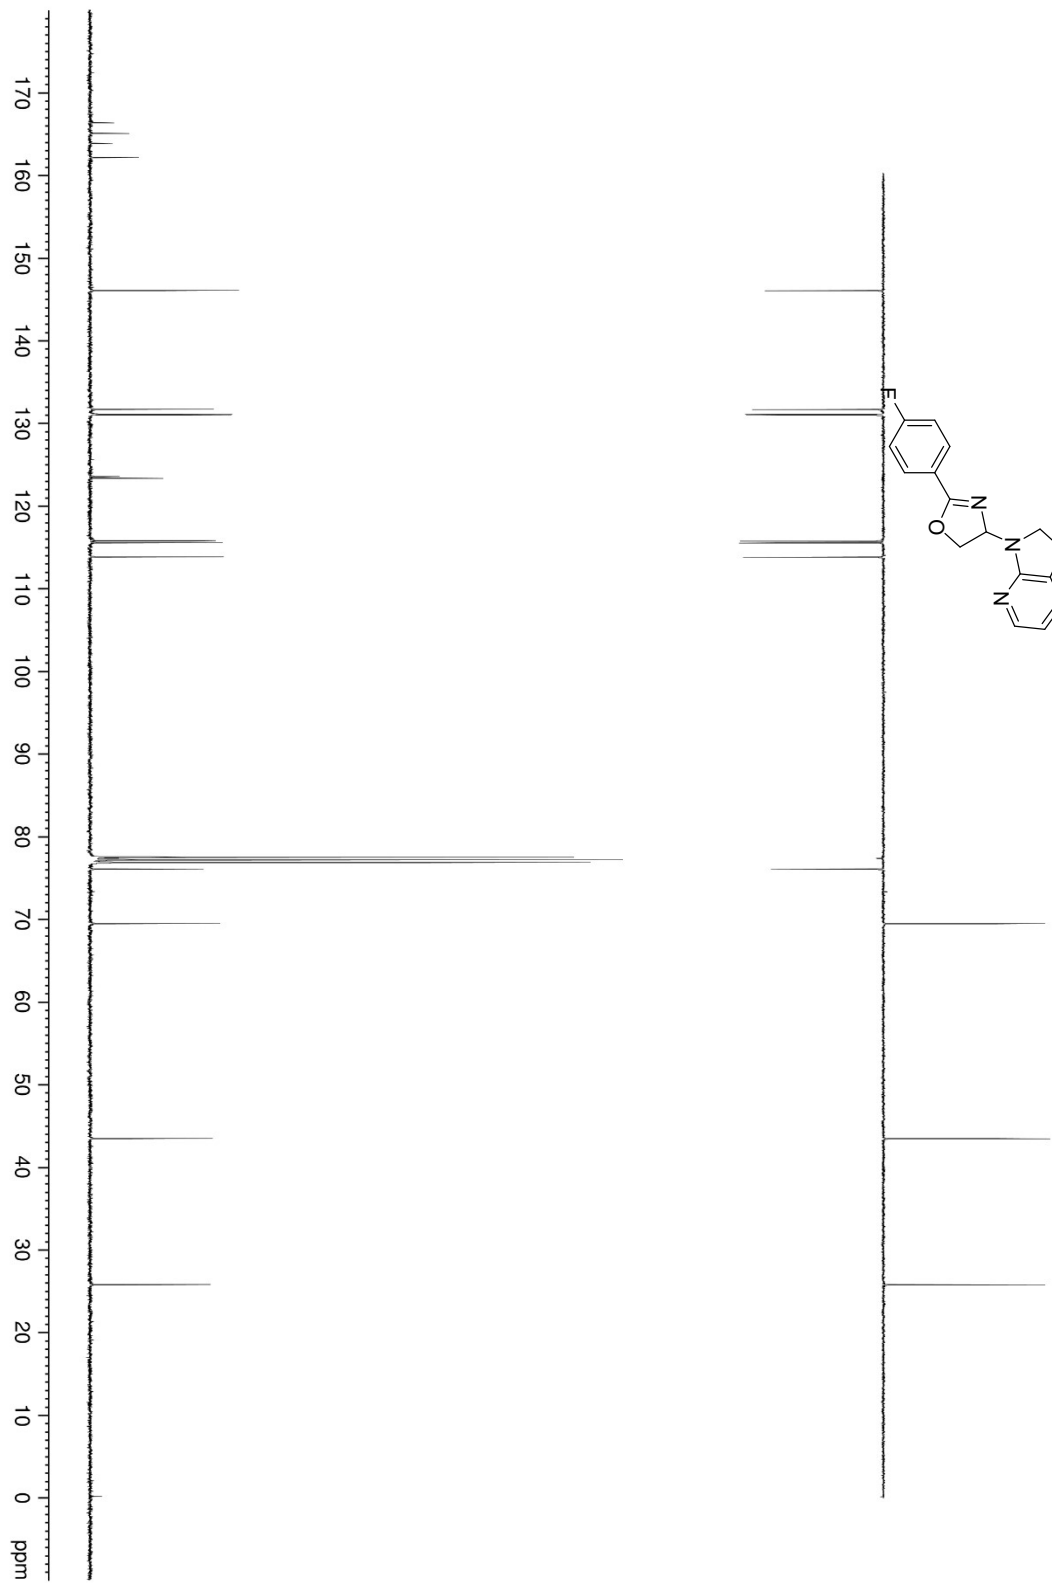

Hong et al.

Figure 33.  $^{19}\text{F}$  NMR

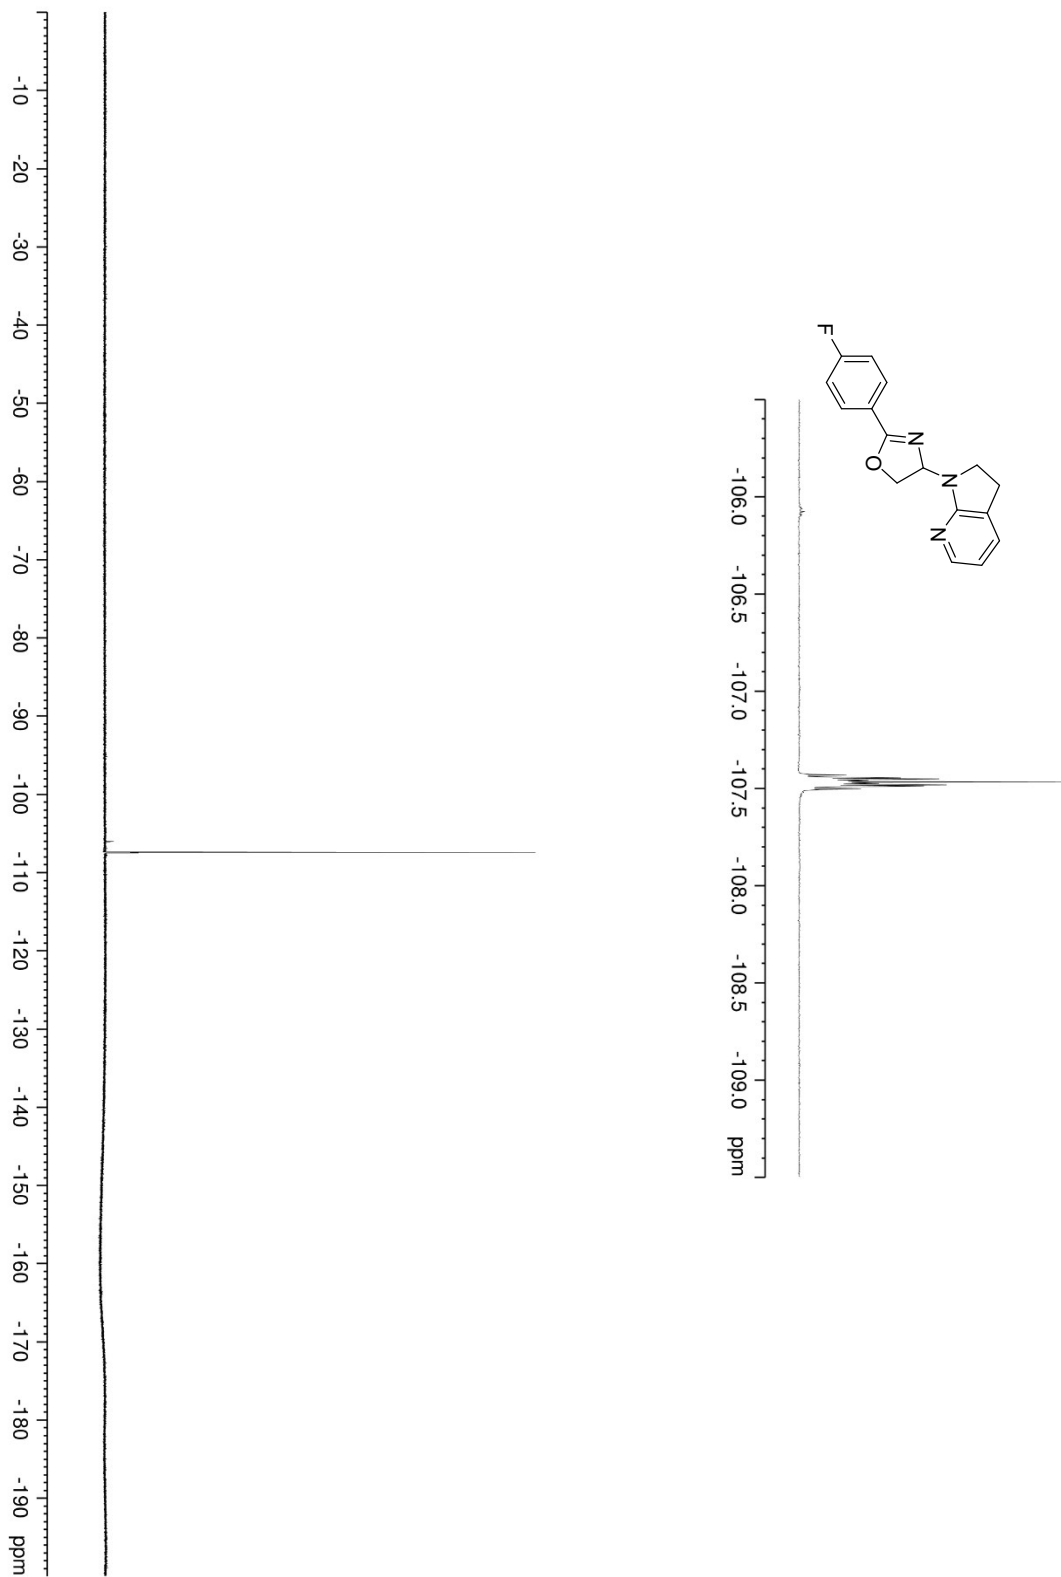

Hong et al.

Figure 34.  $^1\text{H}$  NMR

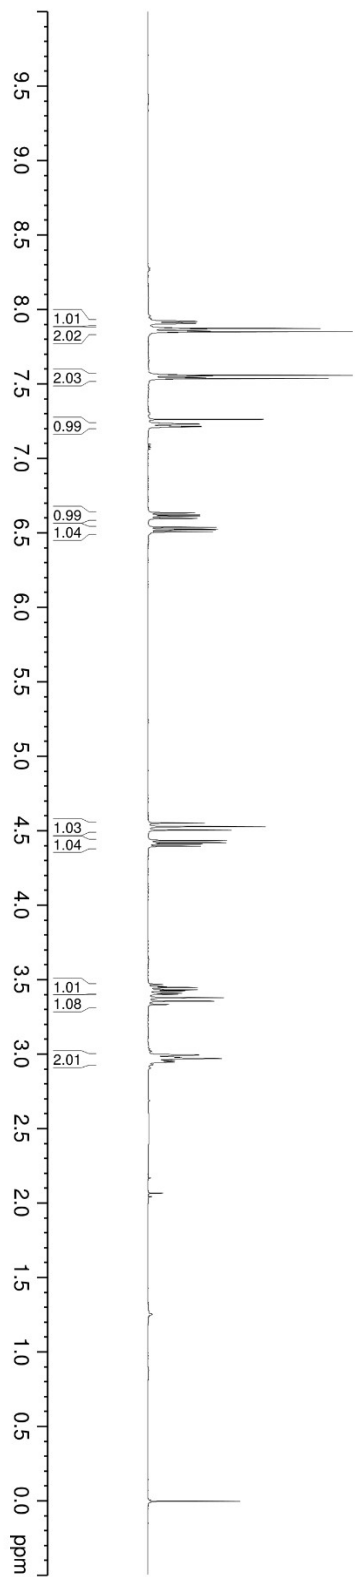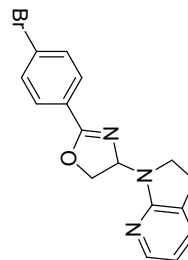

Hong et al.

Figure 35.  $^{13}\text{C}$  NMI

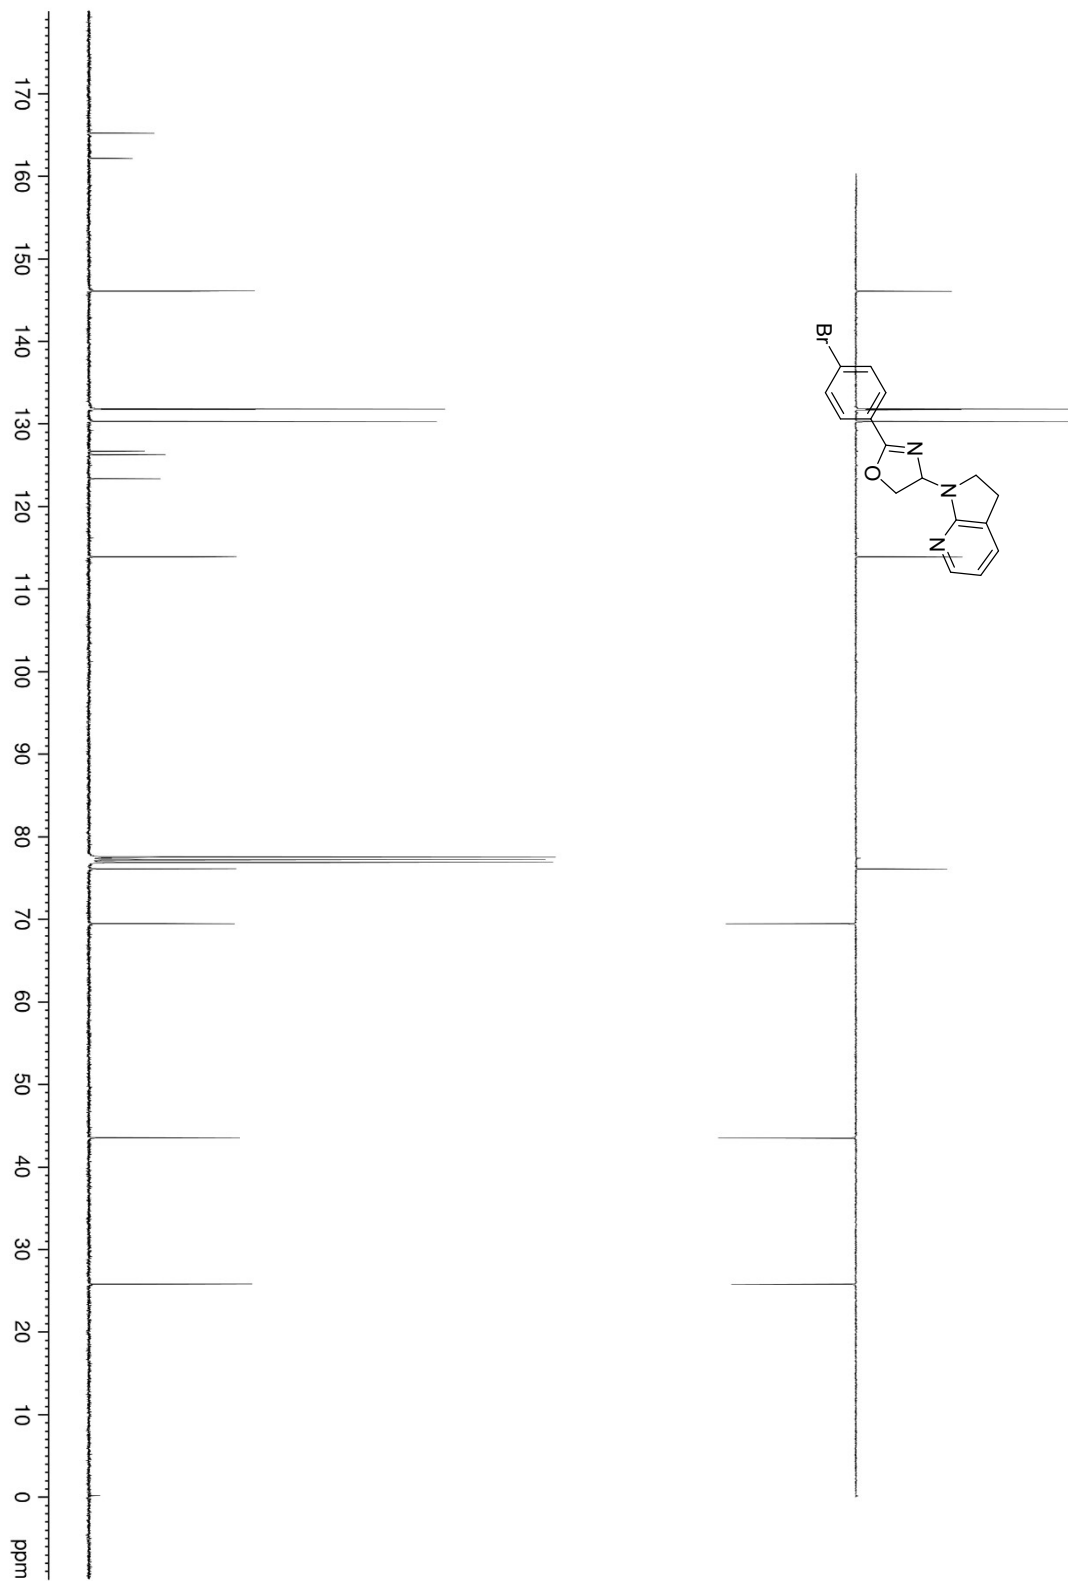

Hong et al.

Figure 36.  $^1\text{H}$  NMR

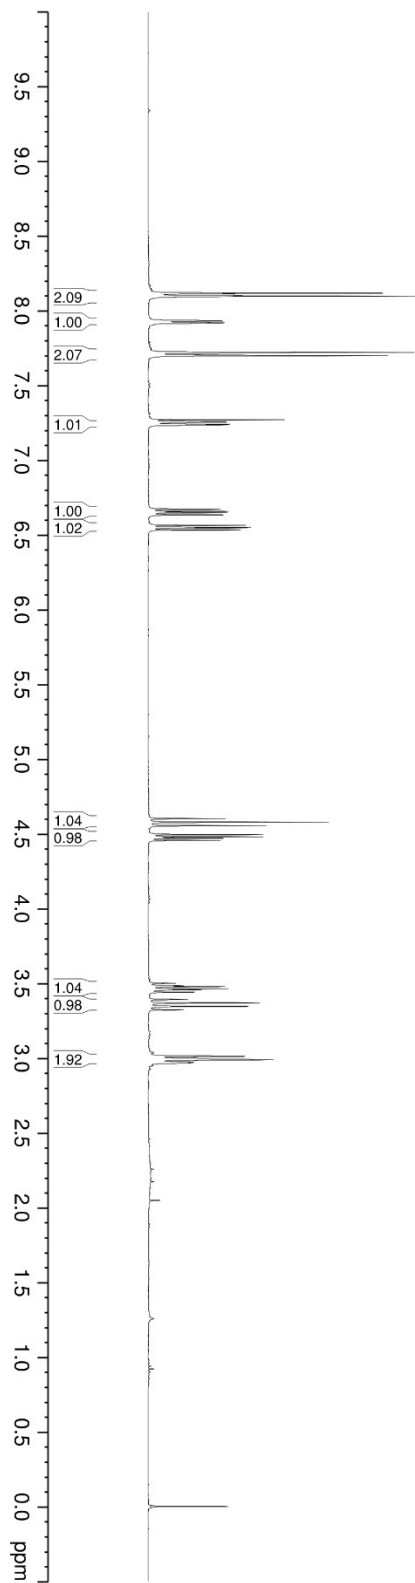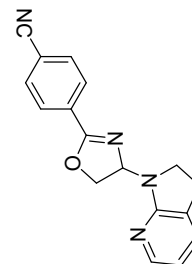

Hong et al.

Figure 37.  $^{13}\text{C}$  NMI

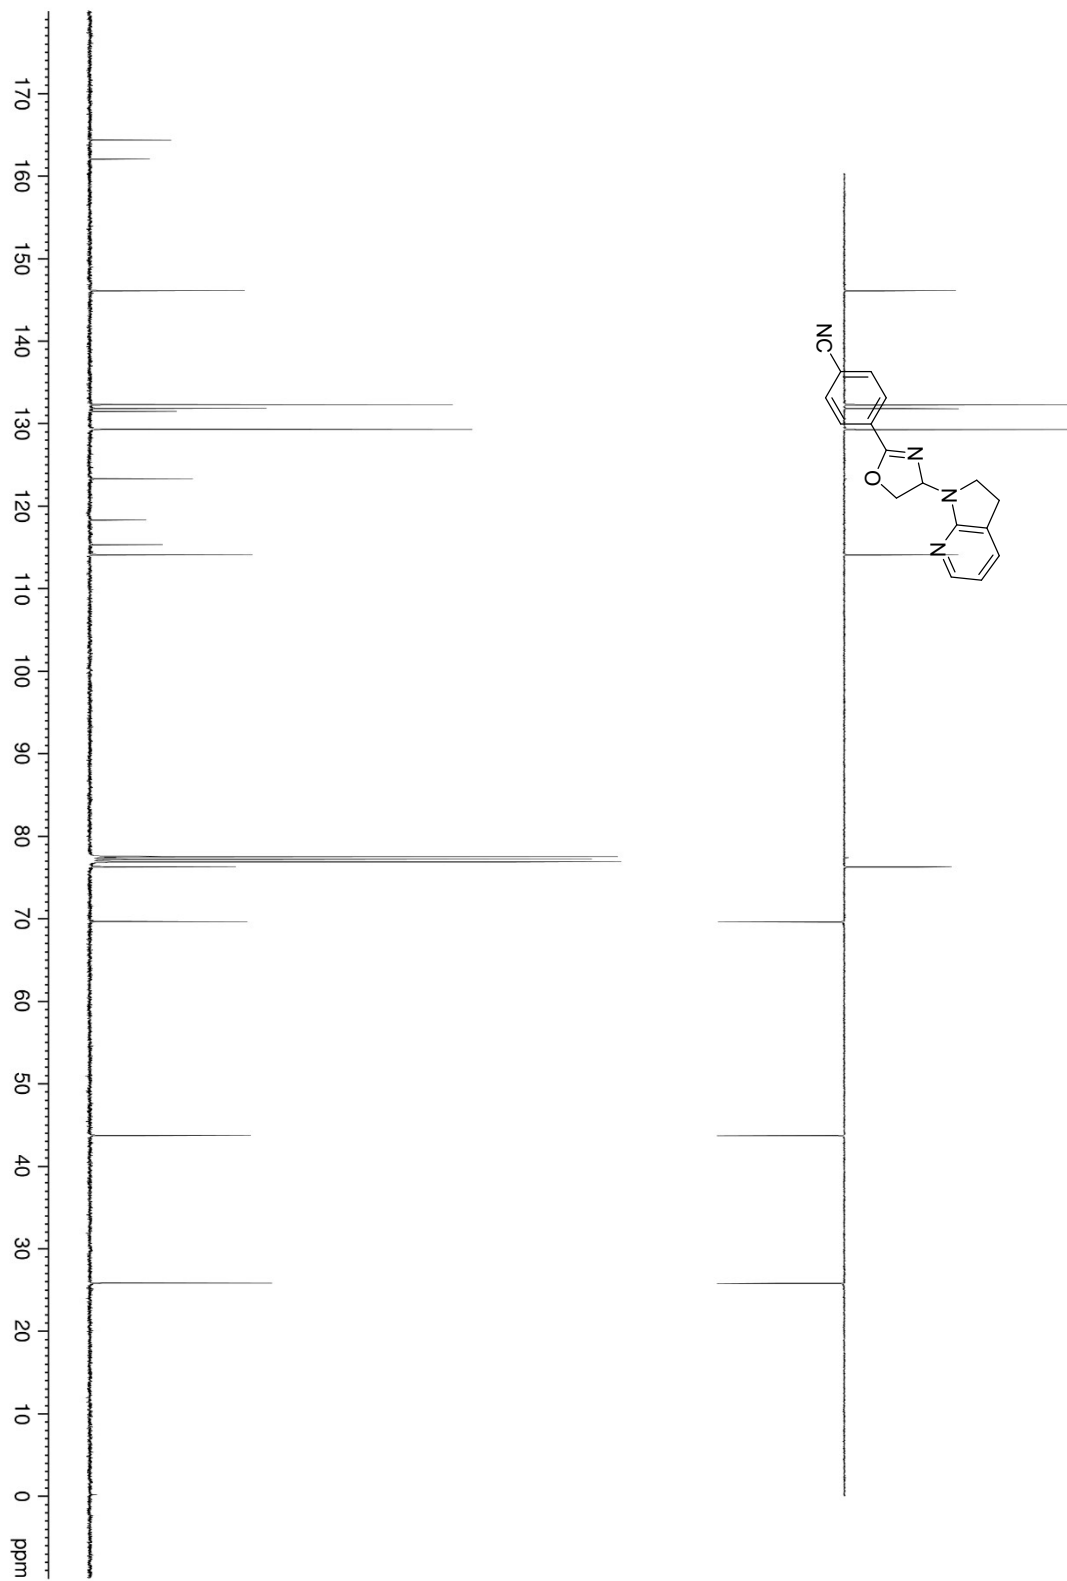

Hong et al.

Figure 38.  $^1\text{H}$  NMR

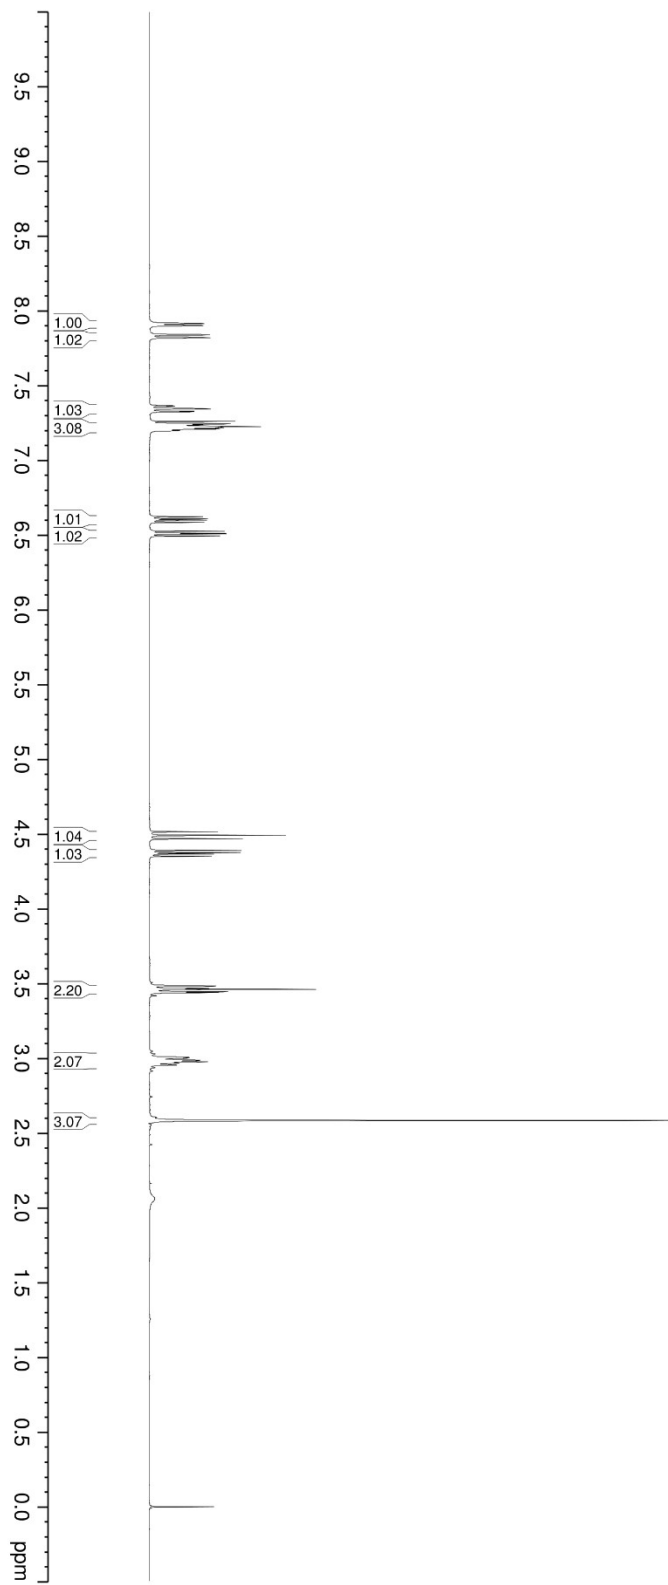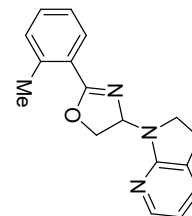

Hong et al.

Figure 39.  $^{13}\text{C}$  NMI

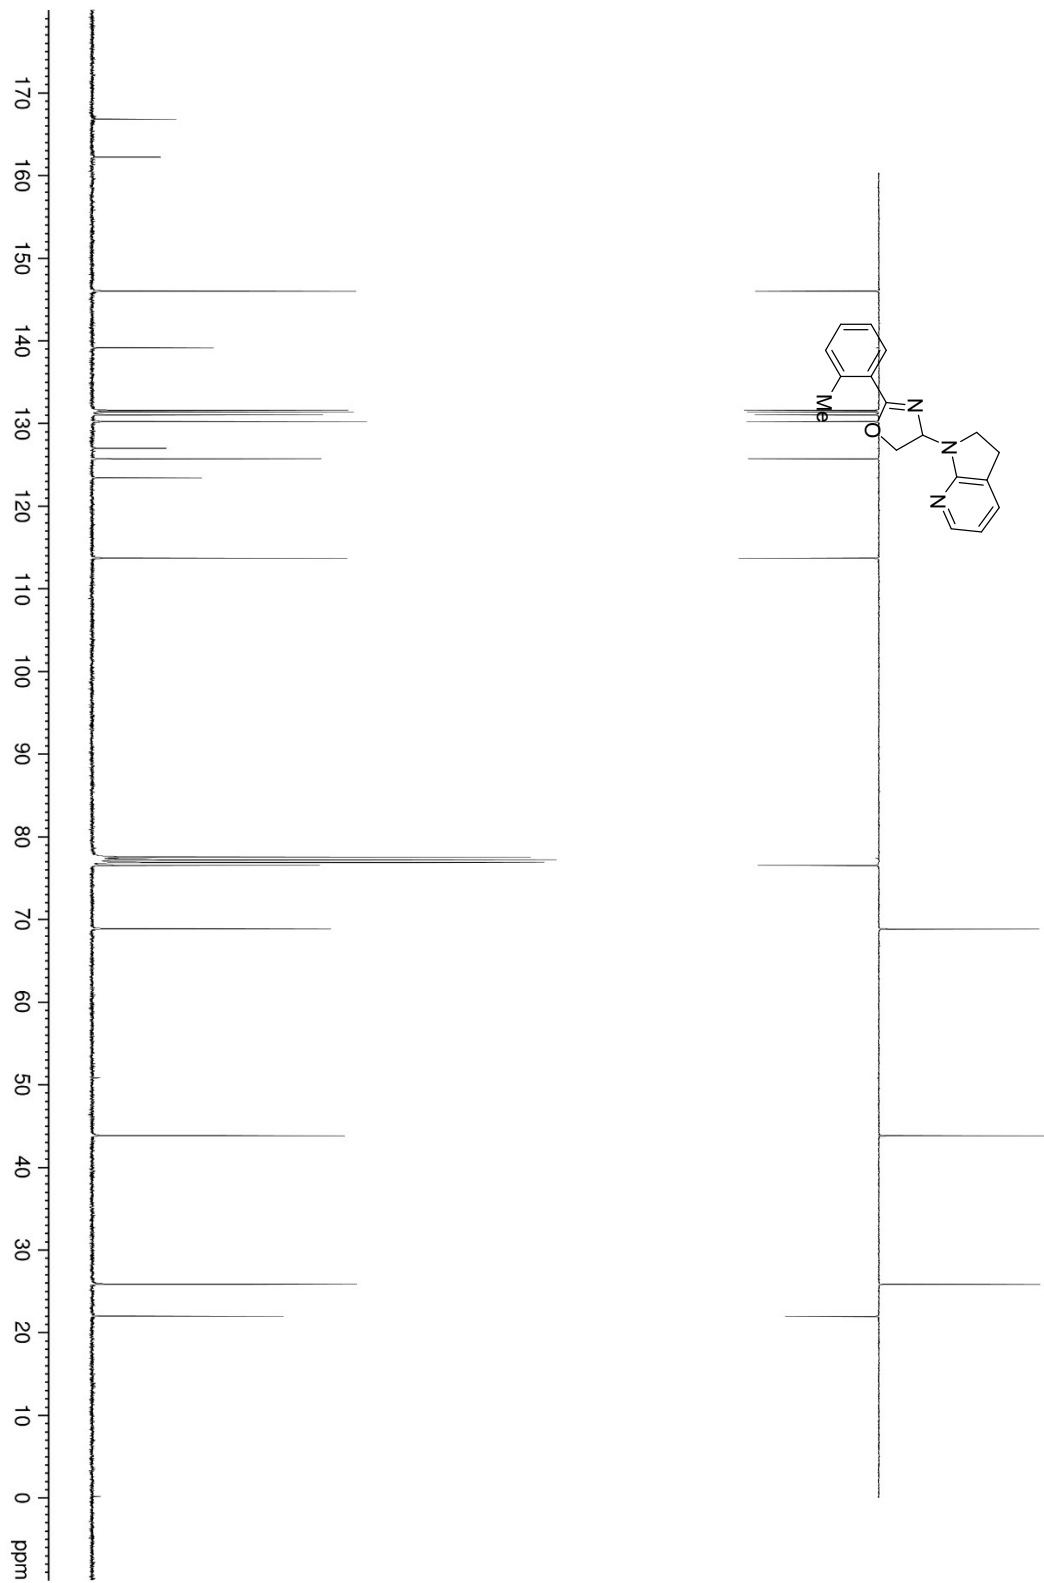

**Figure 40.**  $^1\text{H}$  NMR ( $\text{CDCl}_3$ ) of **71**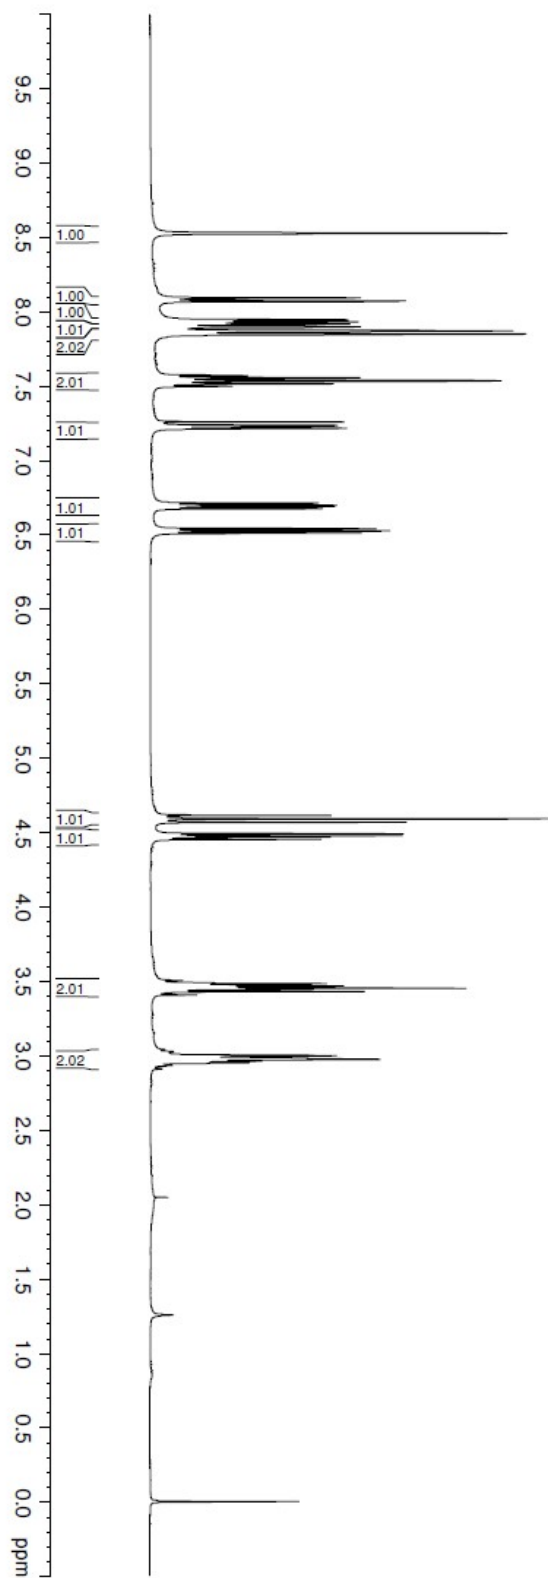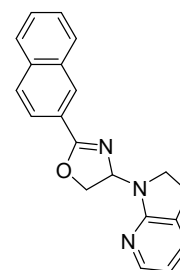

**Figure 41.**  $^{13}\text{C}$  NMR ( $\text{CDCl}_3$ ) of **71**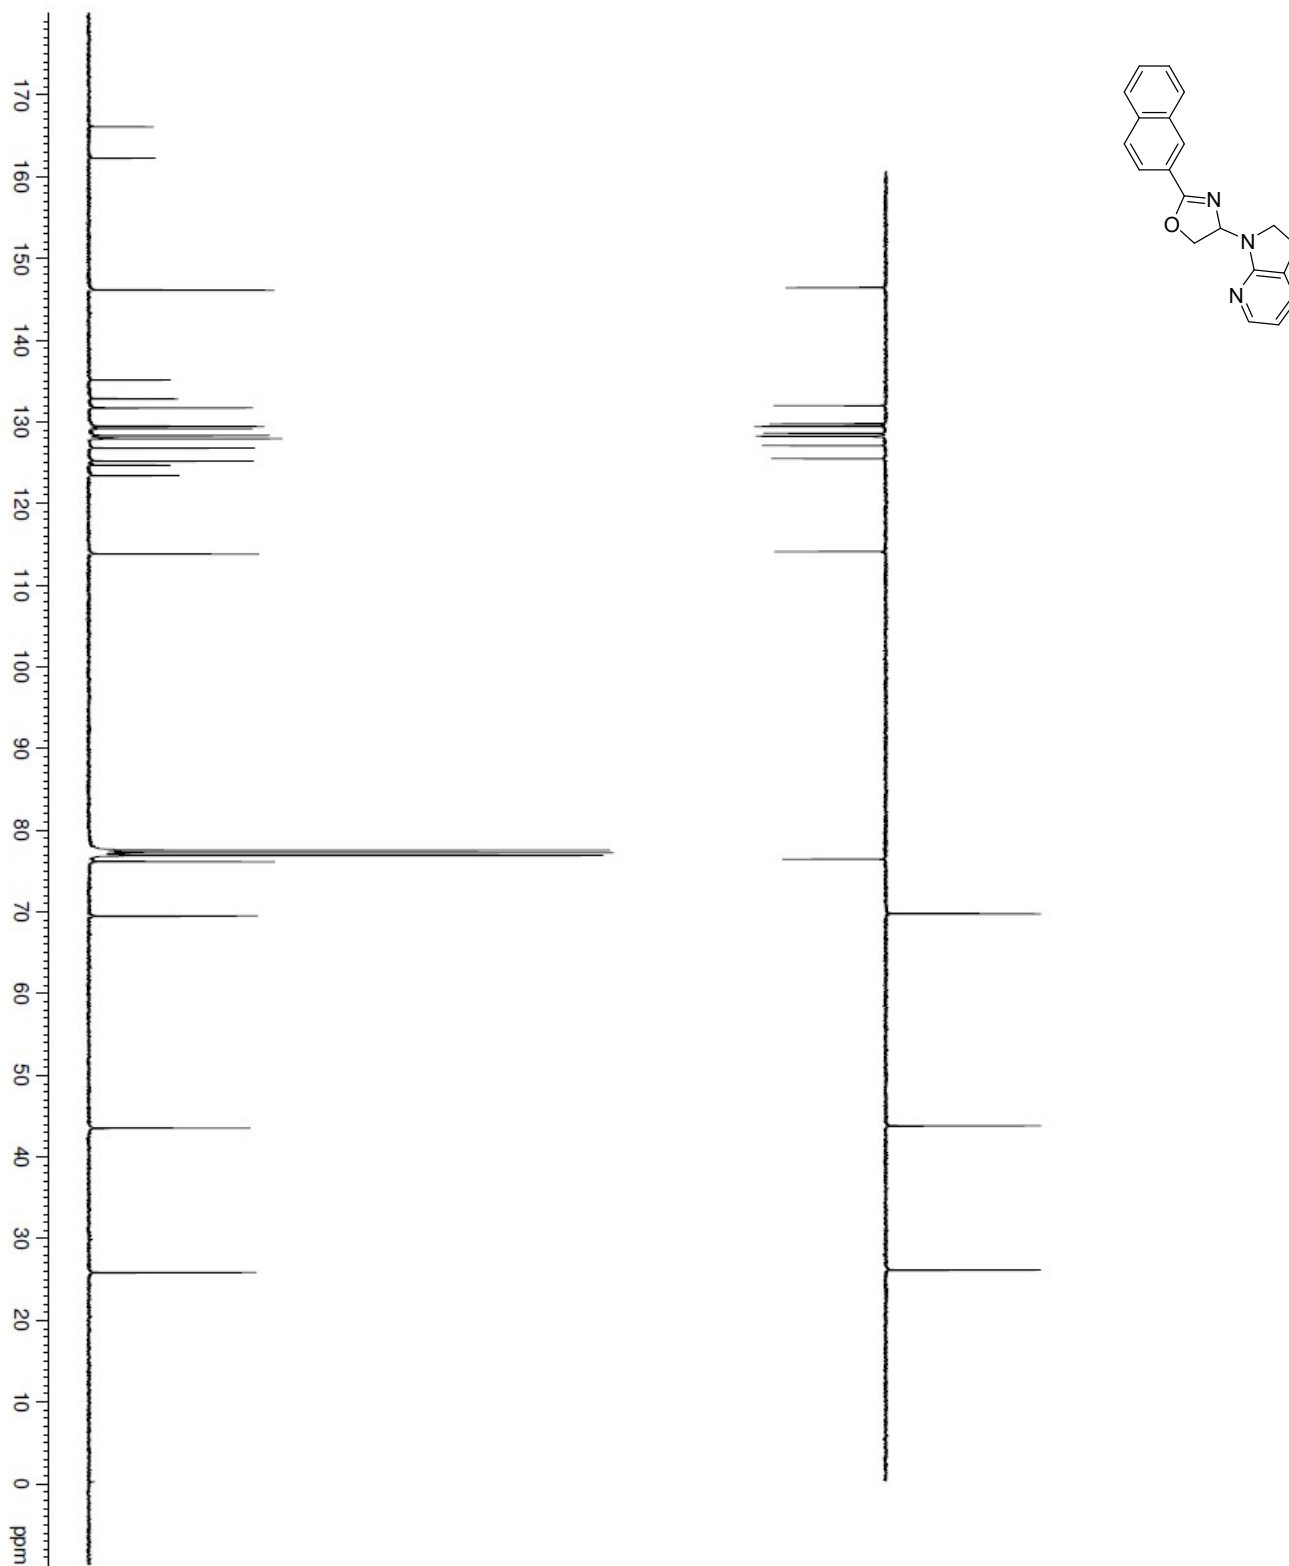

Figure 42.  $^1\text{H}$  NMR ( $\text{CDCl}_3$ ) of **7m**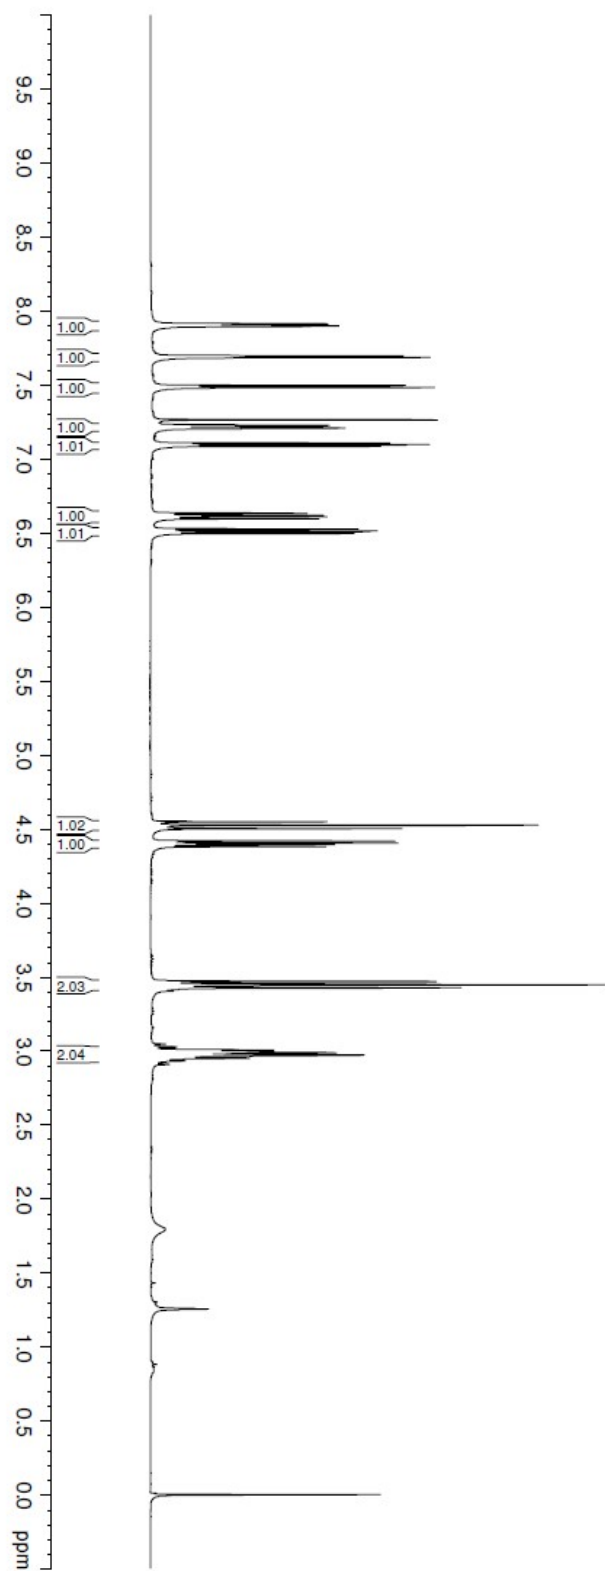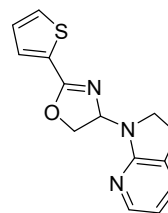

**Figure 43.**  $^{13}\text{C}$  NMR ( $\text{CDCl}_3$ ) of **7m**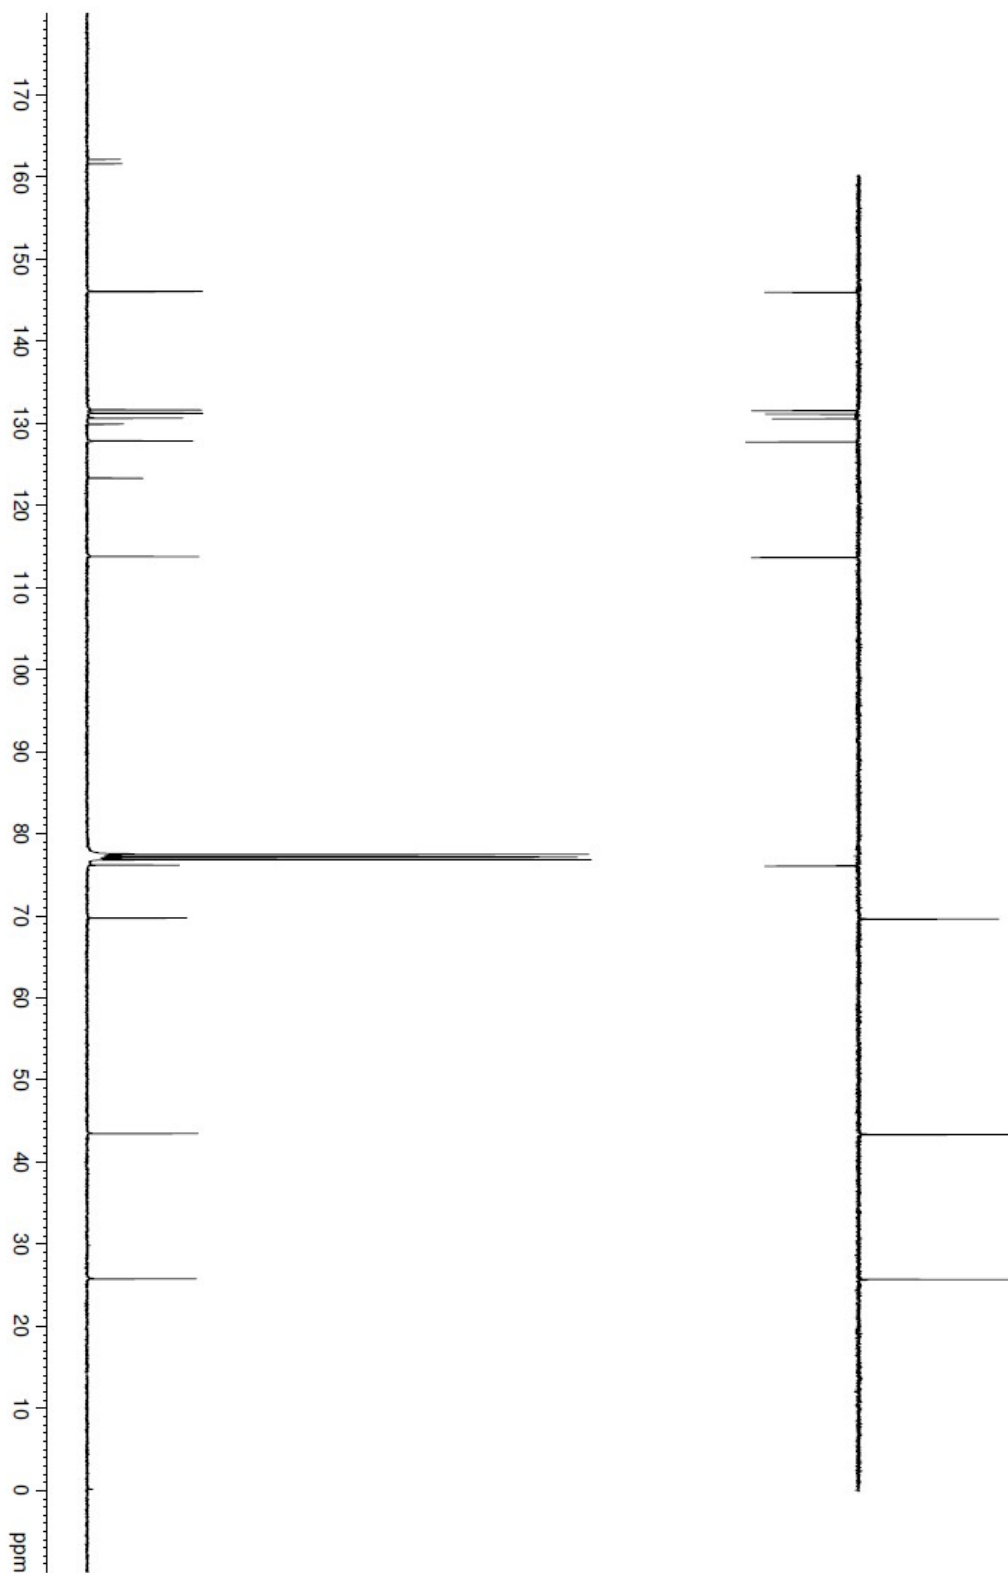

Hong et al.

Figure 44.  $^1\text{H}$  NMR

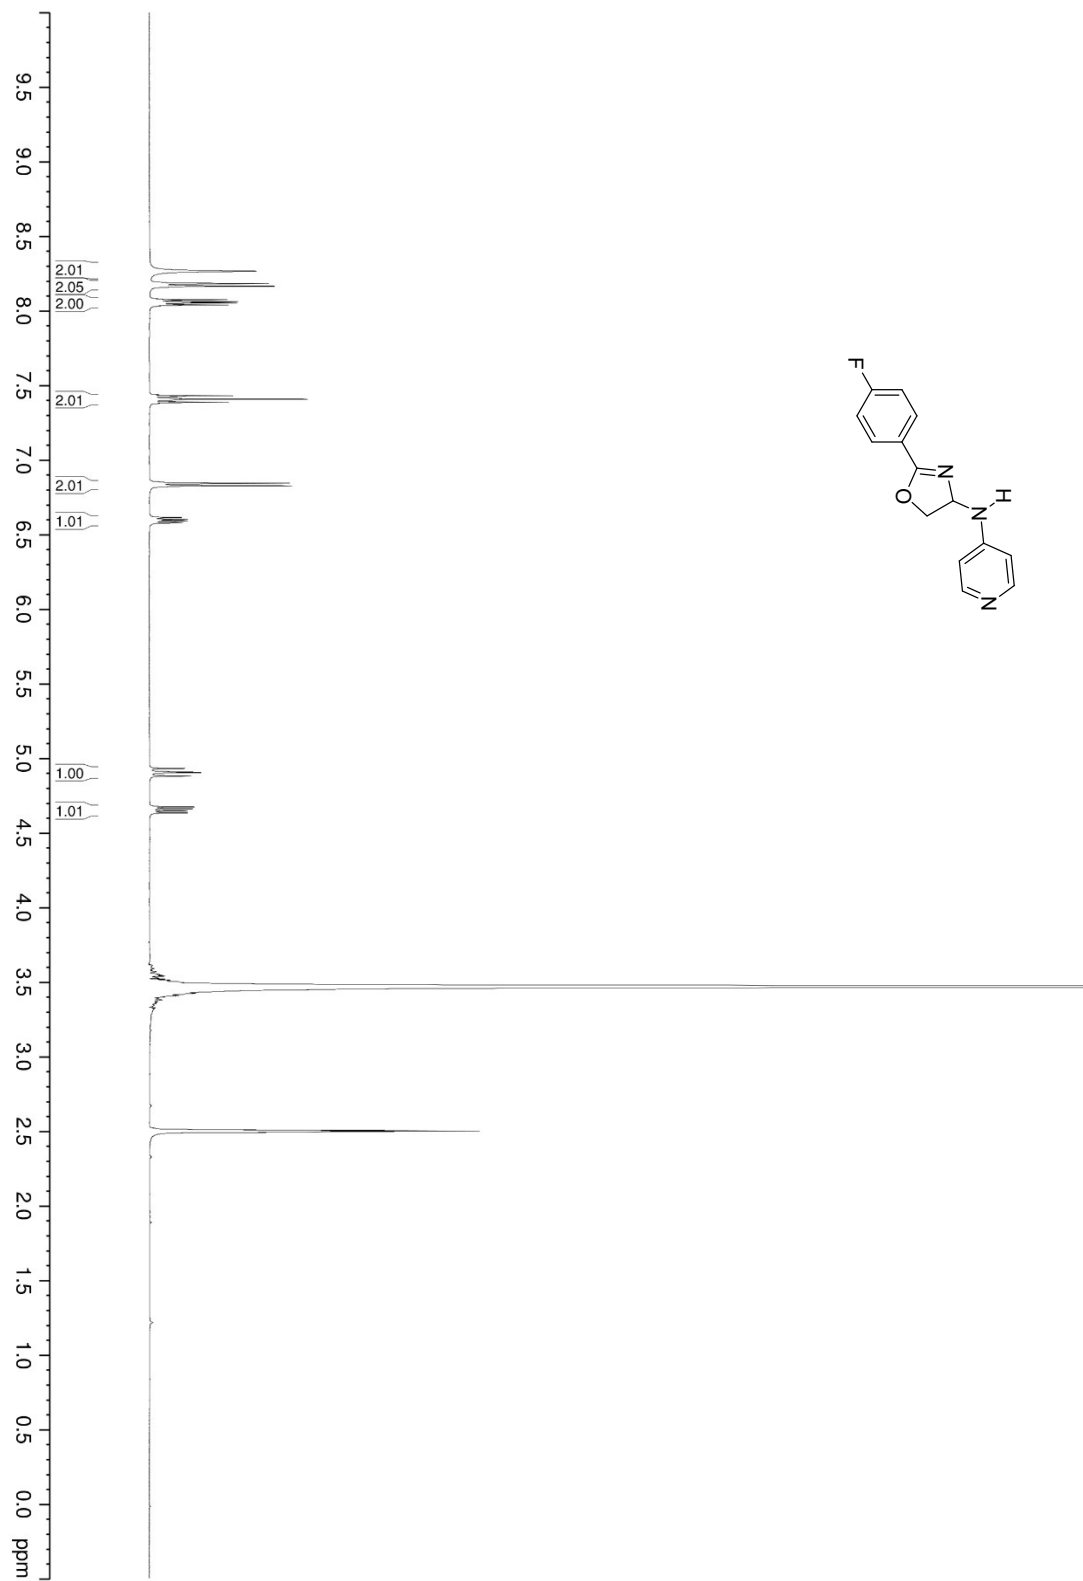

Hong et al.

Figure 45.  $^{13}\text{C}$  NMI

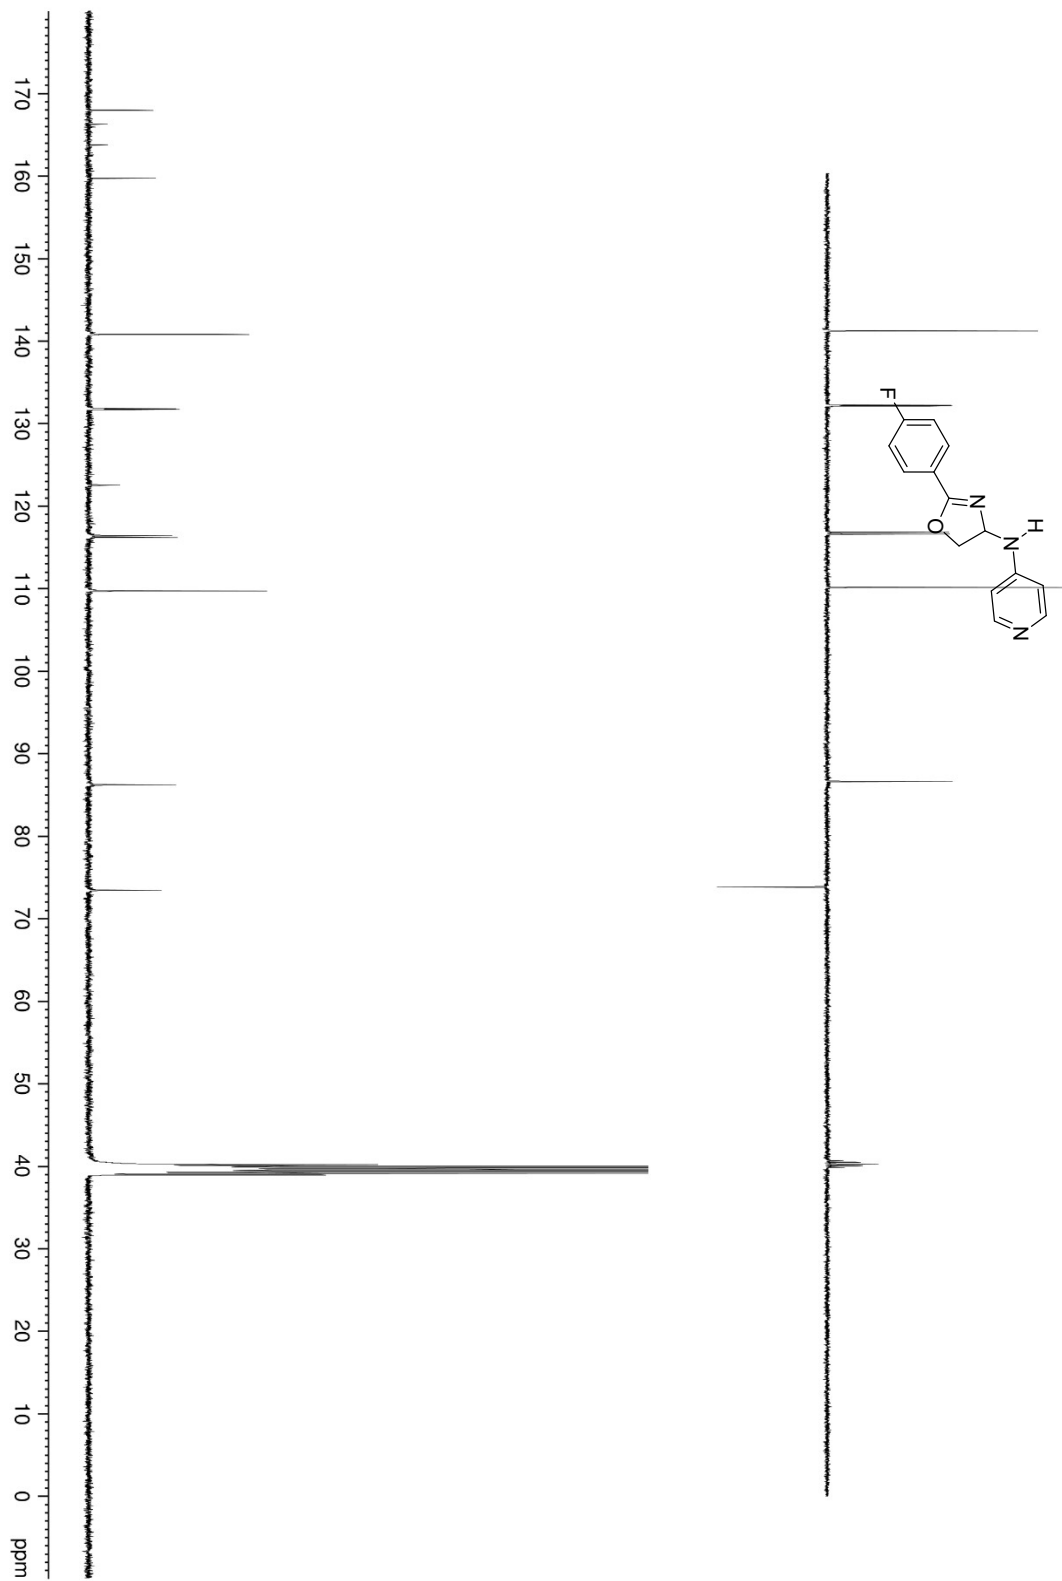

Hong et al.

Figure 46.  $^{19}\text{F}$  NMR

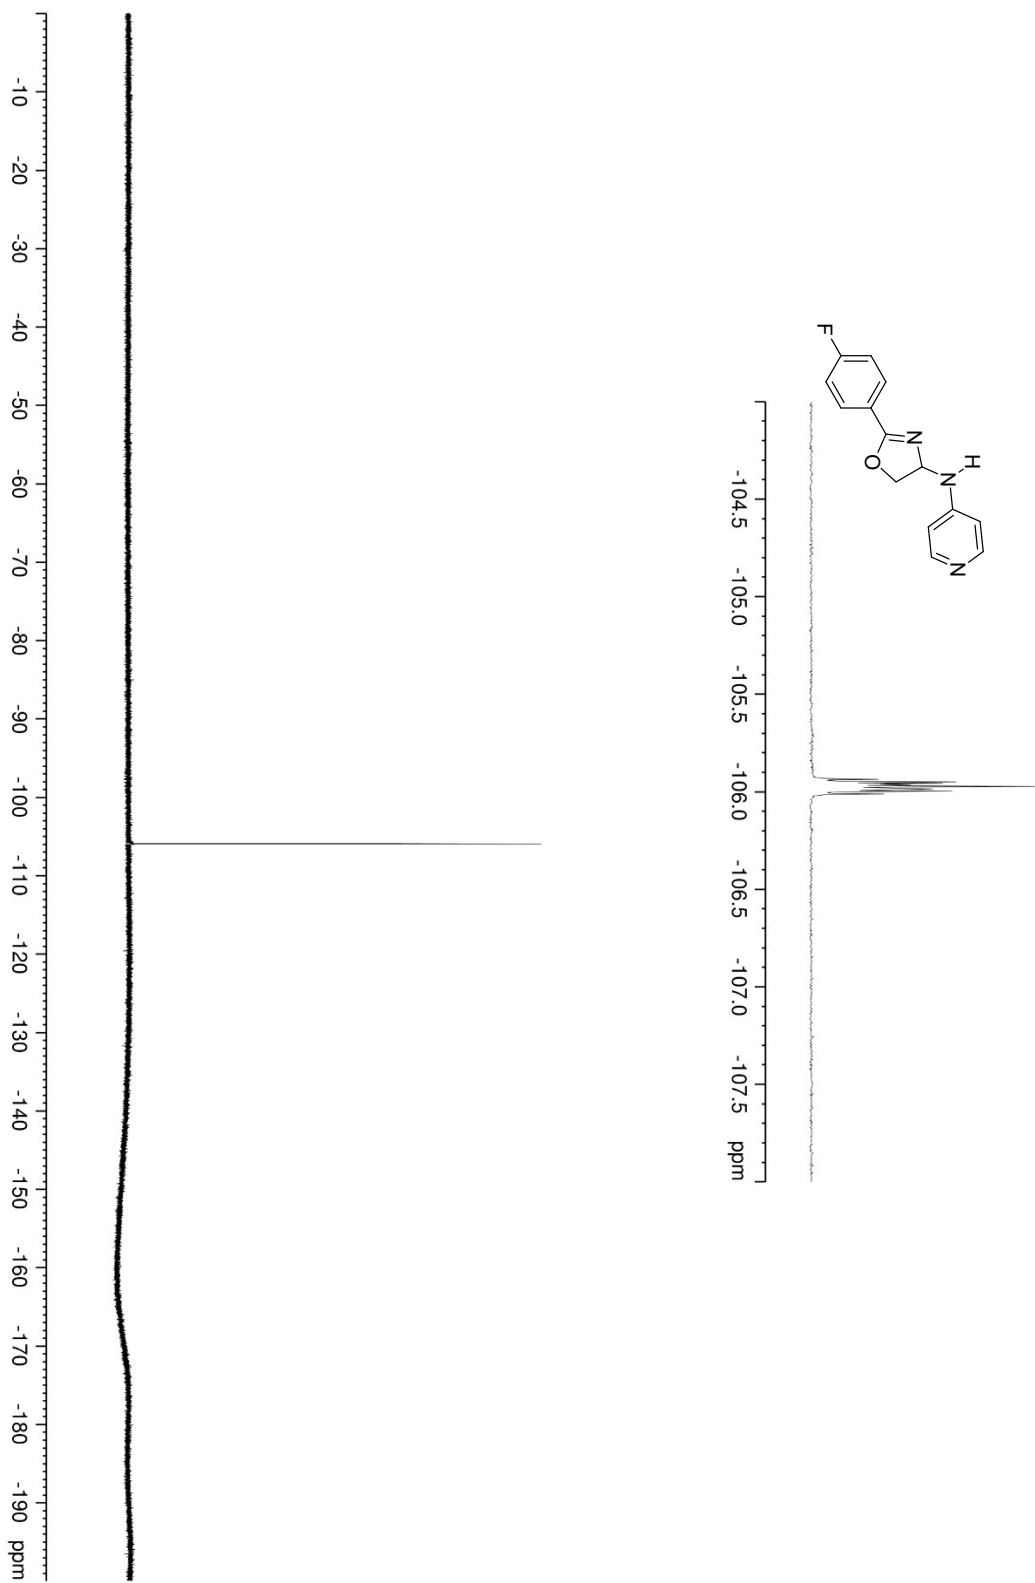

Hong et al.

Figure 47.  $^1\text{H}$  NMR

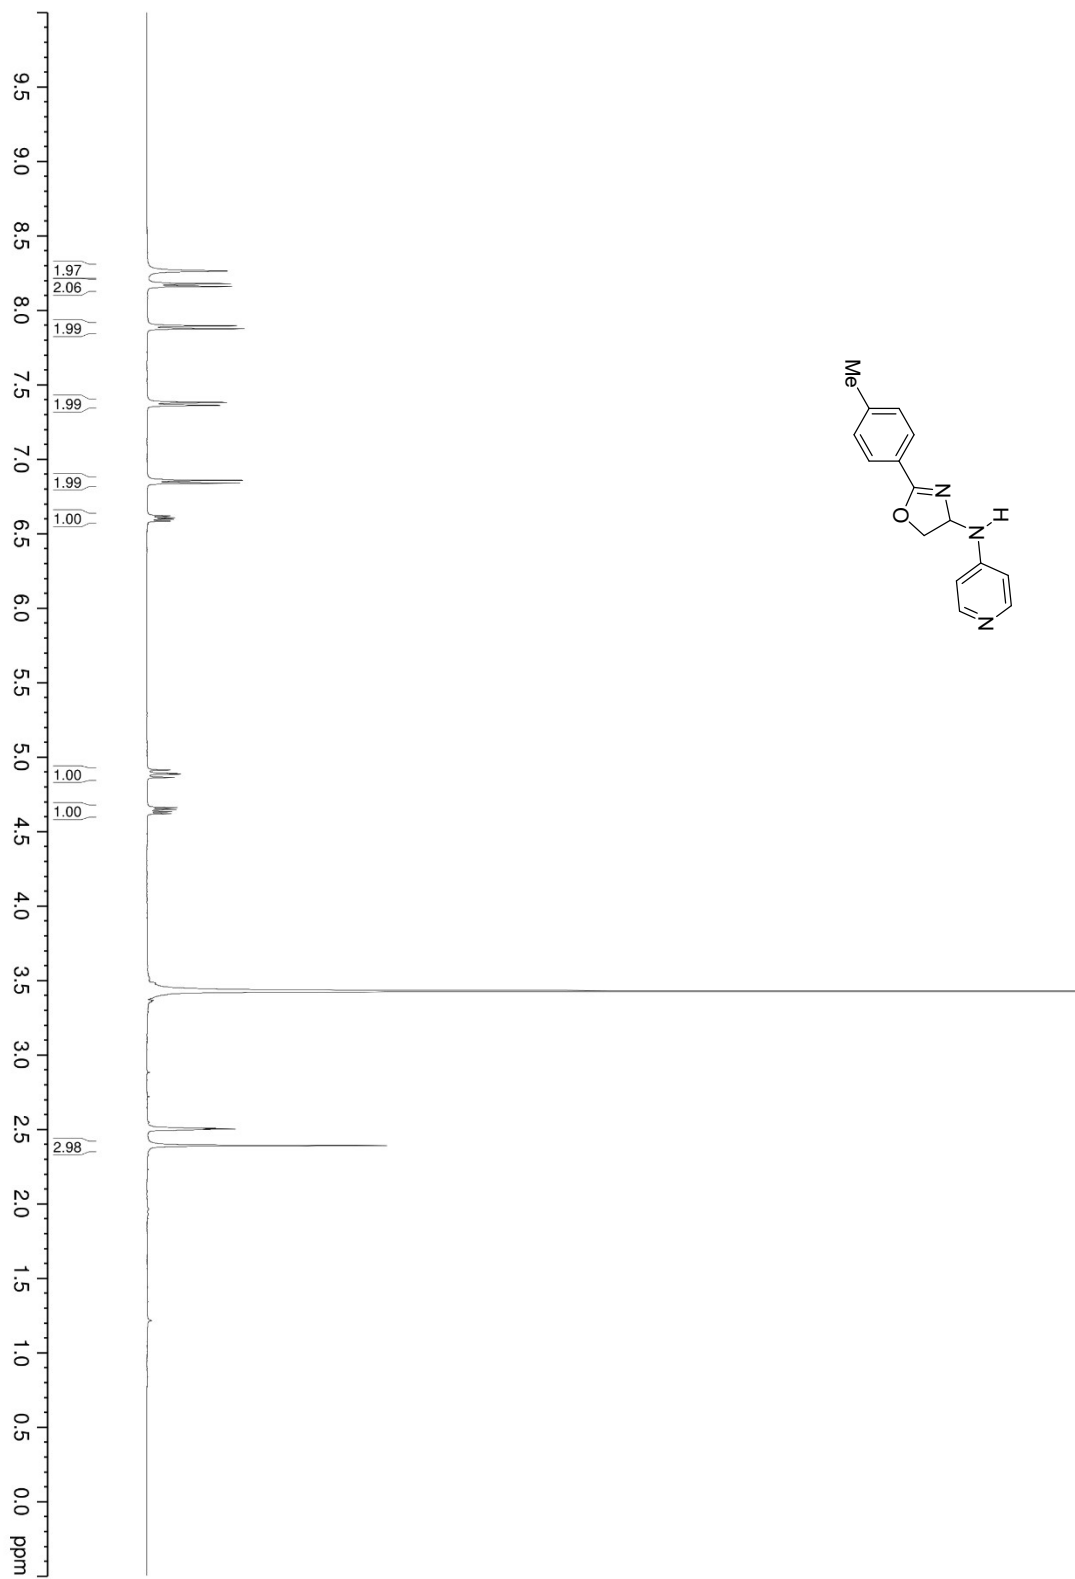

Hong et al.

Figure 48.  $^{13}\text{C}$  NMI

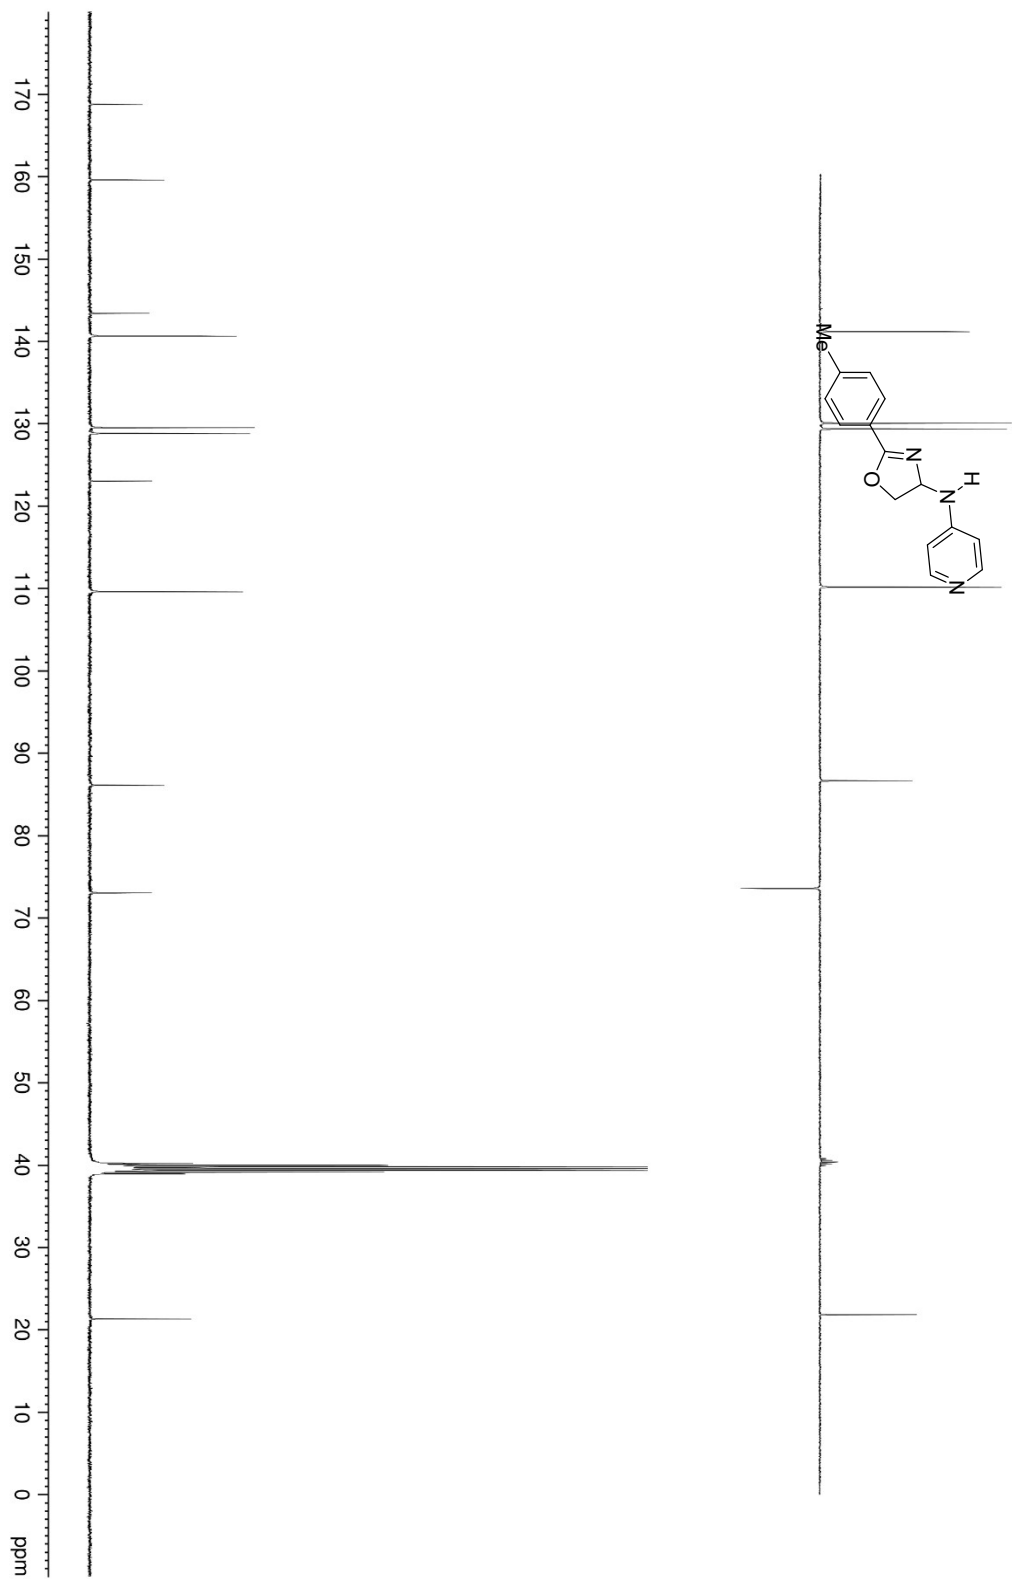

Figure 49.  $^1\text{H}$  NMR (MeOD- $d_4$ ) of **81**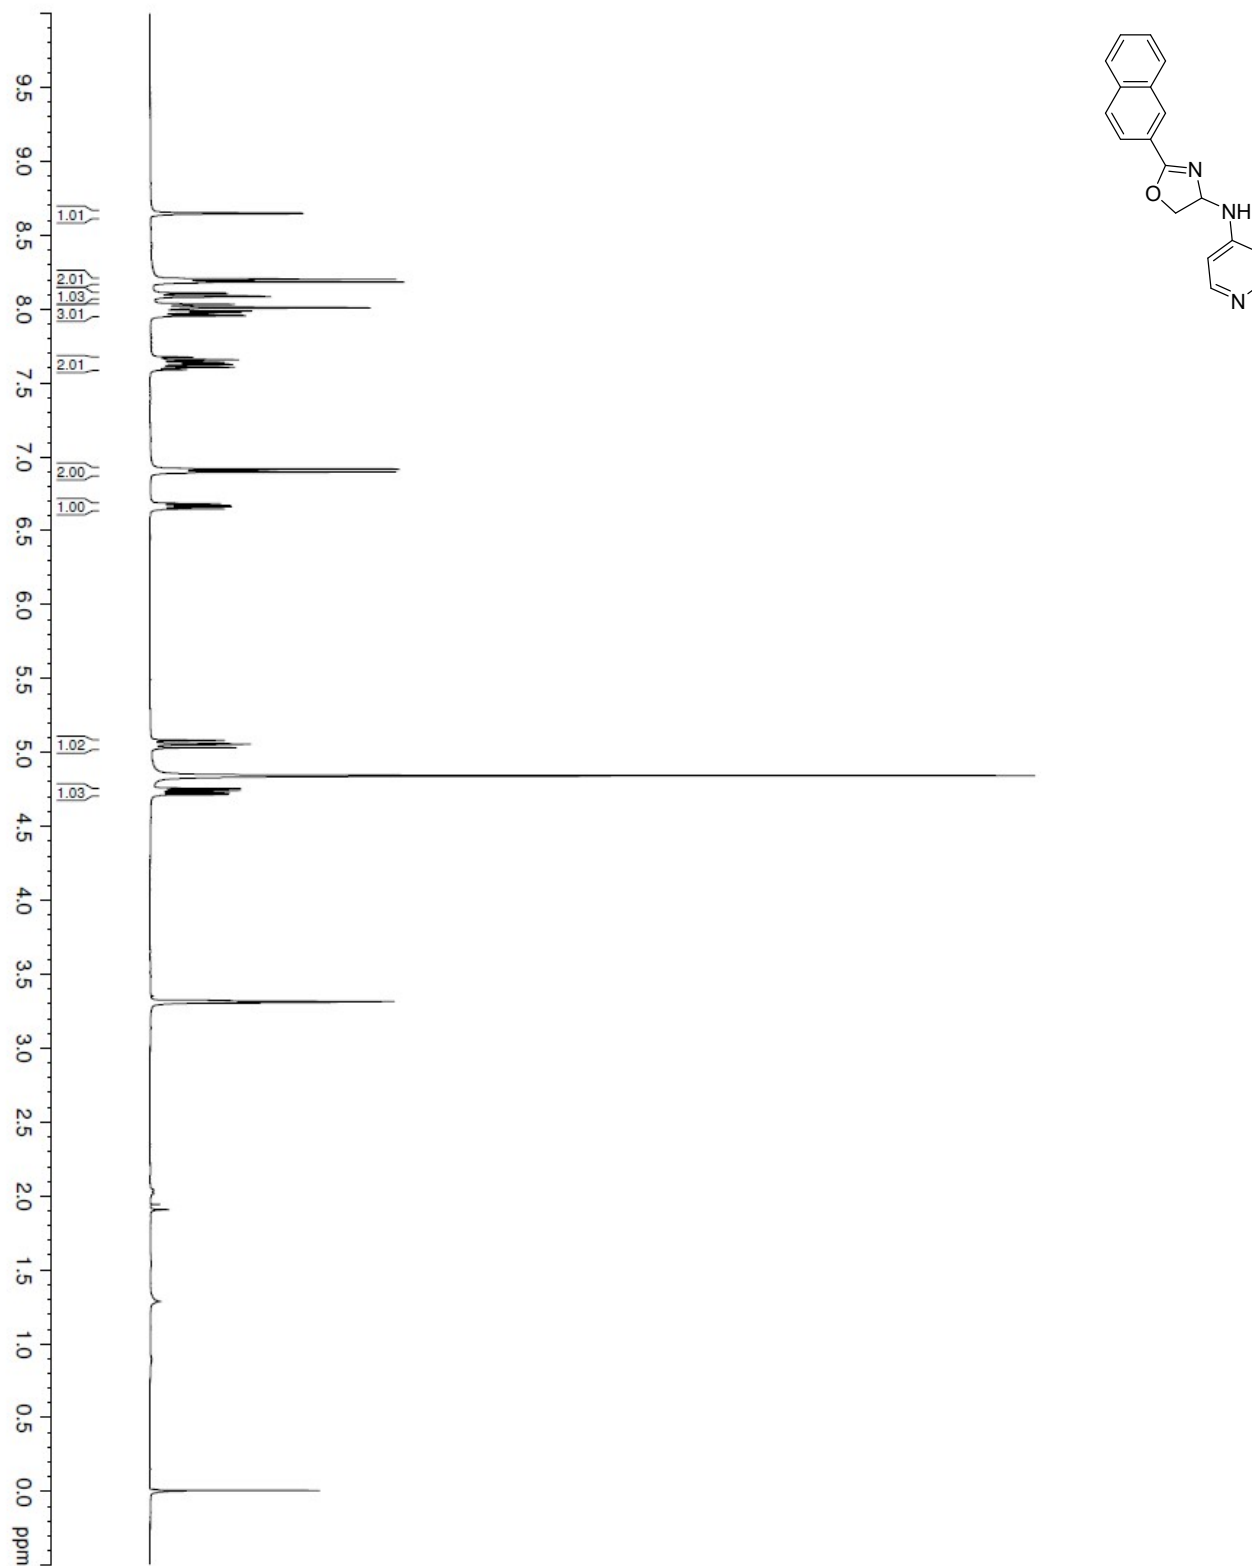

**Figure 50.**  $^{13}\text{C}$  NMR (MeOD- $d_4$ ) of **8I**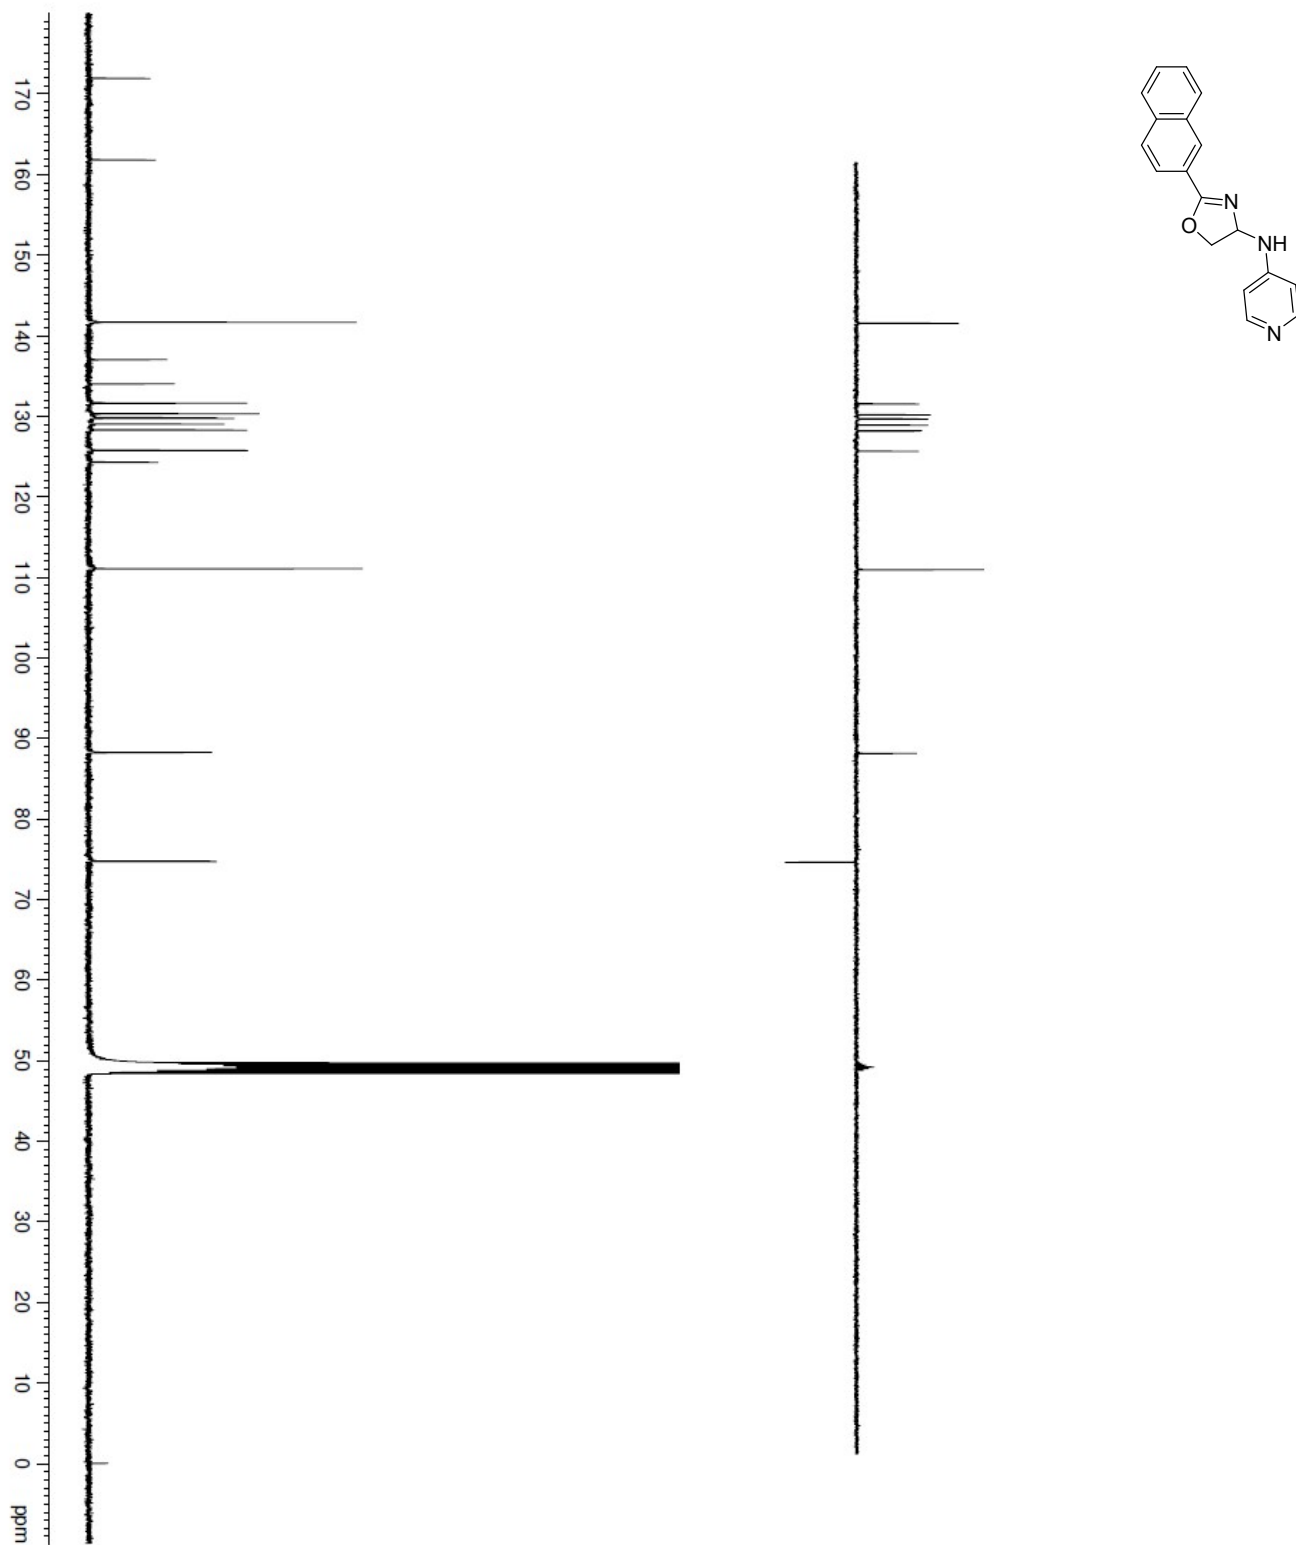

Hong et al.

Figure 51.  $^1\text{H}$  NMR

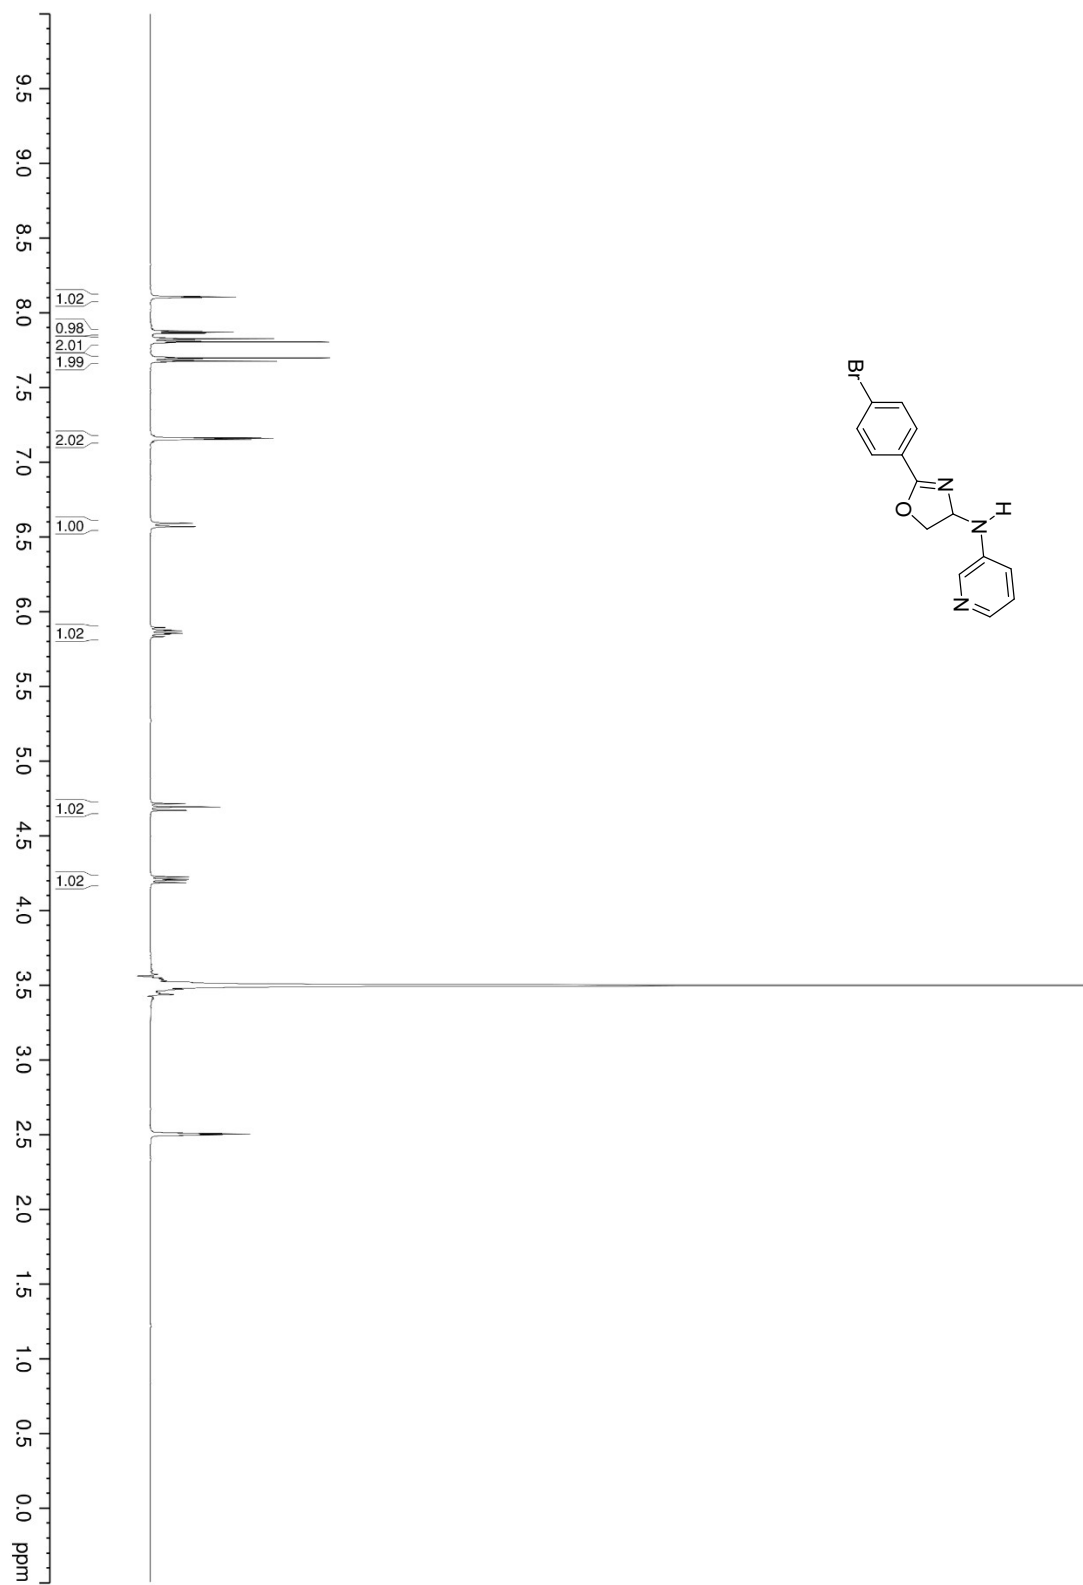

Hong et al.

Figure 52.  $^{13}\text{C}$  NMI

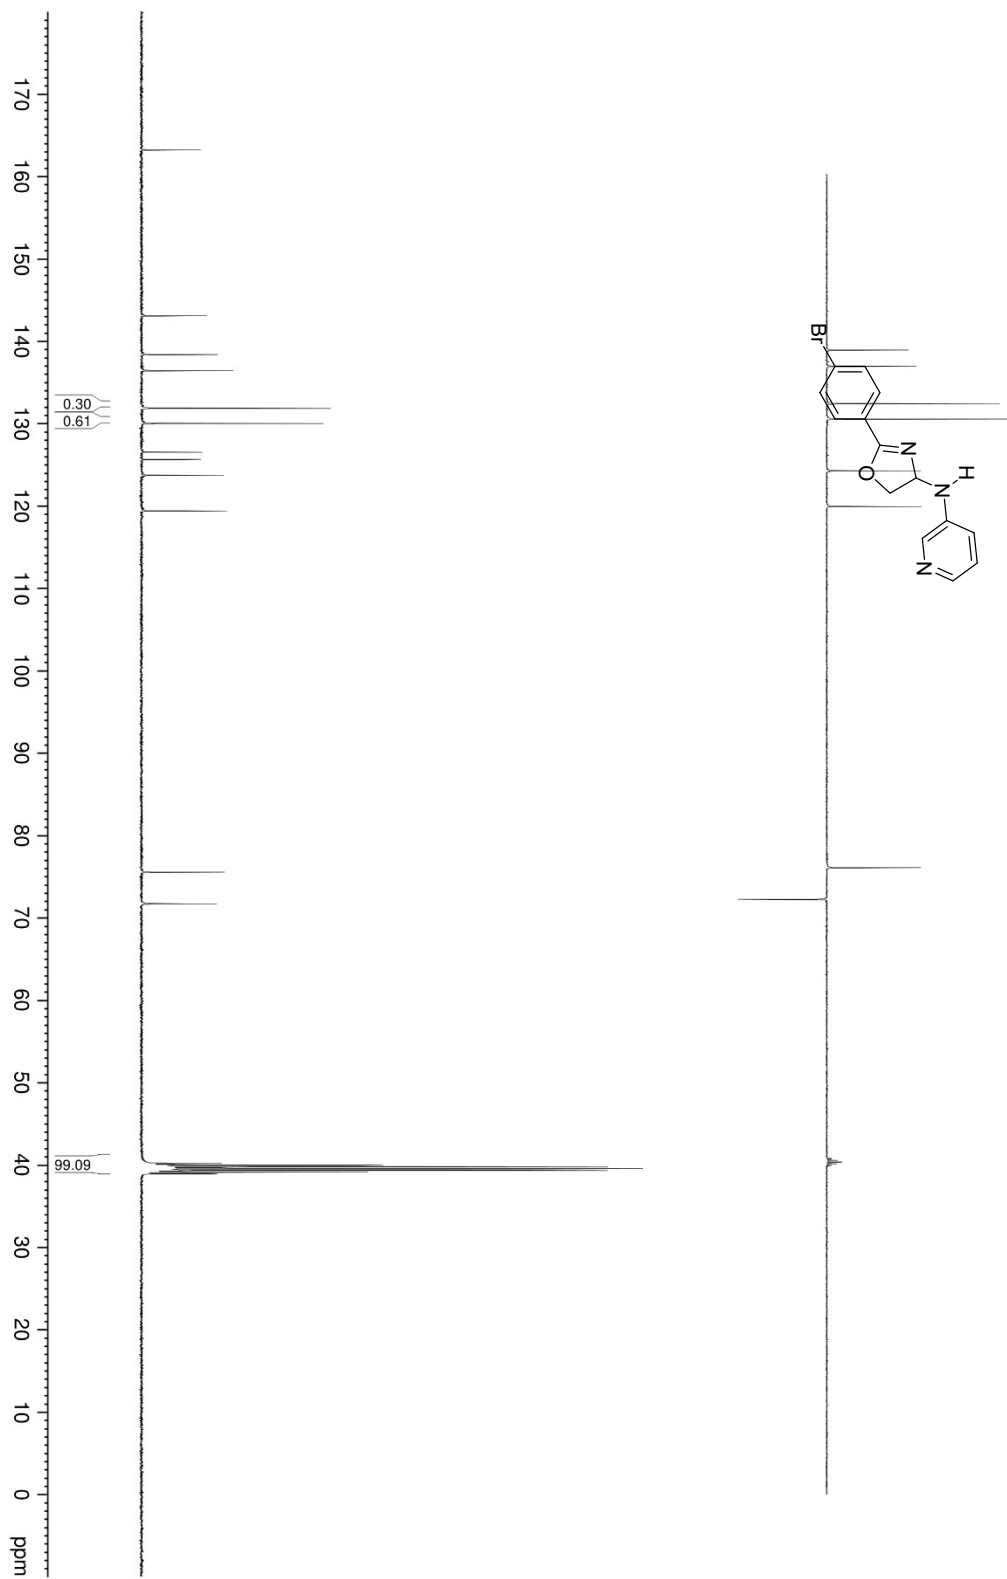

Hong et al.

Figure 53.  $^1\text{H}$  NMR

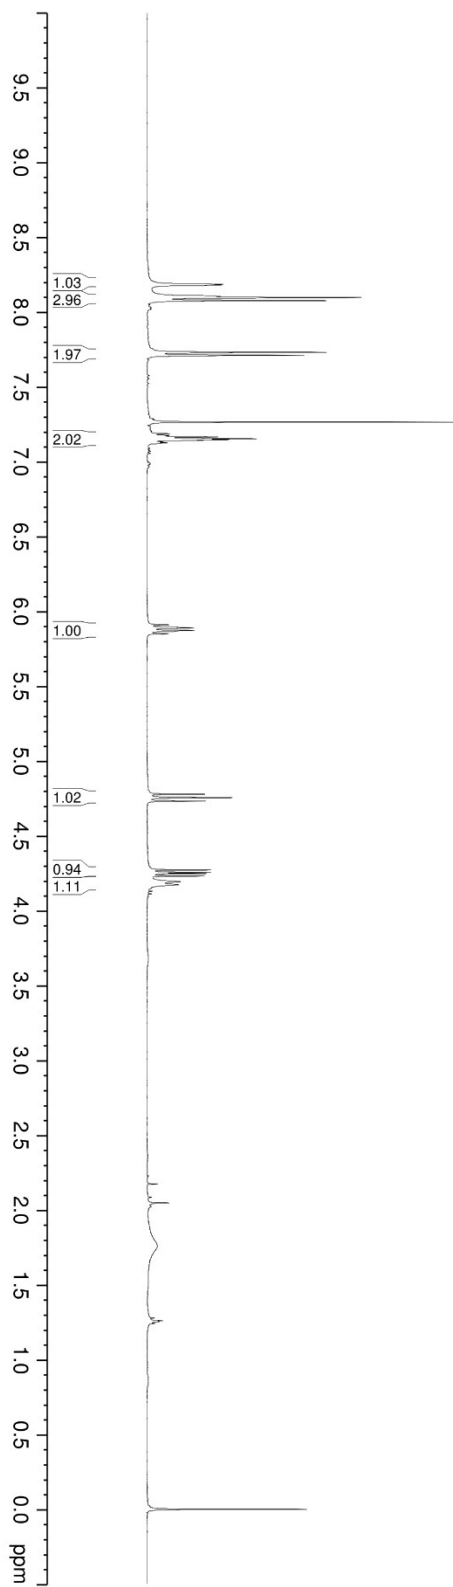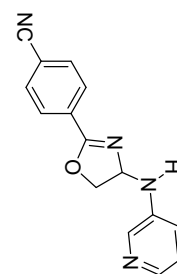

Hong et al.

Figure 54.  $^{13}\text{C}$  NMI

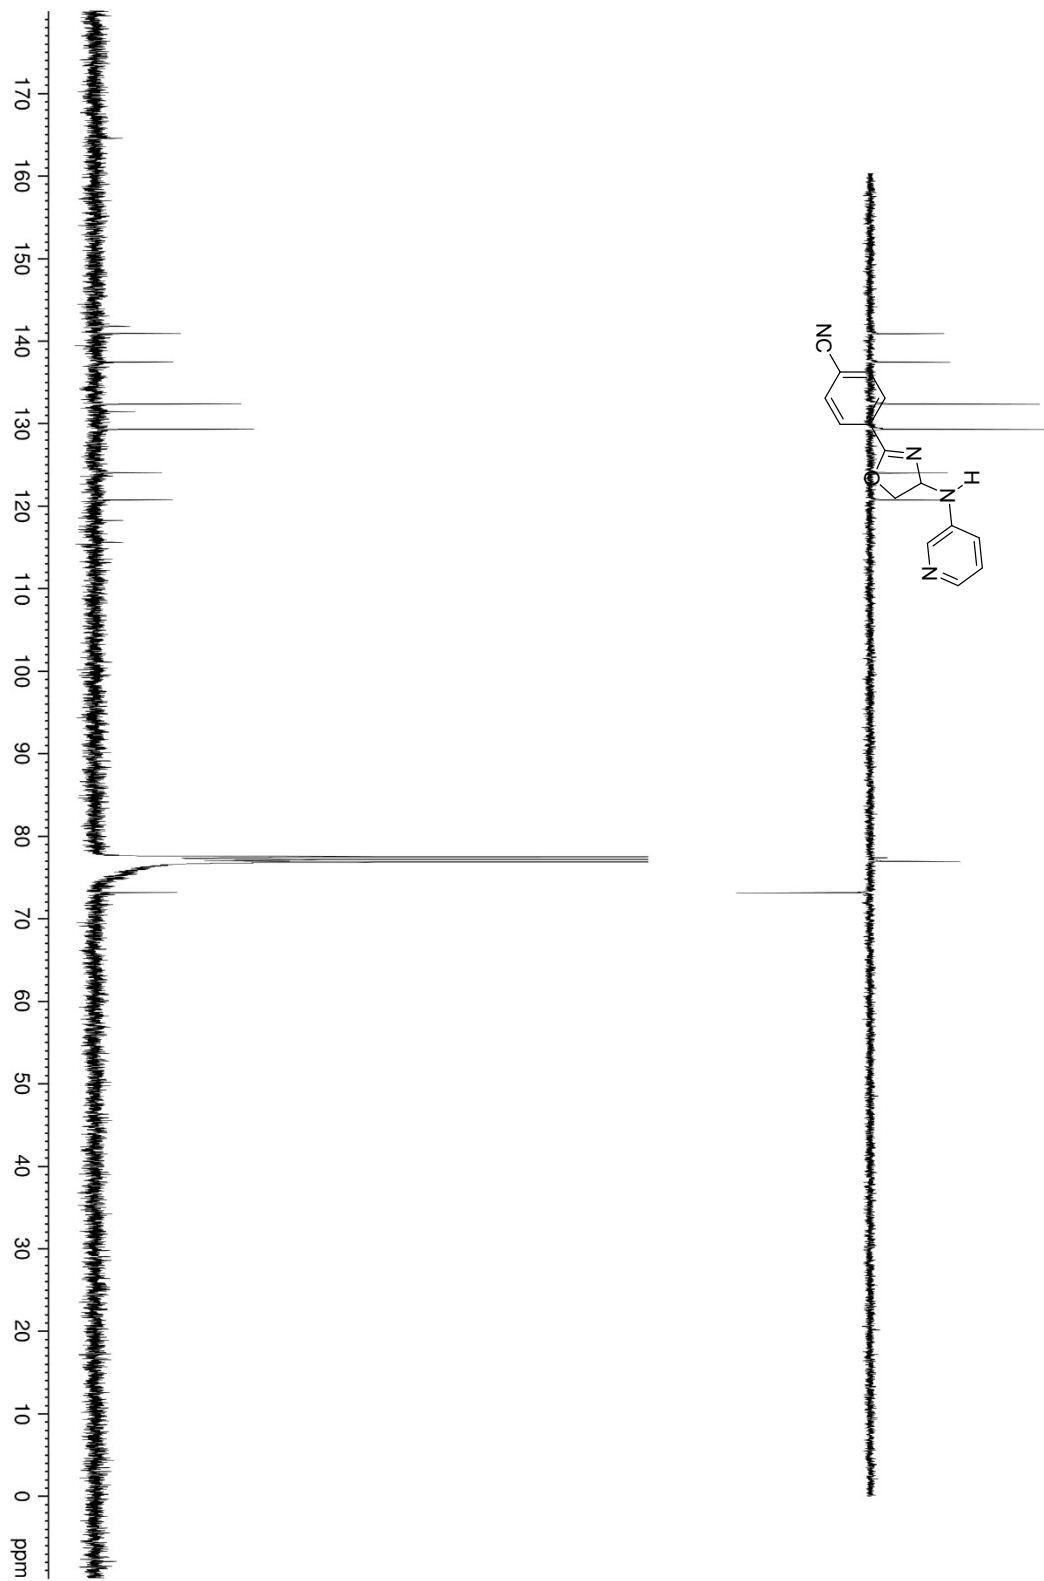

Hong et al.

Figure 55.  $^1\text{H}$  NMR

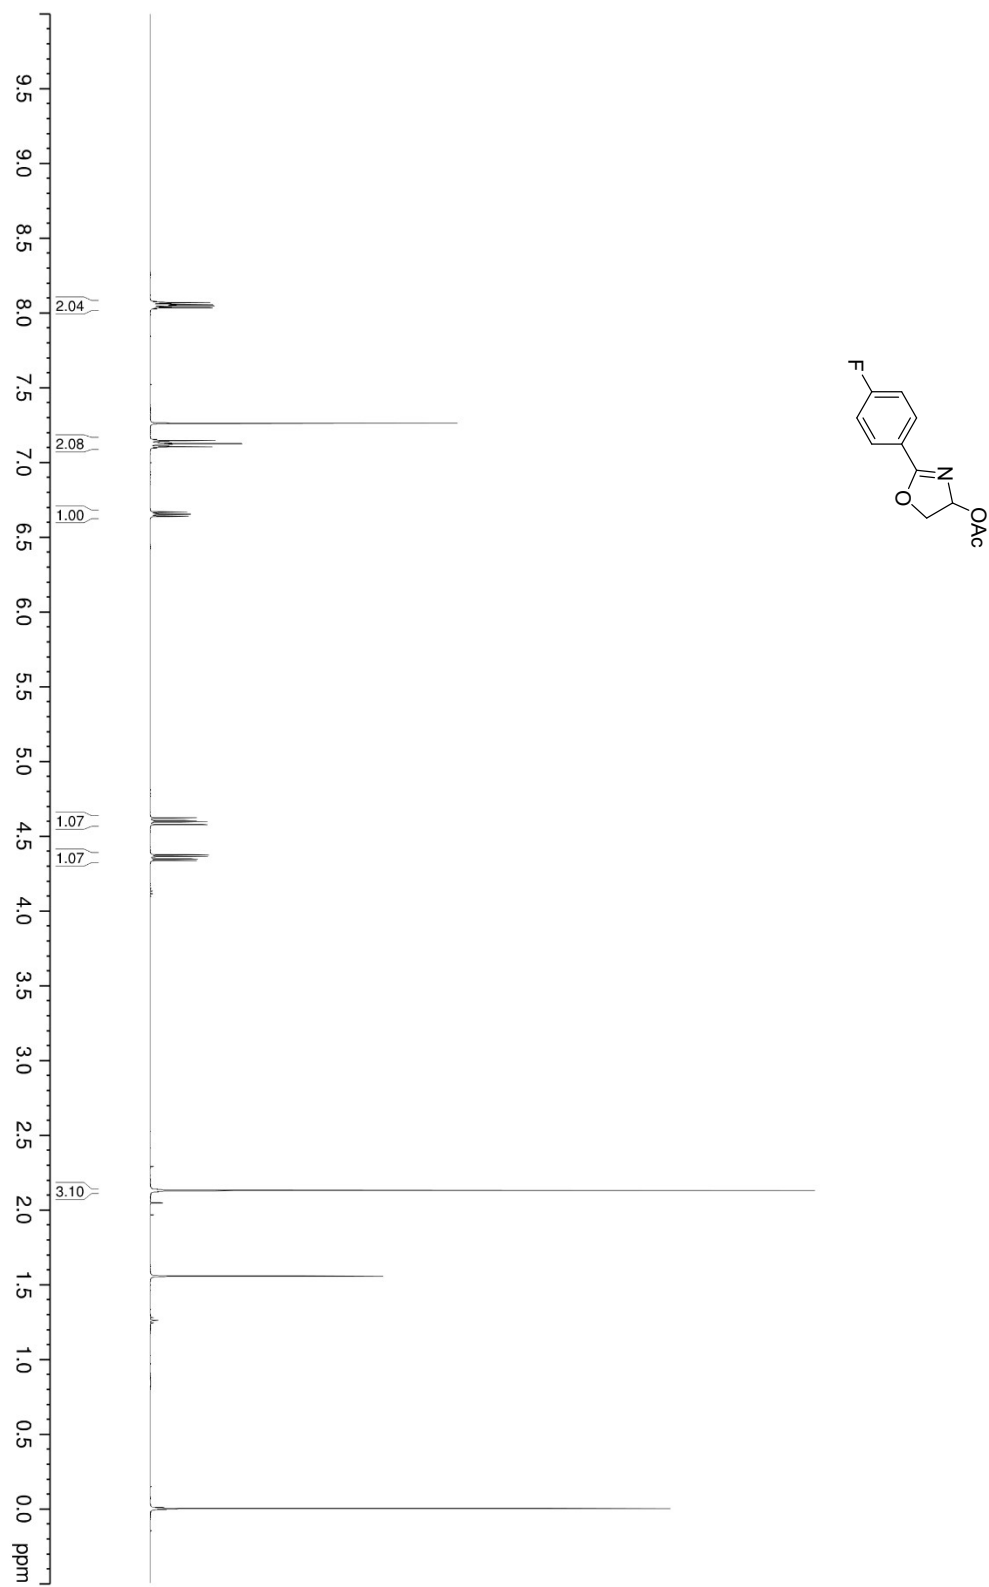

Hong et al.

Figure 56.  $^{13}\text{C}$  NMI

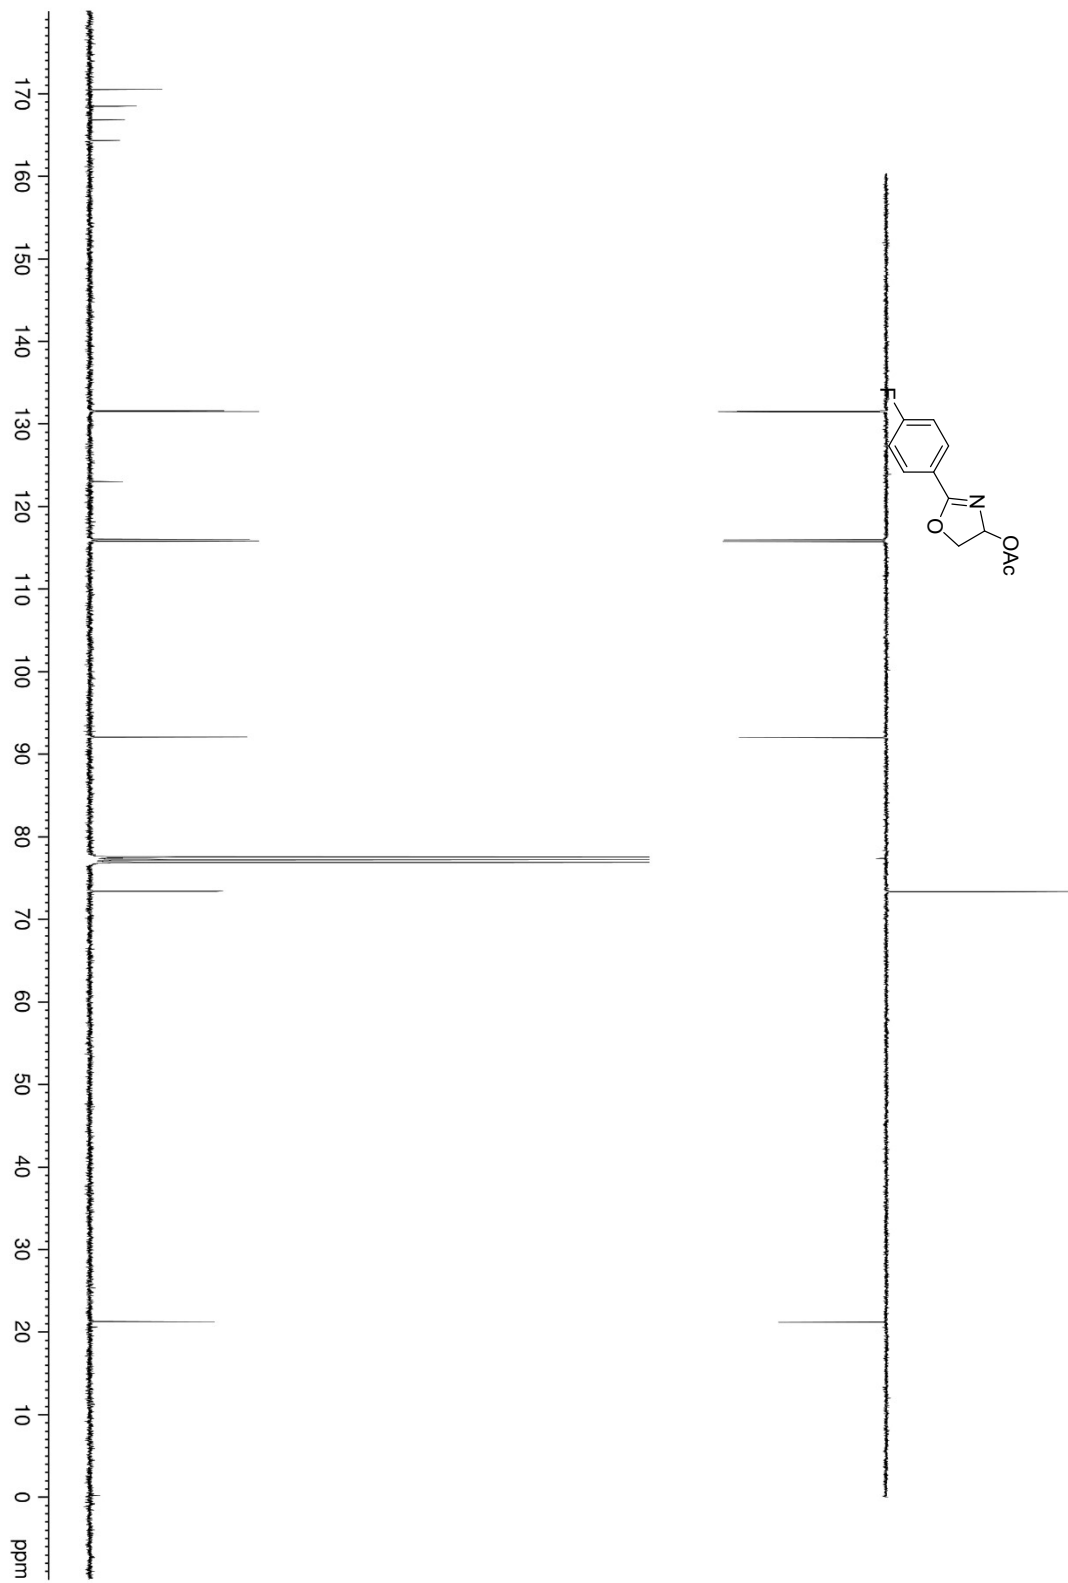

Hong et al.

Figure 57.  $^{19}\text{F}$  NMR

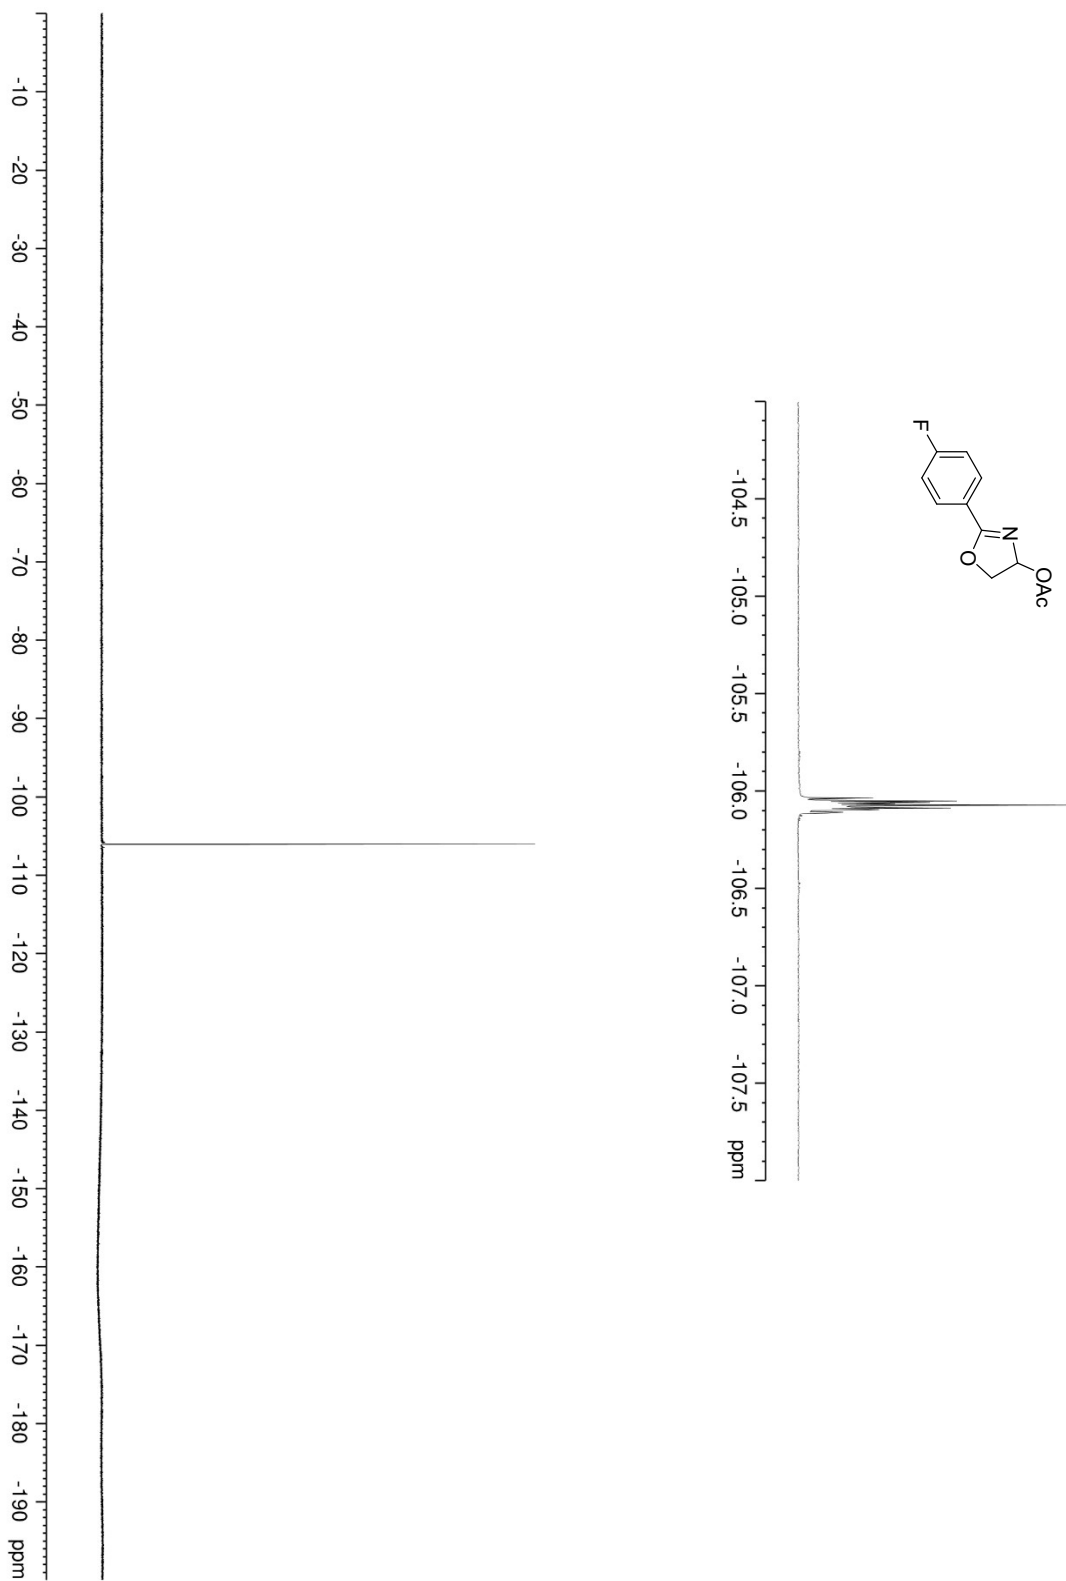

Hong et al.

Figure 58.  $^1\text{H}$  NMR

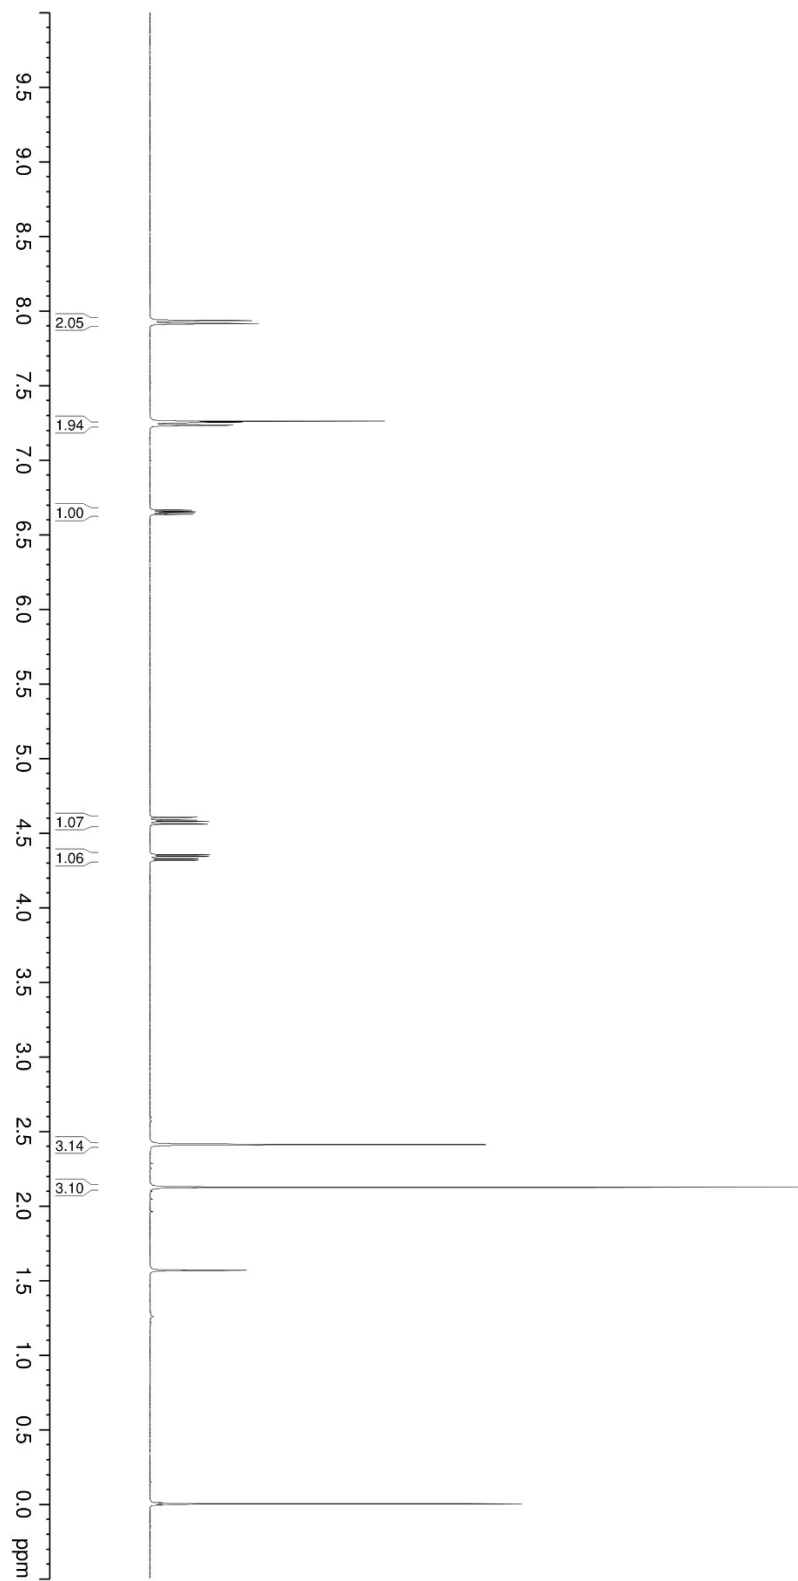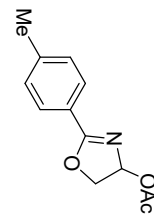

Hong et al.

Figure 59.  $^{13}\text{C}$  NMI

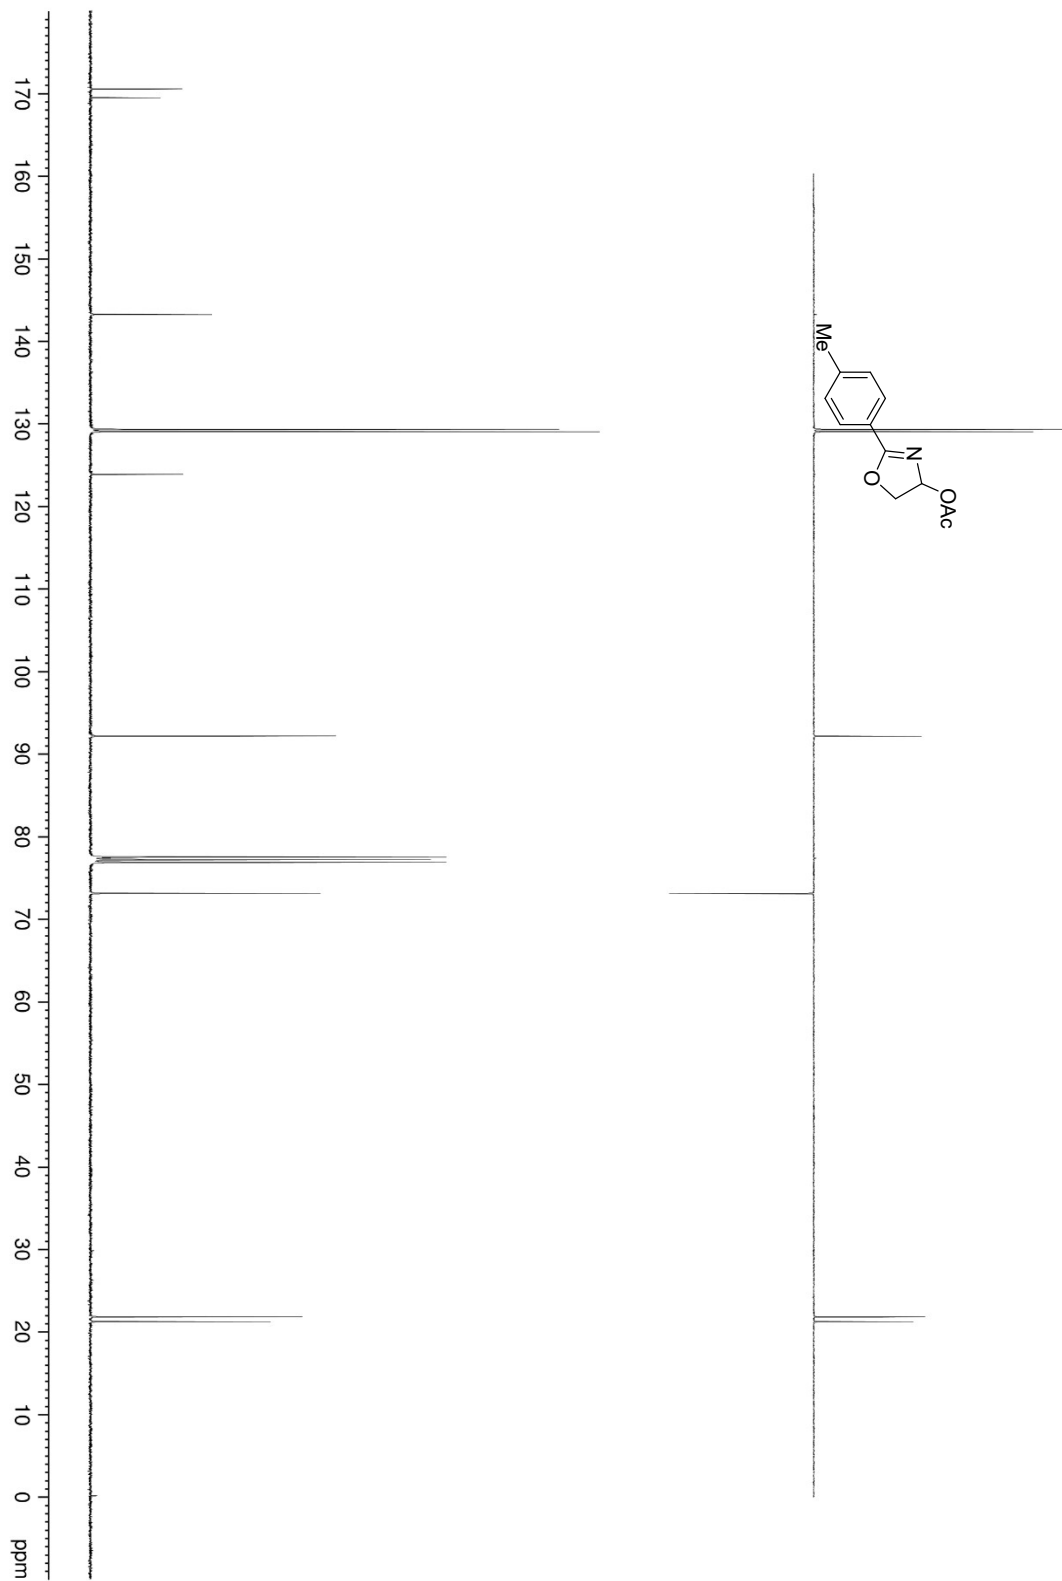

Hong et al.

Figure 60.  $^1\text{H}$  NMR

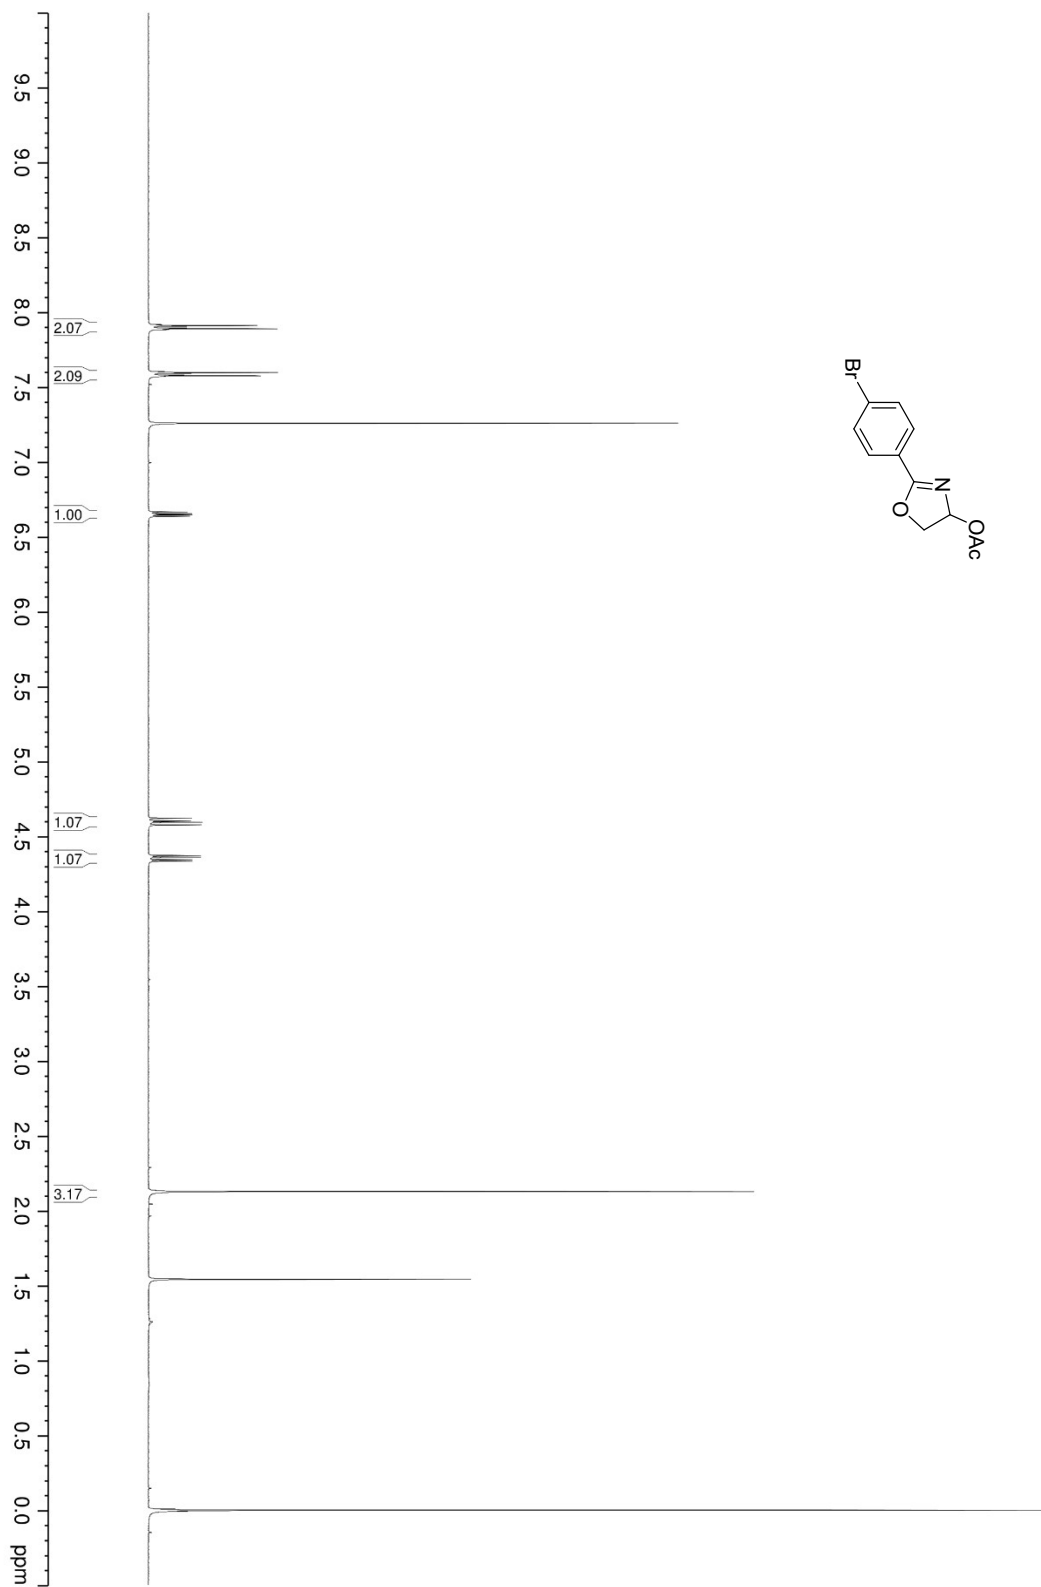

Hong et al.

Figure 61.  $^{13}\text{C}$  NMI

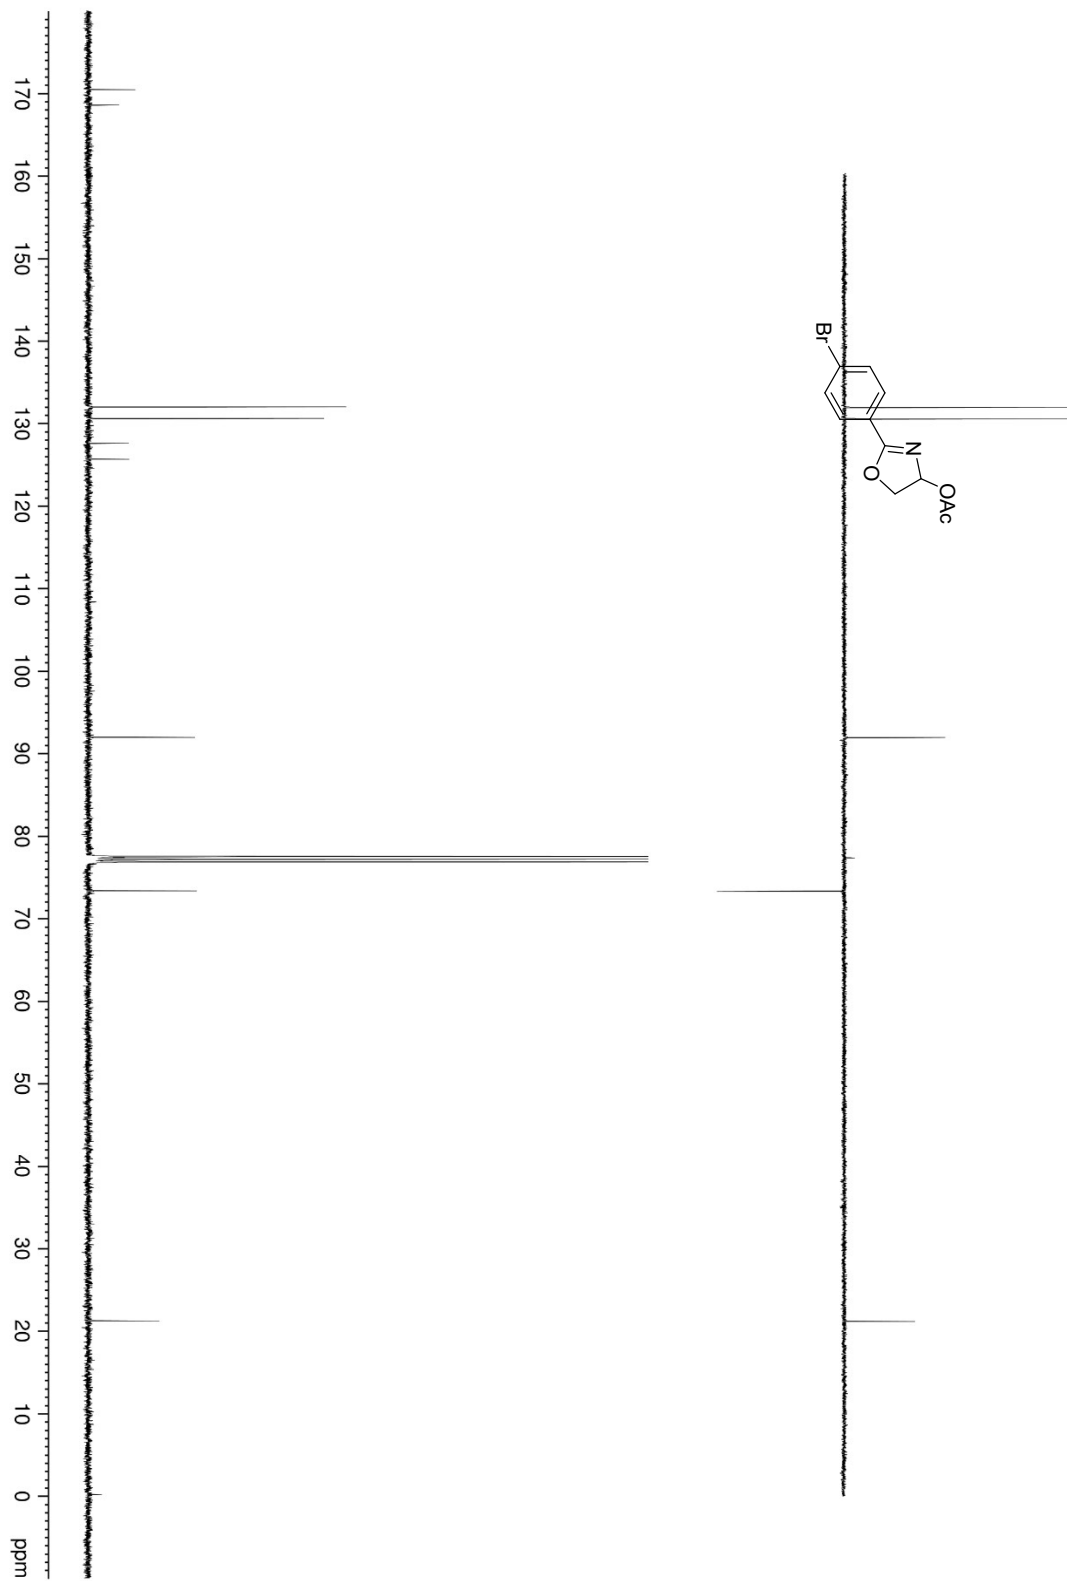

Hong et al.

Figure 62.  $^1\text{H}$  NMR

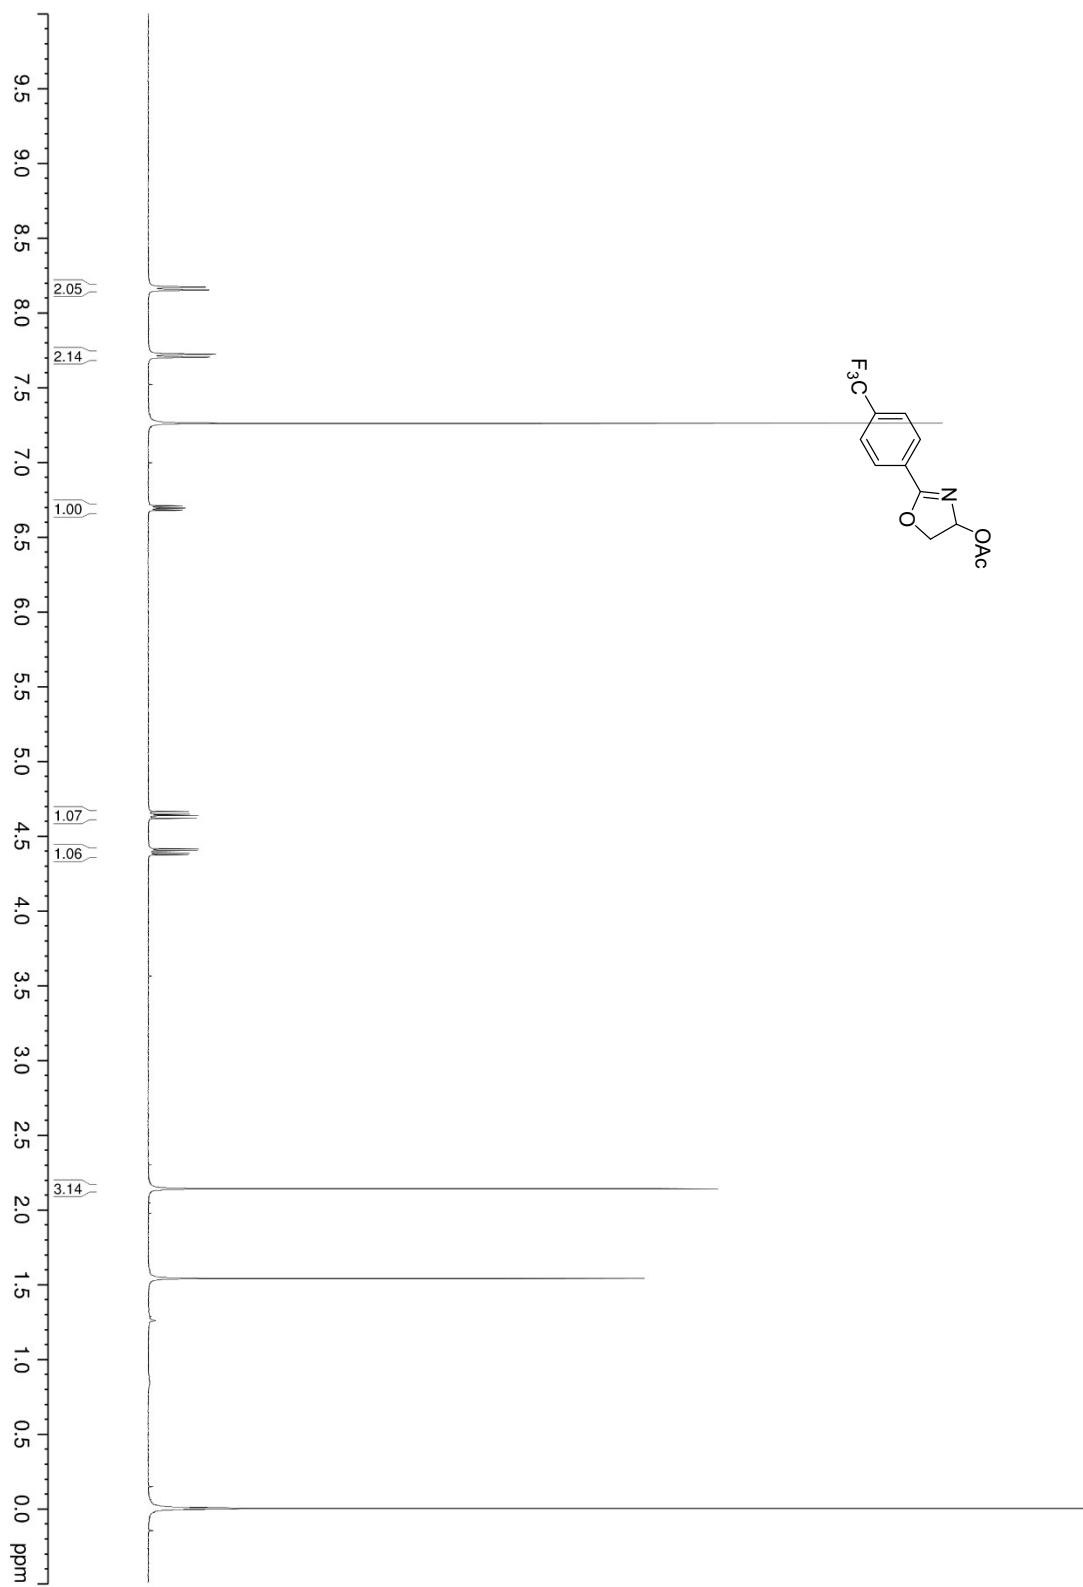

Hong et al.

Figure 63.  $^{13}\text{C}$  NMR

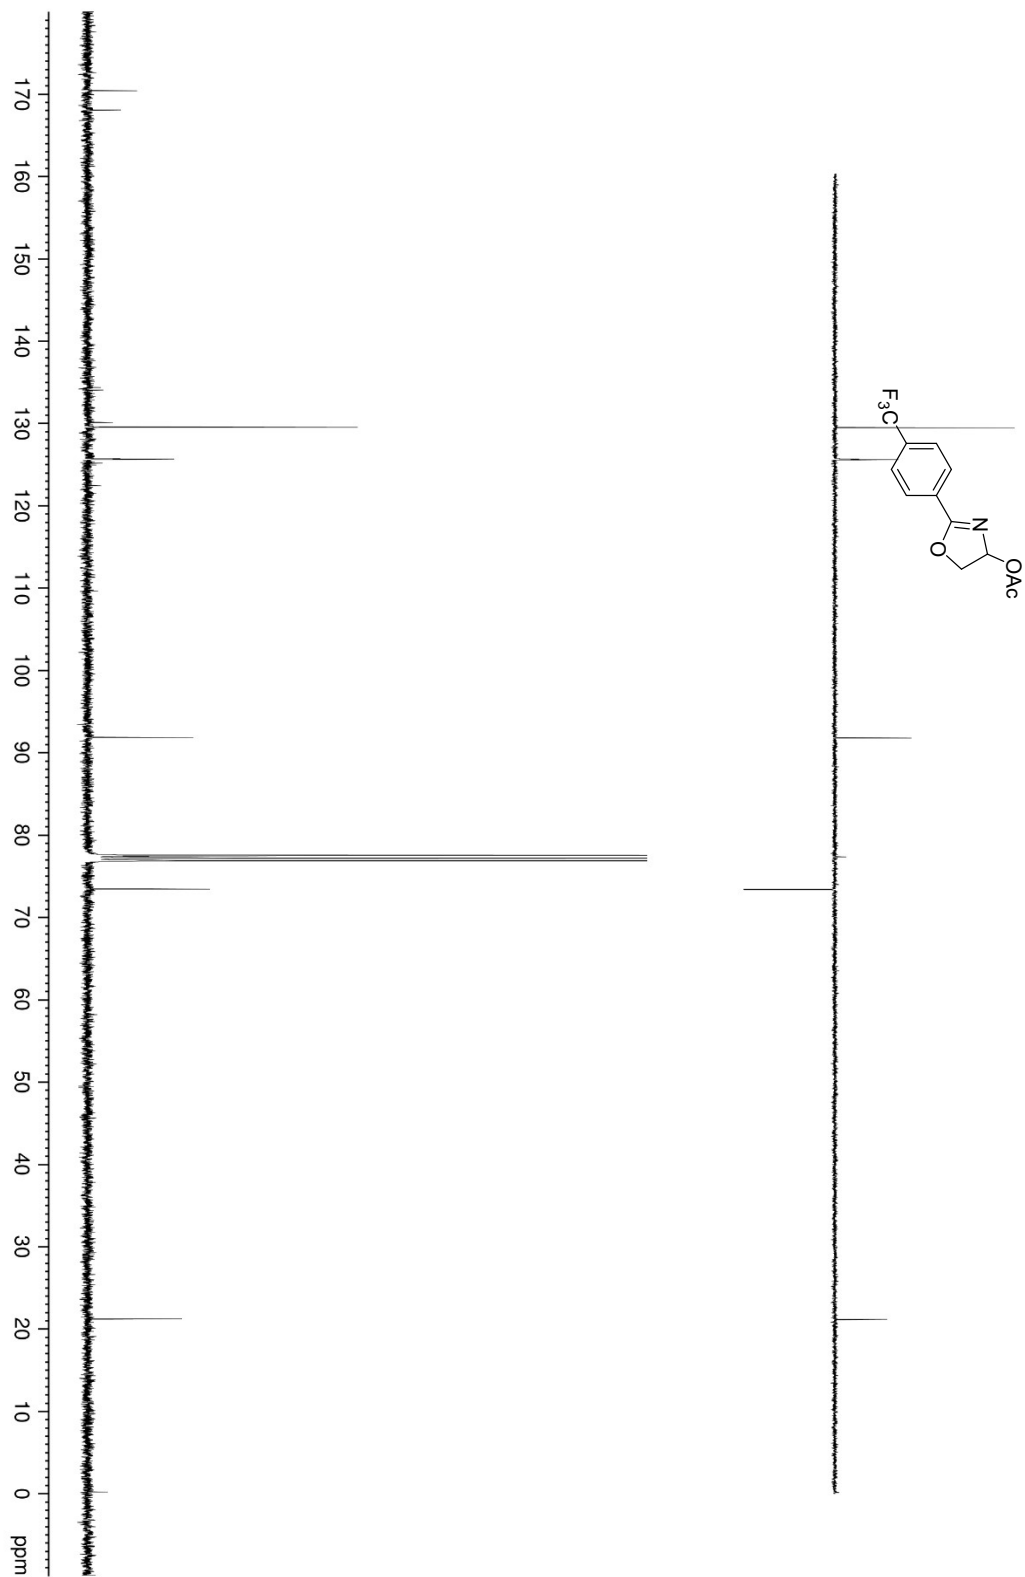

Hong et al.

Figure 64.  $^{19}\text{F}$  NMR

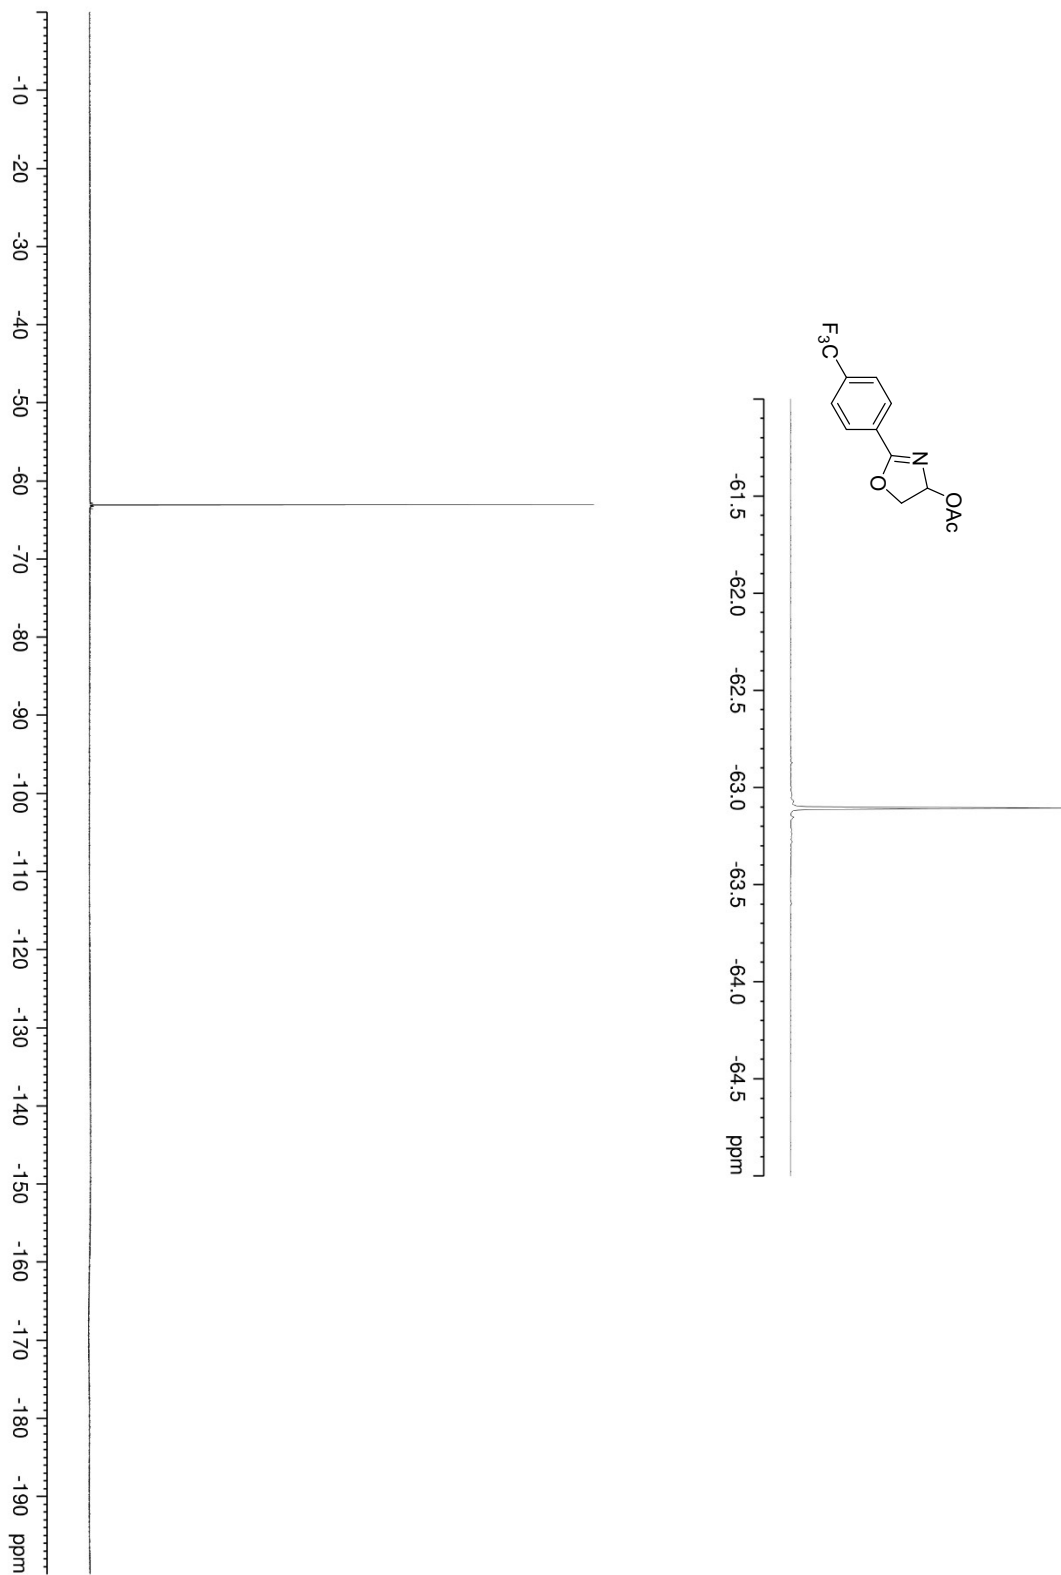

Hong et al.

Figure 65.  $^1\text{H}$  NMR

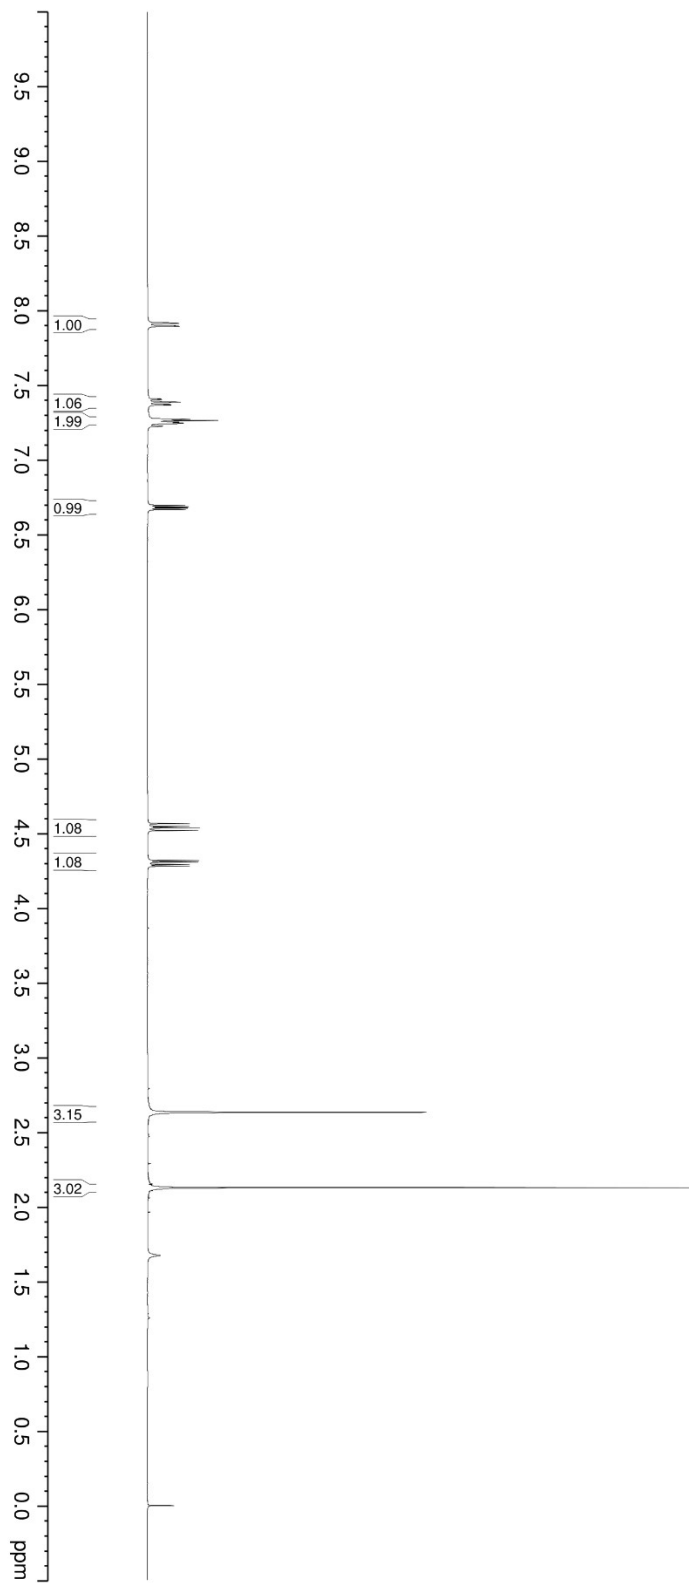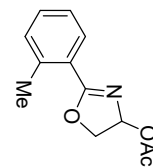

Hong et al.

Figure 66.  $^{13}\text{C}$  NMF

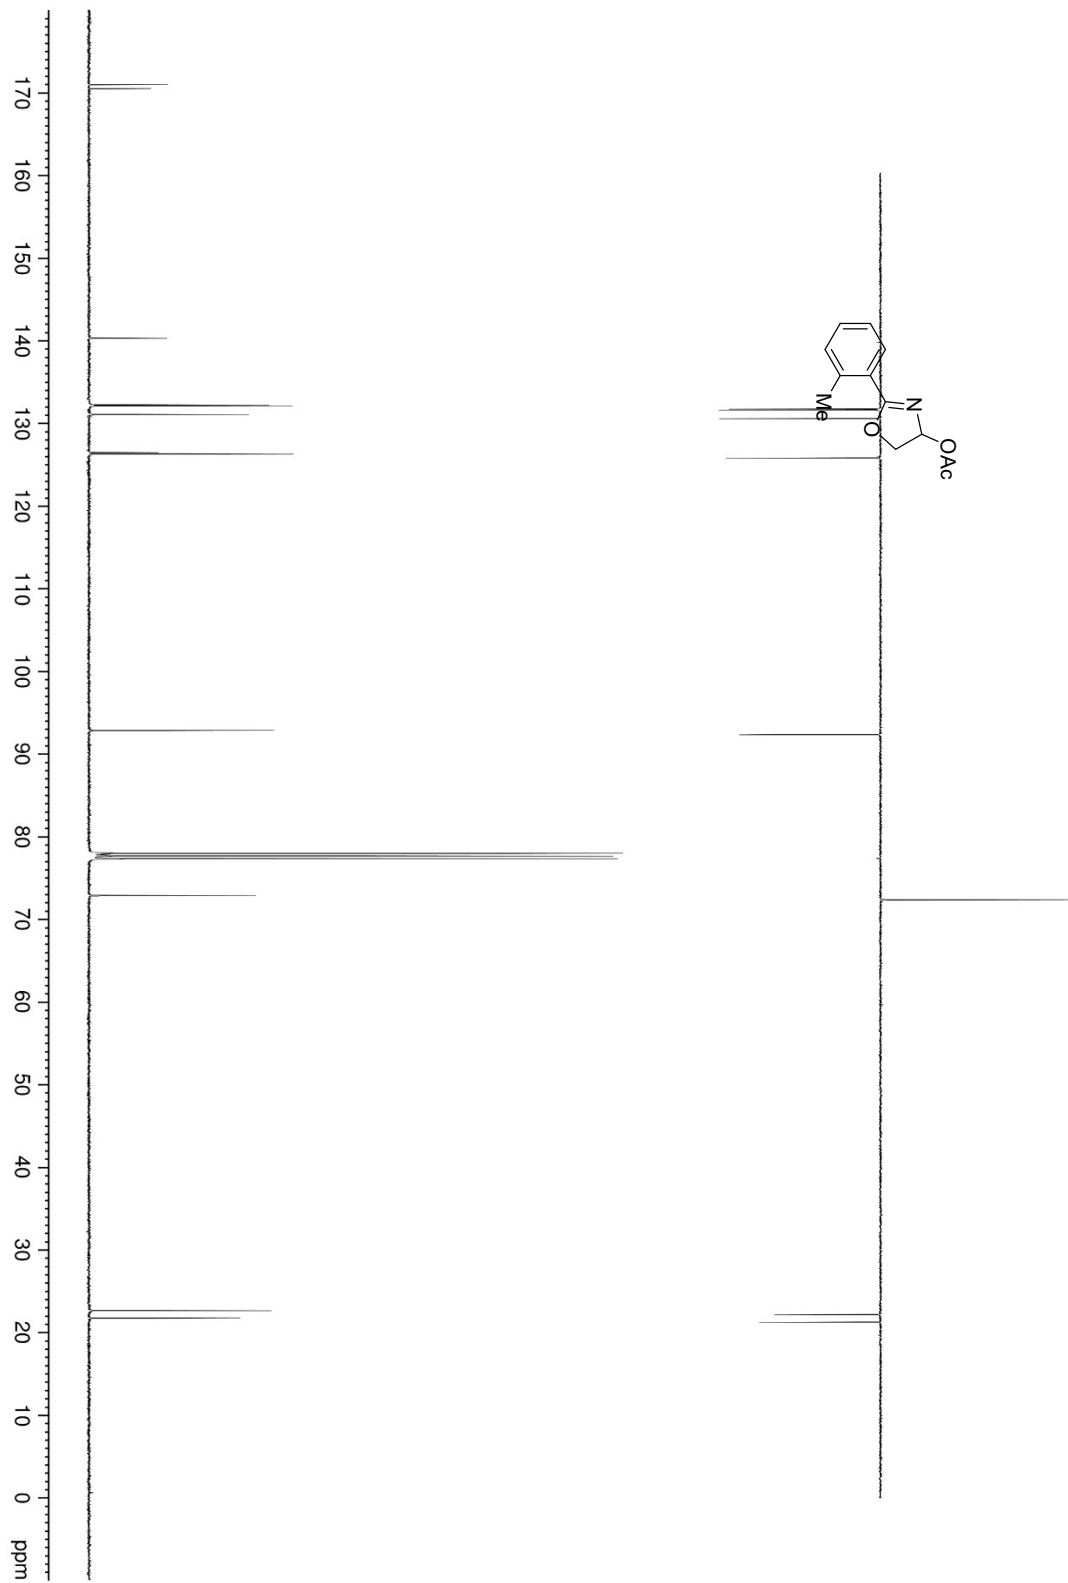

Hong et al.

Figure 67.  $^1\text{H}$  NMR

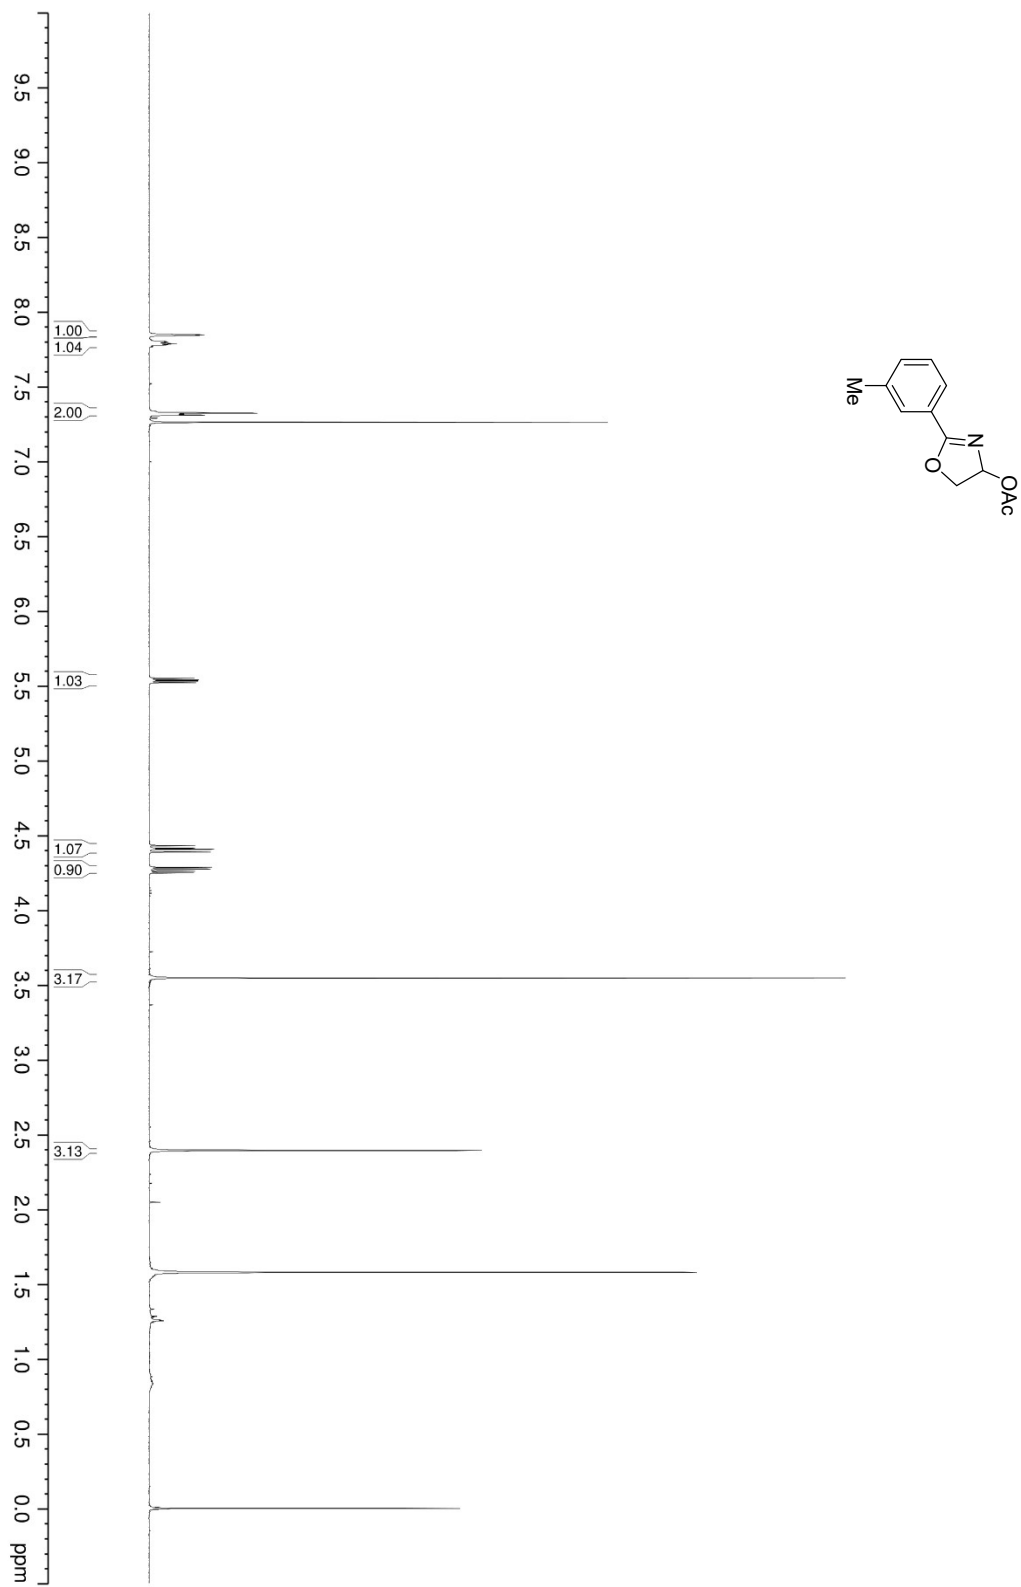

Hong et al.

Figure 68.  $^{13}\text{C}$  NMI

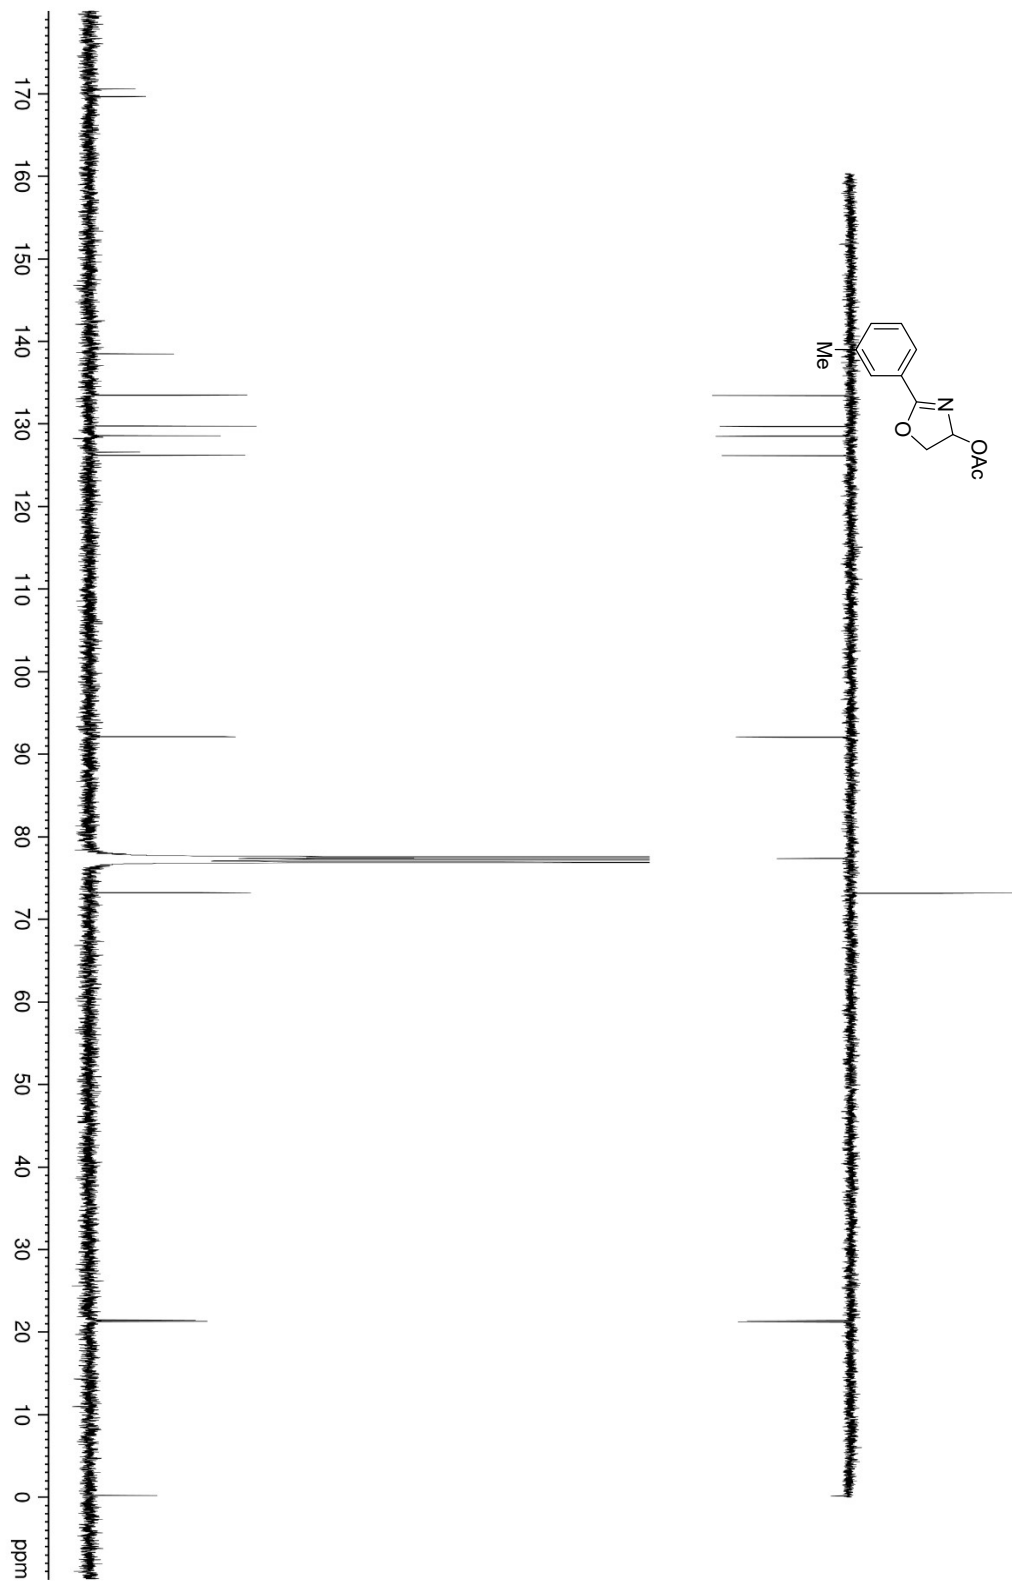

Hong et al.

Figure 69.  $^1\text{H}$  NMR

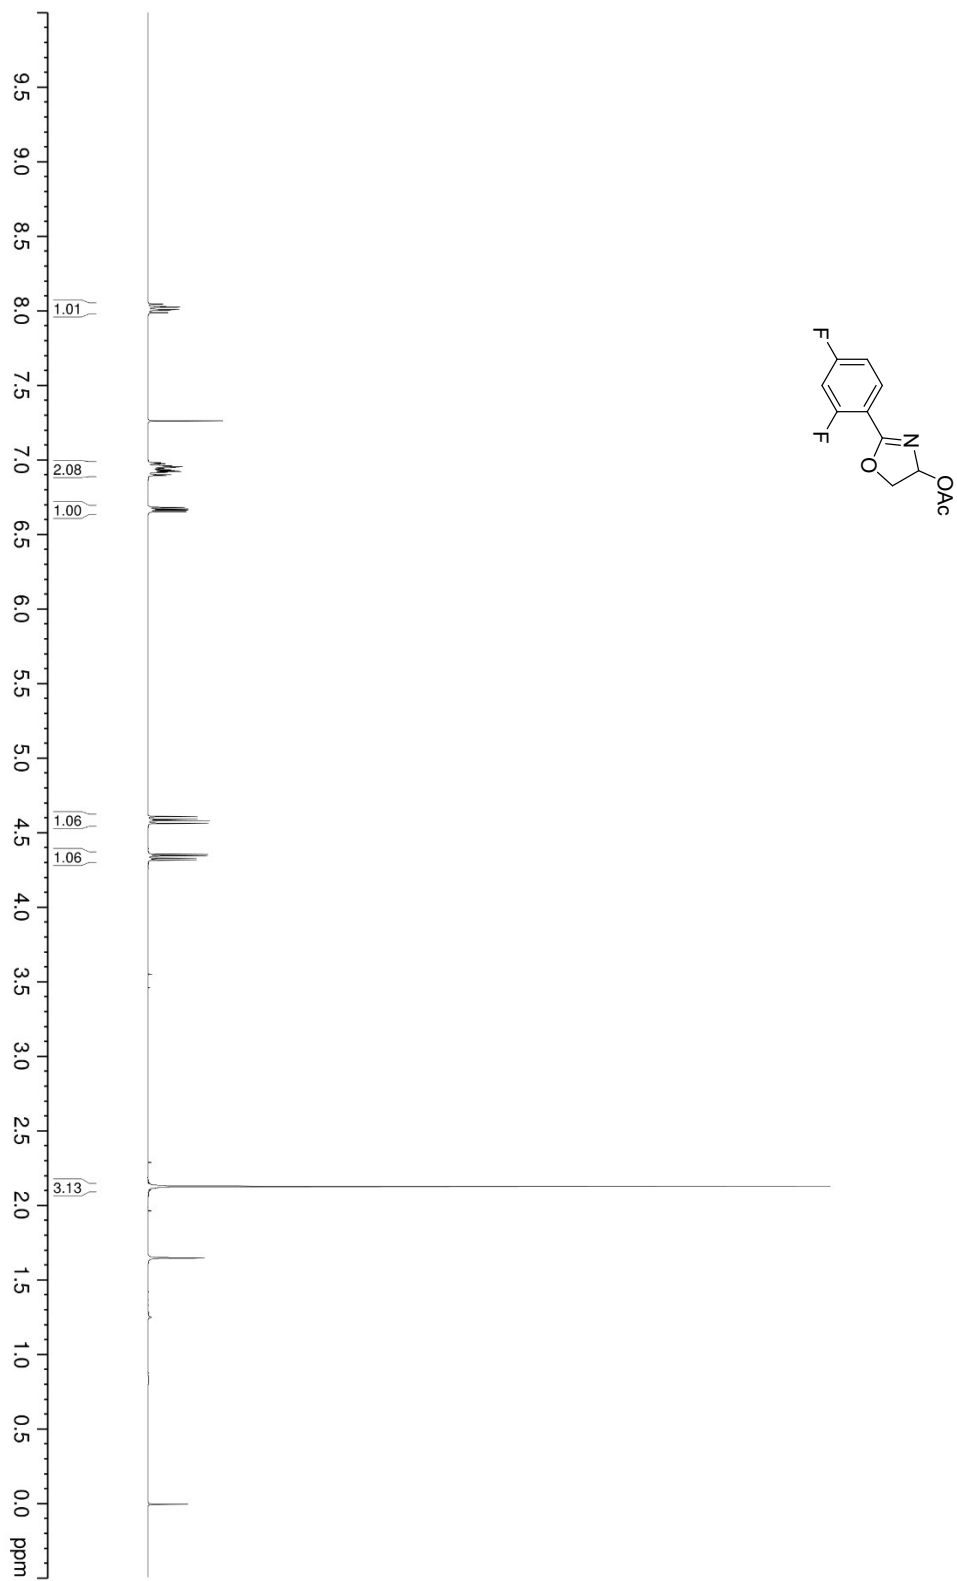

Hong et al.

Figure 70.  $^{13}\text{C}$  NMI

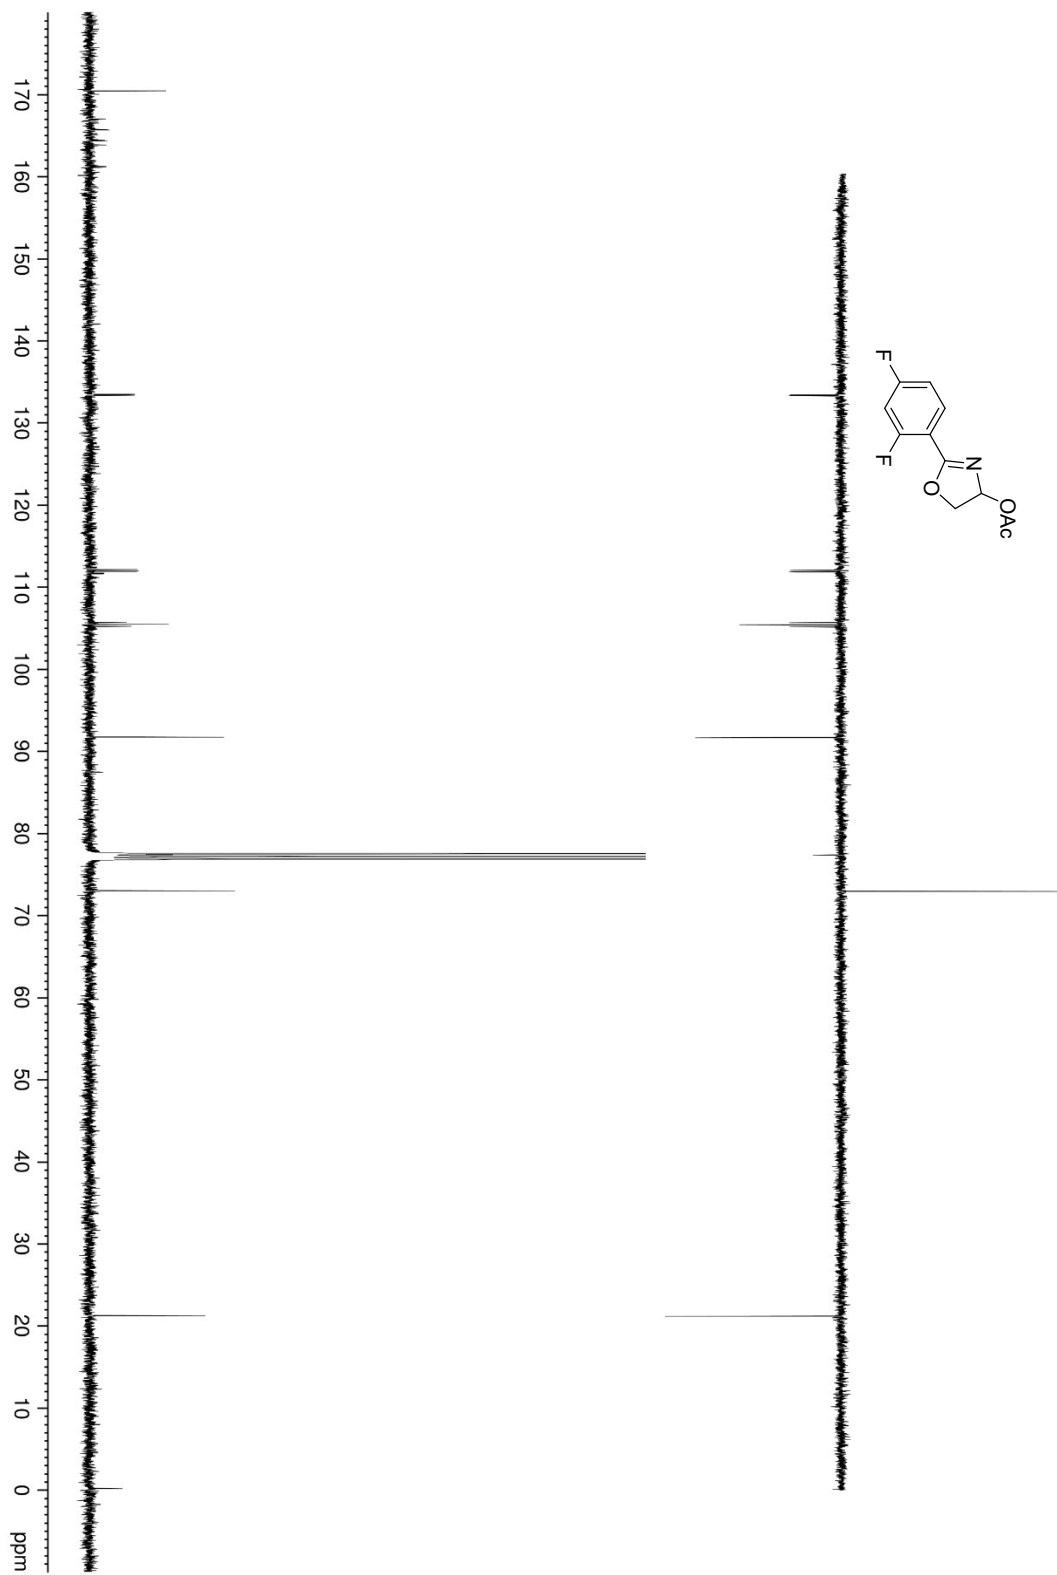

Hong et al.

Figure 71.  $^{19}\text{F}$  NMR

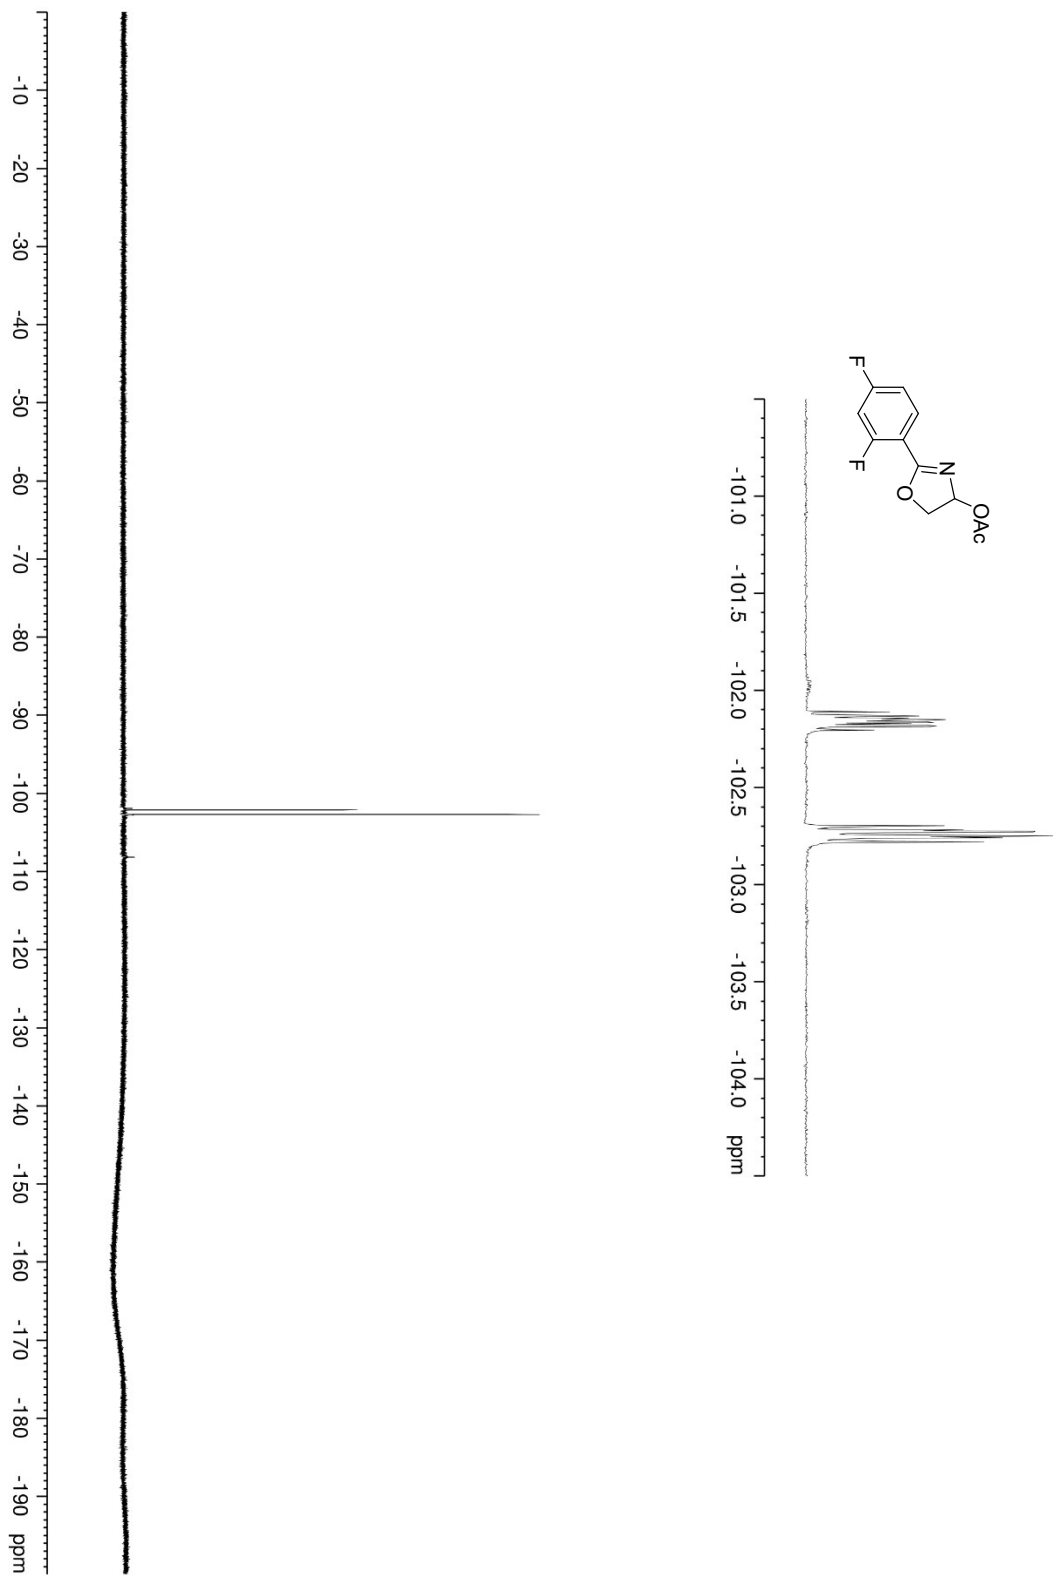

Hong et al.

Figure 72.  $^1\text{H}$  NMR

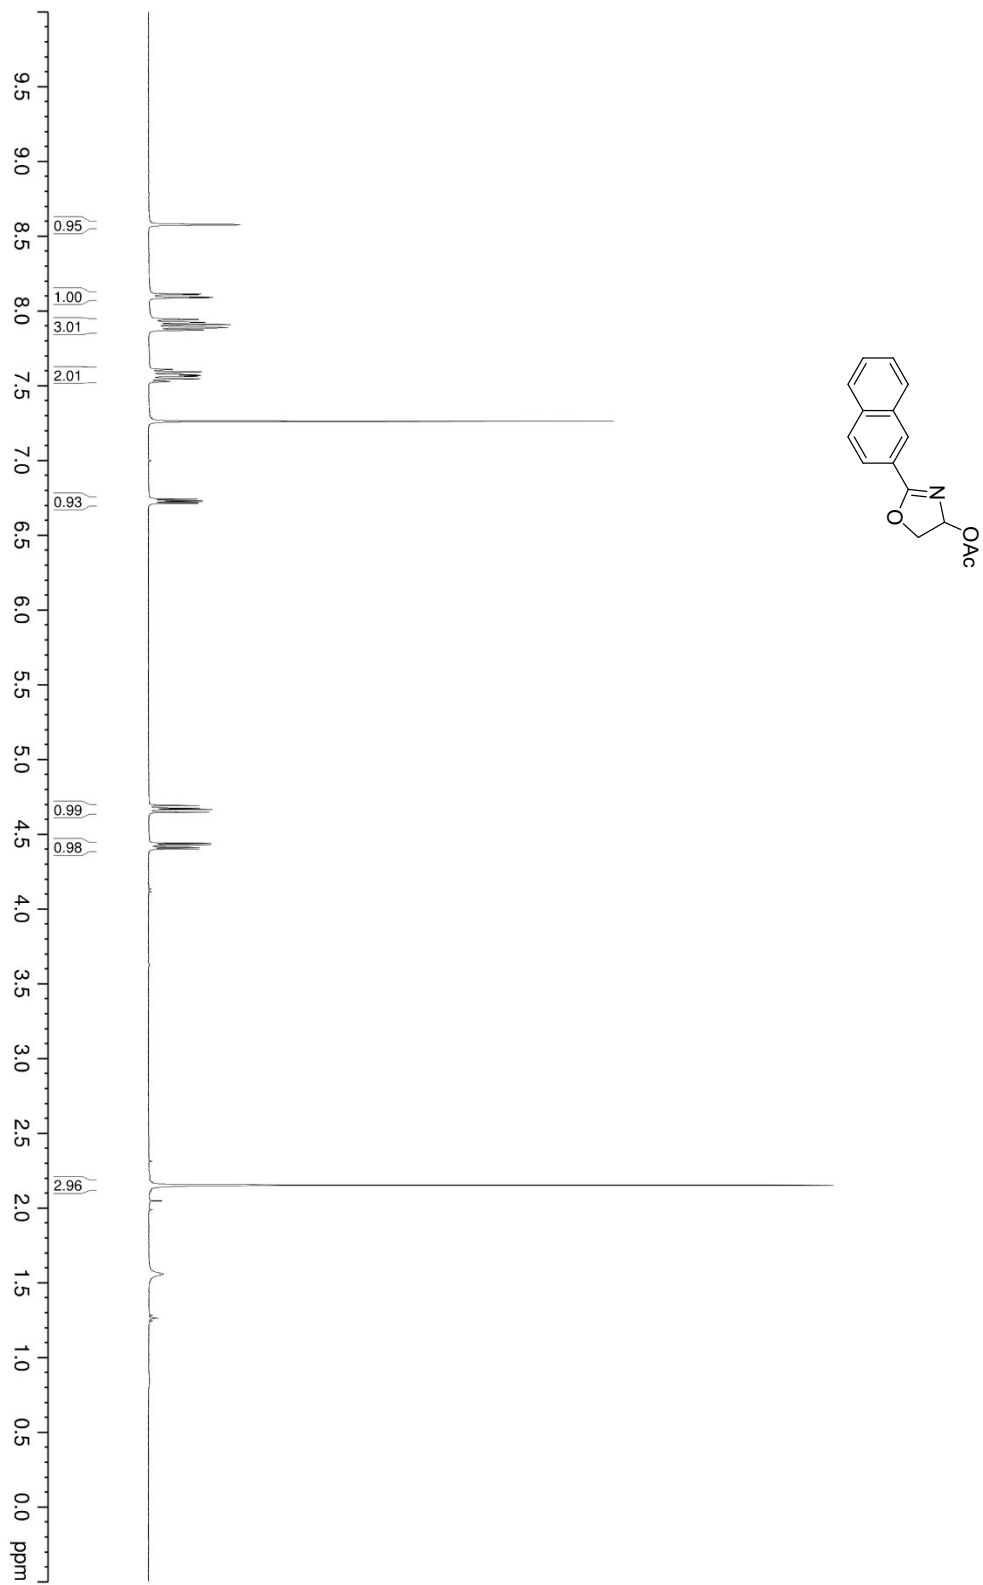

Hong et al.

Figure 73.  $^{13}\text{C}$  NMR

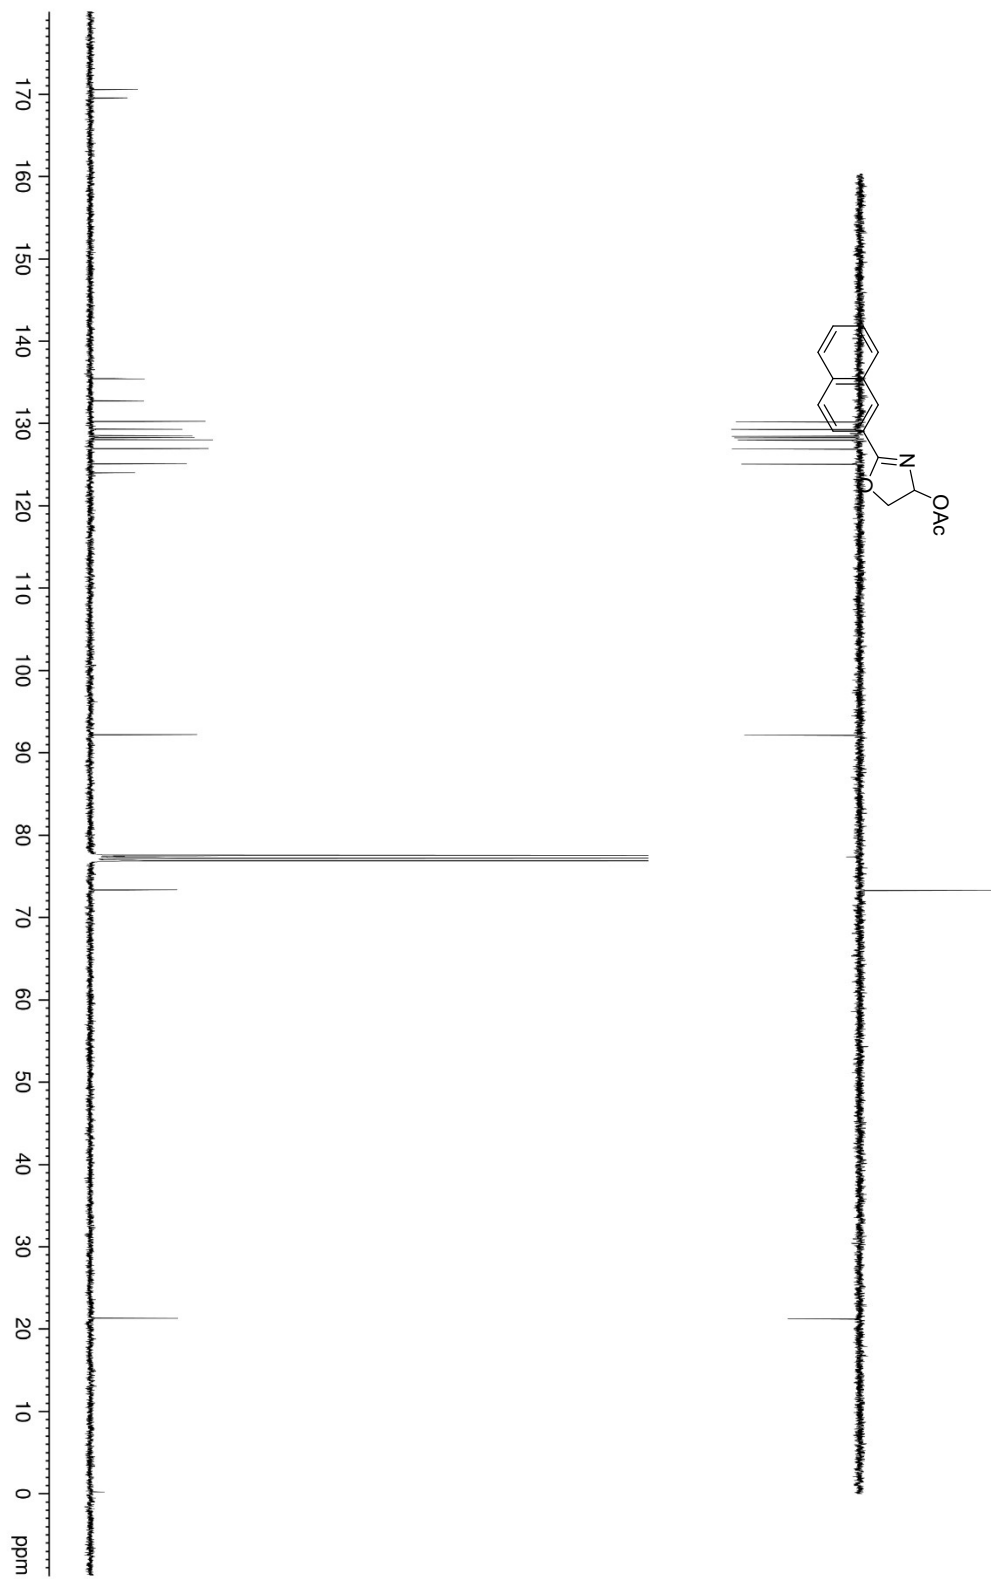

Hong et al.

Figure 74.  $^1\text{H}$  NMR

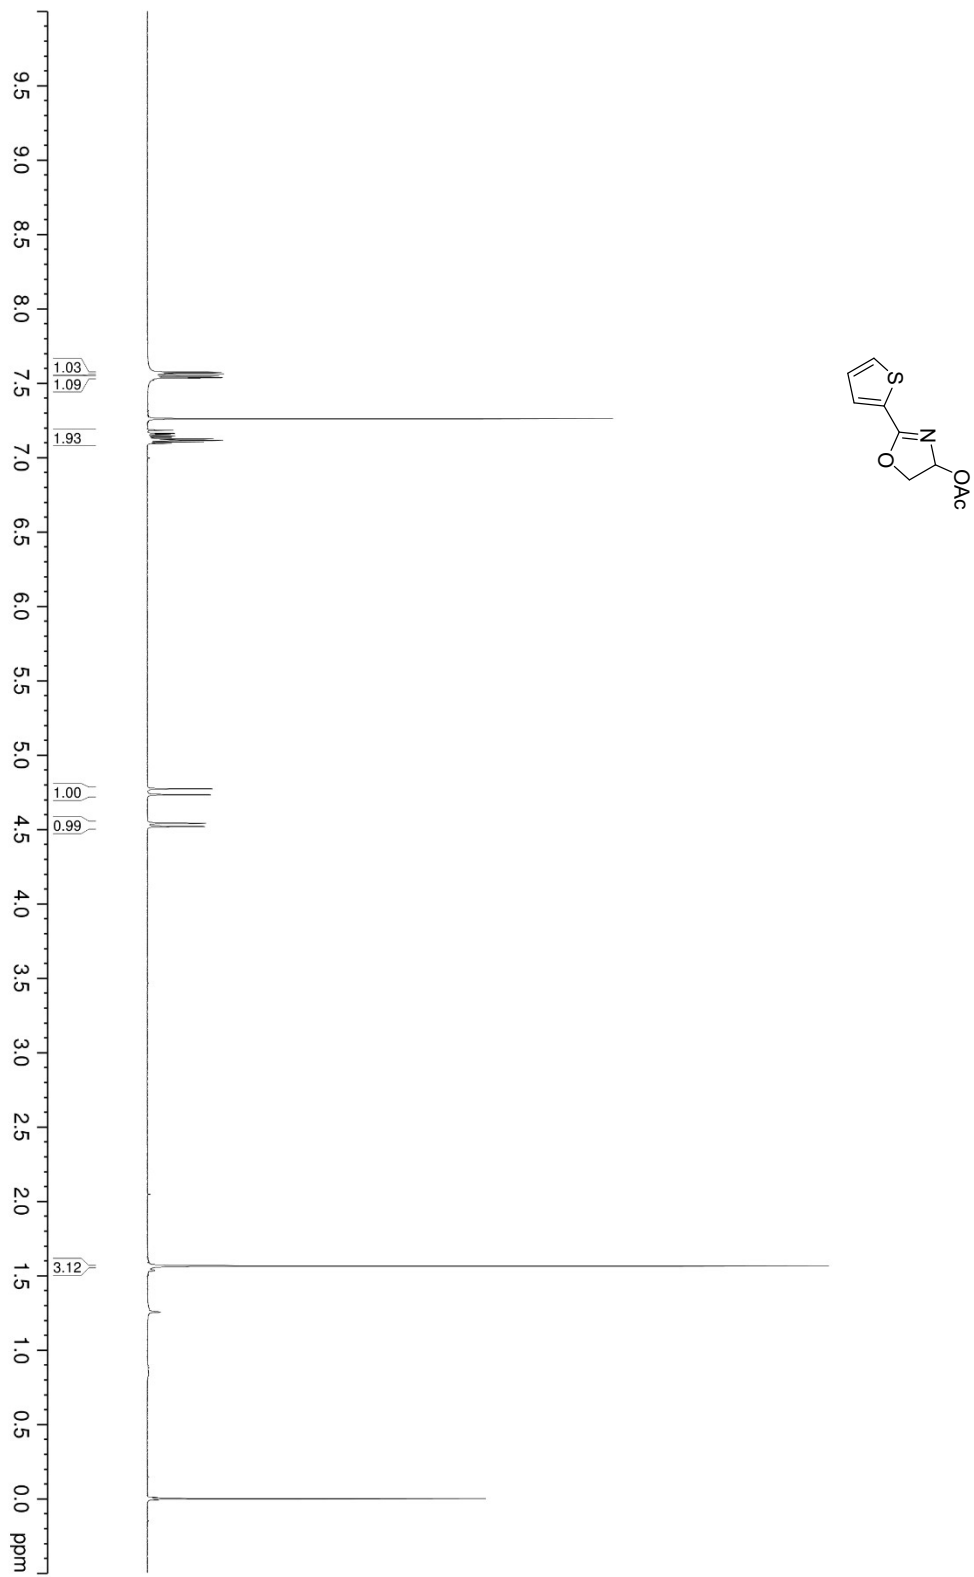

Hong et al.

Figure 75.  $^{13}\text{C}$  NMI

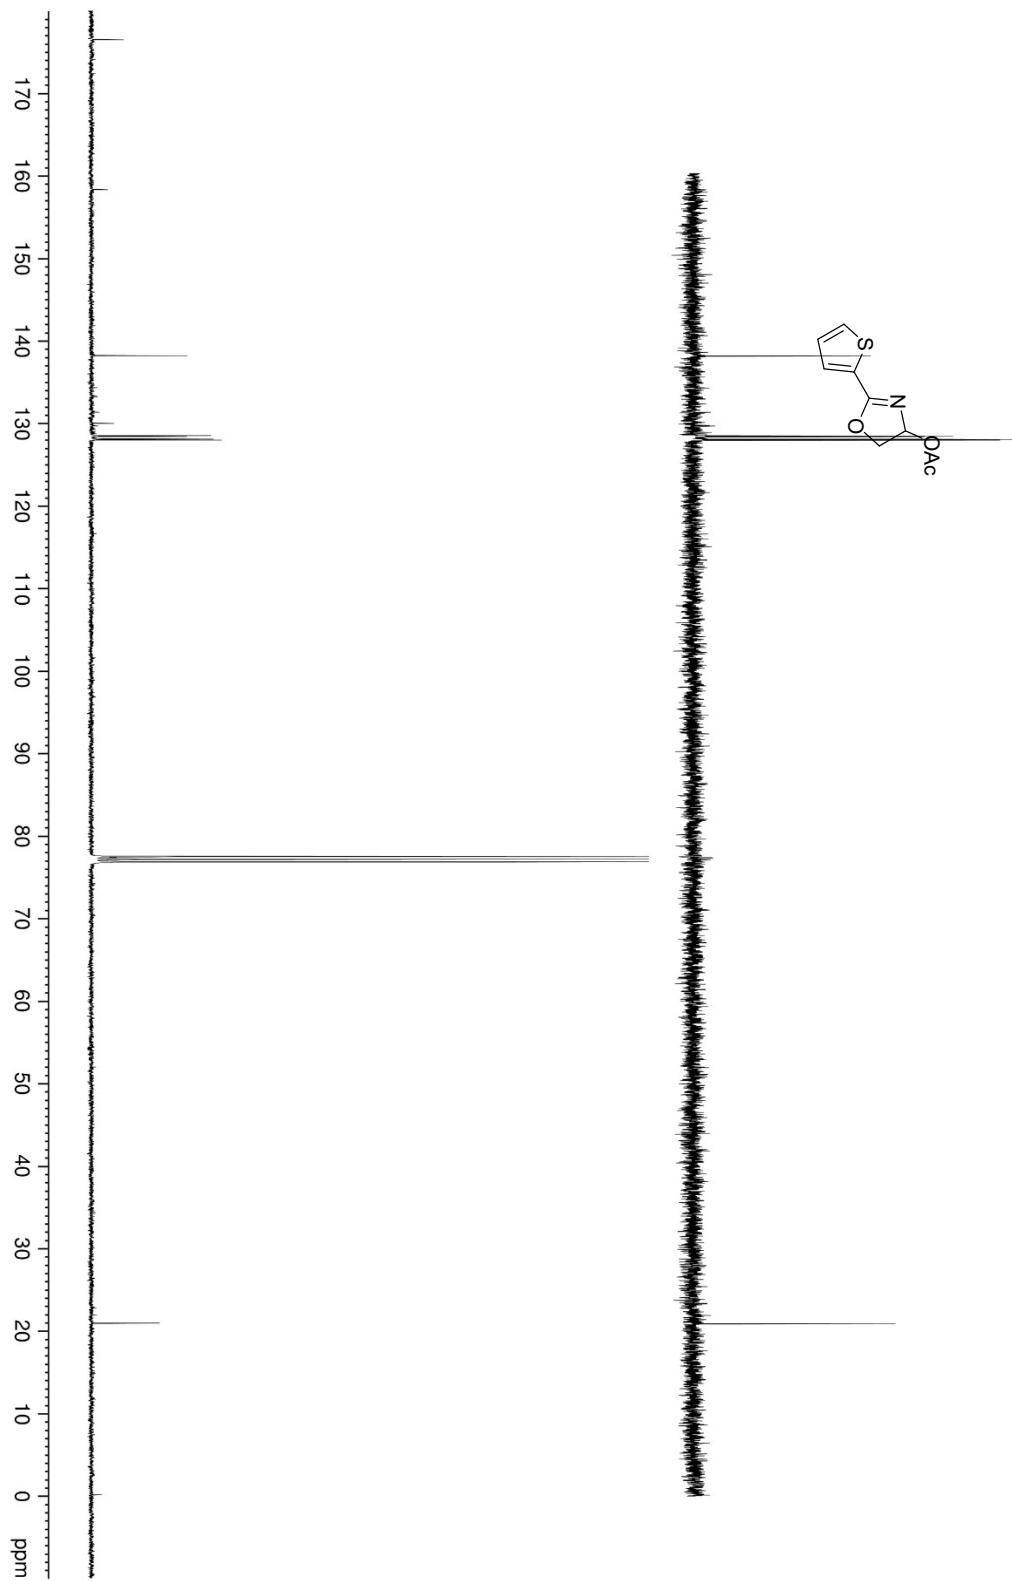

Supplement: d6ob00685j2.pdf [file d6ob00685j2.pdf]
