# Supplementary material
Source: Royal Society of Chemistry journal article supplement (doi:10.1039/d6ob00685j)
Supplement: d6ob00685j1.pdf [file d6ob00685j1.pdf]

## Hypervalent Iodine-Mediated Cyclization of *N*-Vinyl Amides for the Synthesis of 4-Functionalized Dihydrooxazolines

Jiwoo Lee<sup>§,a</sup>, Suhui Kim<sup>§,a</sup>, Chang Sung Hong<sup>§,c</sup>, Bomcha Park<sup>b</sup>, Yeong-Joon Kim<sup>c,\*</sup>, Sungwook Choi<sup>b,\*</sup>,  
and Ki Bum Hong<sup>a,\*</sup>

<sup>a</sup>New Drug Development Center, Daegu-Gyeongbuk Medical Innovation Foundation, Daegu 41061, Korea.  
Email: kbhong@kmedihub.re.kr.

<sup>b</sup>Department of New Drug Discovery and Development, Chungnam National University, Daejeon 34134, Korea; email: swchoi2010@cnu.ac.kr.

<sup>c</sup>Department of Chemistry, Chungnam National University, Daejeon 34134, Korea; email: y2kim@cnu.ac.kr.

### S-I-X

|                                                                                                                   |   |
|-------------------------------------------------------------------------------------------------------------------|---|
| Proposed Reaction Mechanism.....                                                                                  | 3 |
| SI-1 Proposed Reaction Mechanism.....                                                                             | 3 |
| Scheme S1. Proposed Mechanism .....                                                                               | 3 |
| General procedure 1: .....                                                                                        | 3 |
| General procedure 2: .....                                                                                        | 3 |
| General procedure 3: .....                                                                                        | 3 |
| 2-(4-Fluorophenyl)- <i>N</i> -phenyl-4,5-dihydrooxazol-4-amine (3a).....                                          | 3 |
| <i>N</i> -Phenyl-2-( <i>p</i> -tolyl)-4,5-dihydrooxazol-4-amine (3b).....                                         | 4 |
| 2-(4-Bromophenyl)- <i>N</i> -phenyl-4,5-dihydrooxazol-4-amine (3c).....                                           | 4 |
| <i>N</i> -Phenyl-2-(4-(trifluoromethyl)phenyl)-4,5-dihydrooxazol-4-amine (3d).....                                | 4 |
| 4-(4-(Phenylamino)-4,5-dihydrooxazol-2-yl)benzotrile (3e).....                                                    | 4 |
| 2-(2-Fluorophenyl)- <i>N</i> -phenyl-4,5-dihydrooxazol-4-amine (3f).....                                          | 4 |
| 2-(3-Methoxyphenyl)- <i>N</i> -phenyl-4,5-dihydrooxazol-4-amine (3g).....                                         | 5 |
| <i>N</i> -Phenyl-2-( <i>o</i> -tolyl)-4,5-dihydrooxazol-4-amine (3h).....                                         | 5 |
| <i>N</i> -Phenyl-2-( <i>m</i> -tolyl)-4,5-dihydrooxazol-4-amine (3i).....                                         | 5 |
| 2-(2,4-Difluorophenyl)- <i>N</i> -phenyl-4,5-dihydrooxazol-4-amine (3j).....                                      | 5 |
| 2-(3,4-Dimethoxyphenyl)- <i>N</i> -phenyl-4,5-dihydrooxazol-4-amine (3k).....                                     | 6 |
| 2-(Naphthalen-2-yl)- <i>N</i> -phenyl-4,5-dihydrooxazol-4-amine (3l).....                                         | 6 |
| <i>N</i> -Phenyl-2-(thiophen-2-yl)-4,5-dihydrooxazol-4-amine (3m).....                                            | 6 |
| 4-(2,3-Dihydro-1 <i>H</i> -pyrrolo[2,3- <i>b</i> ]pyridin-1-yl)-2-(4-fluorophenyl)-4,5-dihydrooxazole (7a).....   | 6 |
| 2-(4-Bromophenyl)-4-(2,3-dihydro-1 <i>H</i> -pyrrolo[2,3- <i>b</i> ]pyridin-1-yl)-4,5-dihydrooxazole (7c).....    | 7 |
| 2-(4-Cyanophenyl)-4-(2,3-dihydro-1 <i>H</i> -pyrrolo[2,3- <i>b</i> ]pyridin-1-yl)-4,5-dihydrooxazole (7e).....    | 7 |
| 4-(2,3-Dihydro-1 <i>H</i> -pyrrolo[2,3- <i>b</i> ]pyridin-1-yl)-2-( <i>o</i> -tolyl)-4,5-dihydrooxazole (7h)..... | 7 |

|                                                                                                                  |    |
|------------------------------------------------------------------------------------------------------------------|----|
| 4-(2,3-dihydro-1 <i>H</i> -pyrrolo[2,3- <i>b</i> ]pyridin-1-yl)-2-(naphthalen-2-yl)-4,5-dihydrooxazole (7l)..... | 7  |
| 2-(4-Fluorophenyl)- <i>N</i> -(pyridin-4-yl)-4,5-dihydrooxazol-4-amine (8a).....                                 | 8  |
| <i>N</i> -(Pyridin-4-yl)-2-( <i>p</i> -tolyl)-4,5-dihydrooxazol-4-amine (8b).....                                | 8  |
| 2-(naphthalen-2-yl)- <i>N</i> -(pyridin-4-yl)-4,5-dihydrooxazol-4-amine (8l).....                                | 8  |
| 2-(4-Bromophenyl)- <i>N</i> -(pyridin-3-yl)-4,5-dihydrooxazol-4-amine (9c).....                                  | 8  |
| 4-(4-(Pyridin-3-ylamino)-4,5-dihydrooxazol-2-yl)benzotrile (9e).....                                             | 9  |
| 2-(4-Fluorophenyl)-4,5-dihydrooxazol-4-yl acetate (10a).....                                                     | 9  |
| 2-( <i>p</i> -Tolyl)-4,5-dihydrooxazol-4-yl acetate (10b).....                                                   | 9  |
| 2-(4-Bromophenyl)-4,5-dihydrooxazol-4-yl acetate (10c).....                                                      | 9  |
| 2-(4-(Trifluoromethyl)phenyl)-4,5-dihydrooxazol-4-yl acetate (10d).....                                          | 9  |
| 2-( <i>o</i> -Tolyl)-4,5-dihydrooxazol-4-yl acetate (10g).....                                                   | 10 |
| 2-( <i>m</i> -Tolyl)-4,5-dihydrooxazol-4-yl acetate (10i).....                                                   | 10 |
| 2-(2,4-Difluorophenyl)-4,5-dihydrooxazol-4-yl acetate (10j).....                                                 | 10 |
| 2-(Naphthalen-2-yl)-4,5-dihydrooxazol-4-yl acetate (10l).....                                                    | 10 |
| 2-(Thiophen-2-yl)-4,5-dihydrooxazol-4-yl acetate (10m).....                                                      | 10 |

## SI-1 Proposed Reaction Mechanism

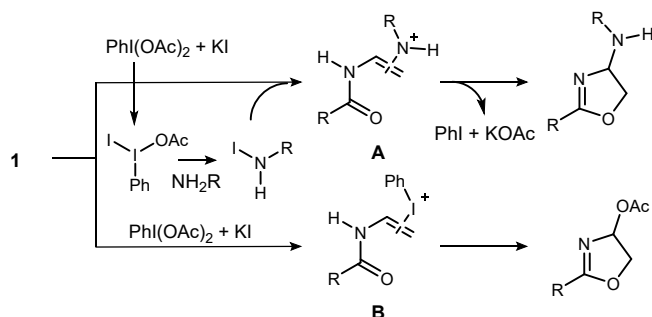

Scheme S1. Proposed Mechanism

PhI(OAc)<sub>2</sub> and KI undergo ligand metathesis to generate the unsymmetrical iodine(III) species PhI(OAc)(I) as the active electrophilic intermediate. This species engages the substrate through two divergent pathways. When an amine is present, PhI(OAc)(I) oxidizes the nitrogen center of the substrate to afford an N–I intermediate, which upon addition to the alkene forms an aziridinium ion, ultimately delivering the aminoxygenation adduct. Without amine species, PhI(OAc)(I) activates the alkene directly through formation of a bridged iodonium ion intermediate, with concomitant release of PhI and acetate. Nucleophilic attack by the acetoxy group on the iodonium ion delivers the acetoxyiodination adduct.

**General procedure 1:** The mixture of vinylbenzamide (0.300 mmol) in acetonitrile (1.5 mL) was added PhI(OAc)<sub>2</sub> (0.360 mmol), KI (0.360 mmol), and amine (0.360 mmol) at room temperature. The reaction mixture was stirred at 50 °C for 18 h. The mixture was concentrated and purified by column chromatography on silica gel to afford the 4-substituted dihydrooxazoline.

**General procedure 2:** The mixture of vinylbenzamide (0.600 mmol) in acetonitrile (1.8 mL) was added PhI(OAc)<sub>2</sub> (0.360 mmol), KI (0.360 mmol), and amine (0.360 mmol) at room temperature. The reaction mixture was stirred at 50 °C for 18 h. The mixture was concentrated and purified by column chromatography on silica gel to afford the 4-substituted dihydrooxazoline.

**General procedure 3:** The mixture of vinylbenzamide (0.300 mmol) in acetonitrile (1.5 mL) was added PhI(OAc)<sub>2</sub> (0.360 mmol), KI (0.360 mmol) at room temperature. The reaction mixture was stirred at 50 °C for 18 h. The mixture was concentrated and purified by column chromatography on silica gel to afford the 4-substituted dihydrooxazoline.

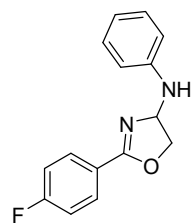

**2-(4-Fluorophenyl)-N-phenyl-4,5-dihydrooxazol-4-amine (3a).** Prepared according to the general procedure 1 using 4-fluoro-*N*-vinylbenzamide (49.6 mg, 0.300 mmol) over 18 hours. Flash column chromatography (SiO<sub>2</sub>, 0-30% ethyl acetate in hexanes) yielded a solid (52.1 mg, 68%). *R<sub>f</sub>* = 0.32 (70% EtOAc/hexanes); <sup>1</sup>H NMR (400 MHz, CDCl<sub>3</sub>) δ 8.06 – 8.00 (m, 2H), 7.22 (dd, *J* = 8.5, 7.4 Hz, 2H), 7.10 (dd, *J* = 9.0, 8.4 Hz, 2H), 6.81 (tt, *J* = 7.4, 1.1 Hz, 1H), 6.77 (dd, *J* = 8.6, 1.1 Hz, 2H), 5.86 (dd, *J* = 8.4, 6.2 Hz, 1H), 4.71 (dd, *J* = 9.5, 8.4 Hz, 1H), 4.30 (dd, *J* = 9.5, 6.2 Hz, 1H), the NH was not observed; <sup>13</sup>C NMR (101 MHz, CDCl<sub>3</sub>) δ 165.21 (t, *J*<sub>C-F</sub> = 127.4 Hz), 145.72, 131.16, 131.07, 129.57 (2C), 123.61, 123.58, 119.19, 115.84, 115.62, 114.36 (2C), 77.11, 73.49; HRMS (ESI): Exact mass calcd for C<sub>15</sub>H<sub>13</sub>FN<sub>2</sub>O [M+H]<sup>+</sup> 257.1085, found 257.1084.

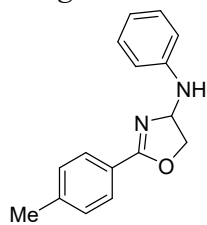

**N-Phenyl-2-(*p*-tolyl)-4,5-dihydrooxazol-4-amine (3b).** Prepared according to the general procedure 1 using 4-methyl-*N*-vinylbenzamide (48.4 mg, 0.300 mmol) over 18 hours. Flash column chromatography (SiO<sub>2</sub>, 0-30% ethyl acetate in hexanes) yielded a solid (36.7 mg, 46%). *R<sub>f</sub>* = 0.30 (70% EtOAc/hexanes); <sup>1</sup>H NMR (400 MHz, CDCl<sub>3</sub>) δ 7.88 (d, *J* = 8.2 Hz, 2H), 7.25 – 7.19 (m, 4H), 6.80 (tt, *J* = 7.4, 1.1 Hz, 1H), 6.74 (dd, *J* = 8.6, 1.1 Hz, 2H), 5.81 (q, *J* = 7.3 Hz, 1H), 4.65 (dd, *J* = 9.3, 8.3 Hz, 1H), 4.19 (dd, *J* = 9.3, 6.0 Hz, 1H), 4.09 (d, *J* = 7.3 Hz, 1H), 2.40 (s, 3H); <sup>13</sup>C NMR (101 MHz, CDCl<sub>3</sub>) δ 166.30, 145.81, 142.64, 129.54 (2C), 129.28 (2C), 128.76 (2C), 124.44, 119.02, 114.30 (2C), 76.95, 73.34, 21.78.; HRMS (ESI): Exact mass calcd for C<sub>16</sub>H<sub>16</sub>N<sub>2</sub>O [M+H]<sup>+</sup> 253.1335, found 253.1333.

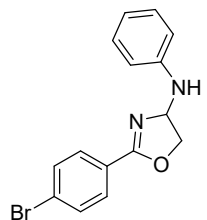

**2-(4-Bromophenyl)-*N*-phenyl-4,5-dihydrooxazol-4-amine (3c).** Prepared according to the general procedure 1 using 4-bromo-*N*-vinylbenzamide (67.8 mg, 0.300 mmol) over 18 hours. Flash column chromatography (SiO<sub>2</sub>, 0-30% ethyl acetate in hexanes) yielded a solid (52.5 mg, 55%). *R<sub>f</sub>* = 0.27 (70% EtOAc/hexanes); <sup>1</sup>H NMR (400 MHz, CDCl<sub>3</sub>) δ 7.85 (dt, *J* = 8.7, 2.2 Hz, 2H), 7.56 (dt, *J* = 8.7, 2.0 Hz, 2H), 7.25 – 7.18 (m, 2H), 6.82 (tt, *J* = 7.4, 1.1 Hz, 1H), 6.80 – 6.72 (m, 2H), 5.83 (dd, *J* = 8.4, 6.3 Hz, 1H), 4.67 (dd, *J* = 9.4, 8.4 Hz, 1H), 4.20 (dd, *J* = 9.4, 6.3 Hz, 1H), 4.10 (s, 1H); <sup>13</sup>C NMR (101 MHz, CDCl<sub>3</sub>) δ 165.26, 145.68, 131.84 (2C), 130.26 (2C), 129.57 (2C), 126.84, 126.35, 119.23, 114.35 (2C), 77.36, 73.42; HRMS (ESI): Exact mass calcd for C<sub>15</sub>H<sub>13</sub>BrN<sub>2</sub>O [M+H]<sup>+</sup> 317.0284, found 317.0283.

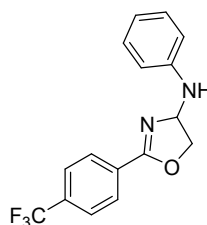

***N*-Phenyl-2-(4-(trifluoromethyl)phenyl)-4,5-dihydrooxazol-4-amine (3d).** Prepared according to the general procedure 1 using 4-(trifluoromethyl)-*N*-vinylbenzamide (64.6 mg, 0.300 mmol) over 18 hours. Flash column chromatography (SiO<sub>2</sub>, 0-30% ethyl acetate in hexanes) yielded a solid (38.2 mg, 42%). *R<sub>f</sub>* = 0.29 (70% EtOAc/hexanes); <sup>1</sup>H NMR (400 MHz, CDCl<sub>3</sub>) δ 8.11 (dt, *J* = 8.0, 0.8 Hz, 2H), 7.68 (dt, *J* = 7.5, 0.8 Hz, 2H), 7.26 – 7.22 (m, 2H), 6.83 (dt, *J* = 7.3, 1.1 Hz, 1H), 6.80 – 6.75 (m, 2H), 5.88 (q, *J* = 7.6 Hz, 1H), 4.72 (dd, *J* = 9.5, 8.5 Hz, 1H), 4.23 (dd, *J* = 9.4, 6.4 Hz, 1H), 4.10 (d, *J* = 8.0 Hz, 1H), 1.57 (s, 3H); <sup>13</sup>C NMR (101 MHz, CDCl<sub>3</sub>) δ 164.72, 145.64, 133.72, 133.39, 130.85 (2C), 129.60 (2C), 129.12, 125.51 (q, *J*<sub>C-F</sub> = 3.8 Hz), 119.34 (2C), 114.38 (2C), 77.24, 73.45; HRMS (ESI): Exact mass calcd for C<sub>16</sub>H<sub>13</sub>F<sub>3</sub>N<sub>2</sub>O [M+H]<sup>+</sup> 307.1053, found 307.1051.

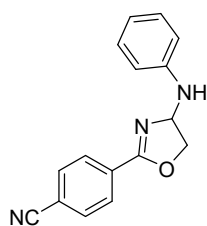

**4-(4-(Phenylamino)-4,5-dihydrooxazol-2-yl)benzotrile (3e).** Prepared according to the general procedure 1 using 4-cyano-*N*-vinylbenzamide (51.7 mg, 0.300 mmol) over 18 hours. Flash column chromatography (SiO<sub>2</sub>, 0-30% ethyl acetate in hexanes) yielded a solid (43.4 mg, 55%). *R<sub>f</sub>* = 0.36 (70% EtOAc/hexanes); <sup>1</sup>H NMR (400 MHz, CDCl<sub>3</sub>) δ 8.10 (d, *J* = 8.7 Hz, 2H), 7.71 (d, *J* = 8.7 Hz, 2H), 7.26 – 7.20 (m, 2H), 6.84 (tt, *J* = 7.3, 1.1 Hz, 1H), 6.78 (dt, *J* = 7.8, 1.1 Hz, 2H), 5.88 (td, *J* = 8.4, 6.5 Hz, 1H), 4.72 (dd, *J* = 9.5, 8.6 Hz, 1H), 4.23 (dd, *J* = 9.5, 6.5 Hz, 1H), 4.08 (d, *J* = 8.3 Hz, 1H); <sup>13</sup>C NMR (101 MHz, CDCl<sub>3</sub>) δ 164.23, 145.57, 132.29 (2C), 131.65, 129.60 (2C), 129.25 (2C), 119.42, 118.29, 115.37, 114.39 (2C), 77.27, 73.48; HRMS (ESI): Exact mass calcd for C<sub>16</sub>H<sub>13</sub>N<sub>3</sub>O [M+H]<sup>+</sup> 264.1131, found 264.1129.

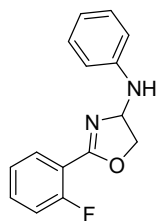

**2-(2-Fluorophenyl)-*N*-phenyl-4,5-dihydrooxazol-4-amine (3f).** Prepared according to the general procedure 1 using 2-fluoro-*N*-vinylbenzamide (49.6 mg, 0.300 mmol) over 18 hours. Flash column chromatography (SiO<sub>2</sub>, 0-30% ethyl acetate in hexanes) yielded a solid (29.7 mg, 37%). *R<sub>f</sub>* = 0.34 (70% EtOAc/hexanes); <sup>1</sup>H NMR (400 MHz, CDCl<sub>3</sub>) δ 7.98 (td, *J* = 7.5, 1.8 Hz, 1H), 7.50 (dddd, *J* = 8.9, 7.2, 4.9, 1.8 Hz, 1H), 7.26 – 7.11 (m, 4H), 6.83 (t, *J* = 7.4 Hz, 1H), 6.79

(d,  $J = 7.7$  Hz, 2H), 5.87 (t,  $J = 7.3$  Hz, 1H), 4.69 (t,  $J = 9.0$  Hz, 1H), 4.32 (t,  $J = 8.0$  Hz, 1H), the NH was not observed;  $^{13}\text{C}$  NMR (101 MHz,  $\text{CDCl}_3$ )  $\delta$  163.18, 162.72, 160.15, 145.77, 133.60, 131.59, 131.57, 129.55 (2C), 124.17, 119.10, 116.89, 115.80, 114.27 (2C), 77.36, 73.14; HRMS (ESI): Exact mass calcd for  $\text{C}_{15}\text{H}_{13}\text{FN}_2\text{O}$   $[\text{M}+\text{H}]^+$  257.1085, found 257.1083.

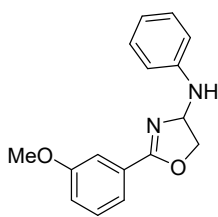

**2-(3-Methoxyphenyl)-N-phenyl-4,5-dihydrooxazol-4-amine (3g).** Prepared according to the general procedure 1 using 3-methoxy-*N*-vinylbenzamide (53.2 mg, 0.300 mmol) over 18 hours. Flash column chromatography ( $\text{SiO}_2$ , 0-30% ethyl acetate in hexanes) yielded a solid (41.3 mg, 51%).  $R_f = 0.30$  (70% EtOAc/hexanes);  $^1\text{H}$  NMR (400 MHz,  $\text{CDCl}_3$ )  $\delta$  7.57 (dt,  $J = 7.7, 1.3$  Hz, 1H), 7.52 (dd,  $J = 2.7, 1.5$  Hz, 1H), 7.33 (t,  $J = 7.9$  Hz, 1H), 7.27 – 7.19 (m, 2H), 7.05 (ddd,  $J = 8.3, 2.7, 1.0$  Hz, 1H), 6.81 (tt,  $J = 7.3, 1.1$  Hz, 1H), 6.75 (dd,  $J = 8.6, 1.1$  Hz, 2H), 5.83 (d,  $J = 7.3$  Hz, 1H), 4.67 (dd,  $J = 9.3, 8.4$  Hz, 1H), 4.21 (dd,  $J = 9.3, 6.1$  Hz, 1H), 4.11 (s, 1H), 3.84 (s, 3H);  $^{13}\text{C}$  NMR (101 MHz,  $\text{CDCl}_3$ )  $\delta$  166.12, 159.66, 145.76, 129.62, 129.55 (2C), 128.52, 121.24, 119.11, 118.94, 114.34 (2C), 113.07, 77.04, 73.43, 55.61; HRMS (ESI): Exact mass calcd for  $\text{C}_{16}\text{H}_{16}\text{N}_2\text{O}_2$   $[\text{M}+\text{H}]^+$  269.1285, found 269.1283.

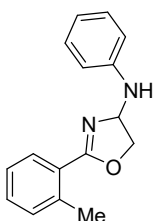

**N-Phenyl-2-(*o*-tolyl)-4,5-dihydrooxazol-4-amine (3h).** Prepared according to the general procedure 1 using 2-methyl-*N*-vinylbenzamide (48.4 mg, 0.300 mmol) over 18 hours. Flash column chromatography ( $\text{SiO}_2$ , 0-30% ethyl acetate in hexanes) yielded a solid (38.4 mg, 51%).  $R_f = 0.32$  (70% EtOAc/hexanes);  $^1\text{H}$  NMR (400 MHz,  $\text{CDCl}_3$ )  $\delta$  7.84 (dd,  $J = 7.9, 1.5$  Hz, 1H), 7.36 (td,  $J = 7.7, 1.5$  Hz, 1H), 7.28 – 7.18 (m, 4H), 6.81 (tt,  $J = 7.3, 1.1$  Hz, 1H), 6.76 (dt,  $J = 7.7, 1.1$  Hz, 2H), 5.83 (dd,  $J = 14.4, 7.3$  Hz, 1H), 4.62 (dd,  $J = 9.3, 8.4$  Hz, 1H), 4.18 (dd,  $J = 9.3, 6.1$  Hz, 1H), 4.12 (d,  $J = 7.2$  Hz, 1H), 2.60 (s, 3H);  $^{13}\text{C}$  NMR (101 MHz,  $\text{CDCl}_3$ )  $\delta$  166.58, 145.94, 139.34, 131.47, 131.14, 130.20, 129.51 (2C), 126.81, 125.75, 119.00, 114.35 (2C), 77.57, 72.61, 22.00; HRMS (ESI): Exact mass calcd for  $\text{C}_{16}\text{H}_{16}\text{N}_2\text{O}$   $[\text{M}+\text{H}]^+$  253.1335, found 253.1334.

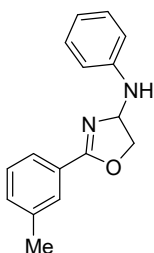

**N-Phenyl-2-(*m*-tolyl)-4,5-dihydrooxazol-4-amine (3i).** Prepared according to the general procedure 1 using 3-methyl-*N*-vinylbenzamide (48.4 mg, 0.300 mmol) over 18 hours. Flash column chromatography ( $\text{SiO}_2$ , 0-30% ethyl acetate in hexanes) yielded a solid (43.9 mg, 58%).  $R_f = 0.28$  (70% EtOAc/hexanes);  $^1\text{H}$  NMR (400 MHz,  $\text{CDCl}_3$ )  $\delta$  7.83 (td,  $J = 1.4, 0.7$  Hz, 1H), 7.77 (tdd,  $J = 4.1, 2.0, 0.6$  Hz, 1H), 7.34 – 7.28 (m, 2H), 7.27 – 7.18 (m, 2H), 6.81 (tt,  $J = 7.3, 1.1$  Hz, 1H), 6.75 (dd,  $J = 8.7, 1.1$  Hz, 2H), 5.83 (td,  $J = 8.0, 6.1$  Hz, 1H), 4.66 (dd,  $J = 9.3, 8.4$  Hz, 1H), 4.21 (dd,  $J = 9.3, 6.1$  Hz, 1H), 4.10 (d,  $J = 7.4$  Hz, 1H), 2.38 (s, 3H);  $^{13}\text{C}$  NMR (101 MHz,  $\text{CDCl}_3$ )  $\delta$  166.30, 145.83, 138.33, 132.86, 129.55 (2C), 129.33, 128.45, 127.22, 125.83, 119.04, 114.28 (2C), 77.03, 73.34, 21.38; HRMS (ESI): Exact mass calcd for  $\text{C}_{16}\text{H}_{16}\text{N}_2\text{O}$   $[\text{M}+\text{H}]^+$  253.1335, found 253.1334.

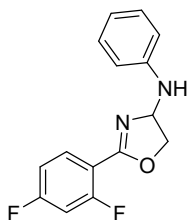

**2-(2,4-Difluorophenyl)-N-phenyl-4,5-dihydrooxazol-4-amine (3j).** Prepared according to the general procedure 1 using 2,4-difluoro-*N*-vinylbenzamide (54.9 mg, 0.300 mmol) over 18 hours. Flash column chromatography ( $\text{SiO}_2$ , 0-30% ethyl acetate in hexanes) yielded a solid (40.0 mg, 49%).  $R_f = 0.26$  (70% EtOAc/hexanes);  $^1\text{H}$  NMR (400 MHz,  $\text{CDCl}_3$ )  $\delta$  7.96 (tdd,  $J = 8.7, 6.3, 1.8$  Hz, 1H), 7.25 – 7.20 (m, 2H), 6.91 (dtd,  $J = 11.2, 8.5, 3.8$  Hz, 2H), 6.81 (tt,  $J = 7.3, 1.2$  Hz, 1H), 6.74 (ddd,  $J = 8.6, 2.3, 1.2$  Hz, 2H), 5.83 (q,  $J = 7.0, 6.5$  Hz, 1H), 4.66 (td,  $J = 9.2, 1.9$  Hz, 1H), 4.21 (ddd,  $J = 8.2, 6.1, 1.9$  Hz, 1H), 4.12 (d,  $J = 7.4$  Hz, 1H);  $^{13}\text{C}$  NMR (101 MHz,  $\text{CDCl}_3$ )  $\delta$  165.38, 163.66 (d,  $J_{\text{C-F}} = 61.1$  Hz), 162.36 (d,  $J_{\text{C-F}} = 5.6$  Hz), 145.70, 133.06 (dd,  $J_{\text{C-F}} = 10.3, 3.2$  Hz), 129.57 (2C), 119.18, 114.27 (2C), 112.29, 111.83 (dd,  $J_{\text{C-F}} = 21.6, 3.8$  Hz), 105.26 (t,  $J_{\text{C-F}} = 25.5$  Hz),

77.10, 73.12; HRMS (ESI): Exact mass calcd for C<sub>15</sub>H<sub>12</sub>F<sub>2</sub>N<sub>2</sub>O [M+H]<sup>+</sup> 275.0990, found 275.0989.

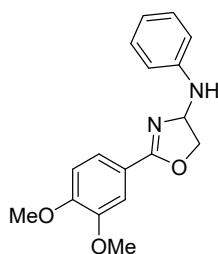

**2-(3,4-Dimethoxyphenyl)-N-phenyl-4,5-dihydrooxazol-4-amine (3k).** Prepared according to the general procedure 1 using 3,4-dimethoxy-*N*-vinylbenzamide (62.2 mg, 0.300 mmol) over 18 hours. Flash column chromatography (SiO<sub>2</sub>, 0-30% ethyl acetate in hexanes) yielded a solid (24.8 mg, 27%). *R*<sub>f</sub> = 0.26 (70% EtOAc/hexanes); <sup>1</sup>H NMR (400 MHz, CDCl<sub>3</sub>) δ 7.58 (dd, *J* = 8.4, 1.9 Hz, 1H), 7.52 (d, *J* = 2.0 Hz, 1H), 7.23 (dd, *J* = 8.6, 7.4 Hz, 2H), 6.88 (d, *J* = 8.4 Hz, 1H), 6.81 (tt, *J* = 7.4, 1.1 Hz, 1H), 6.74 (dd, *J* = 7.4, 1.1 Hz, 2H), 5.81 (td, *J* = 7.9, 5.9 Hz, 1H), 4.65 (dd, *J* = 9.3, 8.3 Hz, 1H), 4.20 (dd, *J* = 9.3, 6.0 Hz, 1H), 4.14 – 4.07 (m, 1H), 3.93 (d, *J* = 1.7 Hz, 6H); <sup>13</sup>C NMR (101 MHz, CDCl<sub>3</sub>) δ 165.90, 152.24, 148.83, 145.90, 129.54 (2C), 122.28, 120.00, 118.95, 114.22 (2C), 111.21, 110.54, 77.37, 73.41, 56.17, 56.10; HRMS (ESI): Exact mass calcd for C<sub>17</sub>H<sub>18</sub>N<sub>2</sub>O<sub>3</sub> [M+H]<sup>+</sup> 299.1390, found 299.1390.

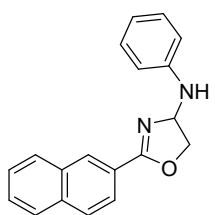

**2-(Naphthalen-2-yl)-N-phenyl-4,5-dihydrooxazol-4-amine (3l).** Prepared according to the general procedure 2 using *N*-vinyl-2-naphthamide (118 mg, 0.600 mmol) over 18 hours. Flash column chromatography (SiO<sub>2</sub>, 0-30% ethyl acetate in hexanes) yielded a solid (33.2 mg, 32%). *R*<sub>f</sub> = 0.29 (70% EtOAc/hexanes); <sup>1</sup>H NMR (400 MHz, CDCl<sub>3</sub>) δ 8.51 (t, *J* = 1.1 Hz, 1H), 8.07 (dd, *J* = 8.6, 1.7 Hz, 1H), 7.92 (d, *J* = 8.0 Hz, 1H), 7.87 (d, *J* = 8.6 Hz, 2H), 7.55 (dddd, *J* = 14.7, 8.3, 6.9, 1.5 Hz, 2H), 7.29 – 7.20 (m, 2H), 6.87 – 6.75 (m, 3H), 5.90 (dd, *J* = 8.4, 6.2 Hz, 1H), 4.73 (dd, *J* = 9.3, 8.4 Hz, 1H), 4.27 (dd, *J* = 9.3, 6.2 Hz, 1H); <sup>13</sup>C NMR (101 MHz, CDCl<sub>3</sub>) δ 166.12, 145.88, 135.09, 132.75, 129.58 (2C), 129.46, 129.13, 128.32, 127.94, 127.90, 126.76, 125.07, 124.76, 119.07, 114.30 (2C), 77.23, 73.41; HRMS (ESI): Exact mass calcd for C<sub>19</sub>H<sub>16</sub>N<sub>2</sub>O [M+H]<sup>+</sup> 289.1335, found 289.1333.

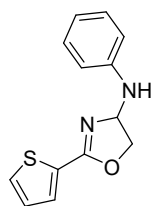

***N*-Phenyl-2-(thiophen-2-yl)-4,5-dihydrooxazol-4-amine (3m).** Prepared according to the general procedure 1 using *N*-vinylthiophene-2-carboxamide (46.0 mg, 0.300 mmol) over 18 hours. Flash column chromatography (SiO<sub>2</sub>, 0-30% ethyl acetate in hexanes) yielded a solid (45.4 mg, 62%). *R*<sub>f</sub> = 0.22 (70% EtOAc/hexanes); <sup>1</sup>H NMR (400 MHz, CDCl<sub>3</sub>) δ 7.68 (dd, *J* = 3.8, 1.1 Hz, 1H), 7.50 (dd, *J* = 5.0, 1.2 Hz, 1H), 7.28 – 7.17 (m, 2H), 7.10 (ddd, *J* = 4.7, 3.7, 0.8 Hz, 1H), 6.81 (td, *J* = 7.4, 1.1 Hz, 1H), 6.73 (d, *J* = 8.5 Hz, 2H), 5.81 (q, *J* = 7.3 Hz, 1H), 4.65 (ddd, *J* = 9.1, 8.2, 0.8 Hz, 1H), 4.21 (ddd, *J* = 9.2, 6.0, 0.8 Hz, 1H), 4.10 (d, *J* = 7.5 Hz, 1H); <sup>13</sup>C NMR (101 MHz, CDCl<sub>3</sub>) δ 161.75, 145.76, 131.37, 130.79, 129.92, 129.55 (2C), 127.87, 119.07, 114.24 (2C), 77.29, 73.73; HRMS (ESI): Exact mass calcd for C<sub>13</sub>H<sub>12</sub>N<sub>2</sub>OS [M+H]<sup>+</sup> 245.0743, found 245.0742.

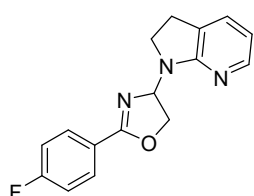

**4-(2,3-Dihydro-1*H*-pyrrolo[2,3-*b*]pyridin-1-yl)-2-(4-fluorophenyl)-4,5-dihydrooxazole (7a).** Prepared according to the general procedure 1 using 4-fluoro-*N*-vinylbenzamide (49.6 mg, 0.300 mmol) over 18 hours. Flash column chromatography (SiO<sub>2</sub>, 0-30% ethyl acetate in hexanes) yielded a solid (65.1 mg, 77%). *R*<sub>f</sub> = 0.32 (70% EtOAc/hexanes); <sup>1</sup>H NMR (400 MHz, CDCl<sub>3</sub>) δ 8.03 – 7.97 (m, 2H), 7.91 (ddt, *J* = 5.3, 1.7, 0.9 Hz, 1H), 7.22 (dq, *J* = 7.1, 1.4 Hz, 1H), 7.12 – 7.05 (m, 2H), 6.62 (dd, *J* = 9.2, 5.6 Hz, 1H), 6.52 (dd, *J* = 7.1, 5.3 Hz, 1H), 4.53 (t, *J* = 9.4 Hz, 1H), 4.41 (dd, *J* = 9.6, 5.6 Hz, 1H), 3.48 – 3.40 (m, 1H), 3.40 – 3.34 (m, 1H), 3.00 – 2.93 (m, 2H); <sup>13</sup>C NMR (101 MHz, CDCl<sub>3</sub>) δ 165.09 (t, *J*<sub>C-F</sub> = 125.95 Hz), 162.17, 146.05, 131.68, 131.08, 130.99, 123.57, 123.53, 123.34, 115.76, 115.54, 113.81, 76.03, 69.45, 43.44, 25.75; HRMS (ESI): Exact mass calcd for C<sub>16</sub>H<sub>14</sub>FN<sub>3</sub>O [M+H]<sup>+</sup> 284.1194, found 284.1193.

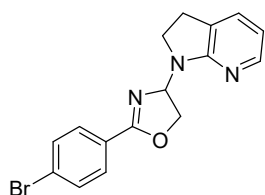
**2-(4-Bromophenyl)-4-(2,3-dihydro-1H-pyrrolo[2,3-b]pyridin-1-yl)-4,5-**

**dihydrooxazole (7c).** Prepared according to the general procedure 1 using 4-bromo-*N*-vinylbenzamide (67.8 mg, 0.300 mmol) over 18 hours. Flash column chromatography (SiO<sub>2</sub>, 0-30% ethyl acetate in hexanes) yielded a solid (70.2 mg, 68%). *R<sub>f</sub>* = 0.36 (70% EtOAc/hexanes); <sup>1</sup>H NMR (400 MHz, CDCl<sub>3</sub>) δ 7.91 (ddt, *J* = 5.3, 1.8, 1.0 Hz, 1H), 7.86 (dt, *J* = 8.6, 2.3, 1.9 Hz, 2H), 7.55 (dt, *J* = 8.7, 2.3 Hz, 2H), 7.22 (dq, *J* = 7.1, 1.4 Hz, 1H), 6.61 (dd, *J* = 9.2, 5.7 Hz, 1H), 6.52 (dd, *J* = 7.1, 5.3 Hz, 1H), 4.52 (t, *J* = 9.4 Hz, 1H), 4.41 (dd, *J* = 9.6, 5.7 Hz, 1H), 3.44 (td, *J* = 8.9, 6.1 Hz, 1H), 3.39 – 3.32 (m, 1H), 3.00 – 2.93 (m, 2H); <sup>13</sup>C NMR (101 MHz, CDCl<sub>3</sub>) δ 165.18, 162.13, 146.04, 131.78 (2C), 131.70, 130.24 (2C), 126.66, 126.23, 123.31, 113.86, 76.06, 69.43, 43.46, 25.74; HRMS (ESI): Exact mass calcd for C<sub>16</sub>H<sub>14</sub>BrN<sub>3</sub>O [M+H]<sup>+</sup> 344.0393, found 344.0393.

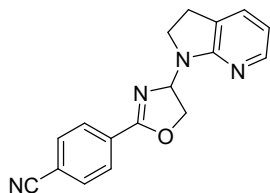
**2-(4-Cyanophenyl)-4-(2,3-dihydro-1H-pyrrolo[2,3-b]pyridin-1-yl)-4,5-**

**dihydrooxazole (7e).** Prepared according to the general procedure 1 using 4-cyano-*N*-vinylbenzamide (51.6 mg, 0.300 mmol) over 18 hours. Flash column chromatography (SiO<sub>2</sub>, 0-30% ethyl acetate in hexanes) yielded a solid (47.0 mg, 54%). *R<sub>f</sub>* = 0.37 (30% EtOAc/hexanes); <sup>1</sup>H NMR (400 MHz, CDCl<sub>3</sub>) δ 8.10 (dt, *J* = 8.4, 1.7 Hz, 2H), 7.92 (dq, *J* = 5.3, 1.1 Hz, 1H), 7.70 (dt, *J* = 8.7, 1.6 Hz, 2H), 7.24 (dq, *J* = 7.1, 1.4 Hz, 1H), 6.64 (dd, *J* = 9.3, 5.9 Hz, 1H), 6.54 (dd, *J* = 7.1, 5.3 Hz, 1H), 4.57 (t, *J* = 9.5 Hz, 1H), 4.47 (dd, *J* = 9.7, 5.9 Hz, 1H), 3.46 (td, *J* = 8.7, 6.3 Hz, 1H), 3.35 (q, *J* = 9.1 Hz, 1H), 3.03 – 2.93 (m, 2H); <sup>13</sup>C NMR (101 MHz, CDCl<sub>3</sub>) δ 164.32, 162.03, 146.07, 132.26 (2C), 131.80, 131.44, 129.27, 123.26 (2C), 118.28, 115.29, 114.07, 76.26, 69.60, 43.68, 25.77; HRMS (ESI): Exact mass calcd for C<sub>17</sub>H<sub>14</sub>N<sub>4</sub>O [M+H]<sup>+</sup> 291.1240, found 291.1239.

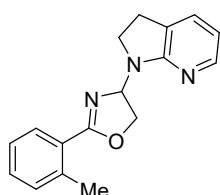
**4-(2,3-Dihydro-1H-pyrrolo[2,3-b]pyridin-1-yl)-2-(*o*-tolyl)-4,5-dihydrooxazole (7h).**

Prepared according to the general procedure 1 using 2-methyl-*N*-vinylbenzamide (48.4 mg, 0.300 mmol) over 18 hours. Flash column chromatography (SiO<sub>2</sub>, 0-30% ethyl acetate in hexanes) yielded a solid (55.2 mg, 66%). *R<sub>f</sub>* = 0.40 (70% EtOAc/hexanes); <sup>1</sup>H NMR (400 MHz, CDCl<sub>3</sub>) δ 7.91 (ddt, *J* = 5.3, 1.8, 1.0 Hz, 1H), 7.83 (dd, *J* = 7.7, 1.5 Hz, 1H), 7.35 (td, *J* = 7.5, 1.5 Hz, 1H), 7.25 – 7.19 (m, 3H), 6.60 (dd, *J* = 9.2, 5.6 Hz, 1H), 6.51 (dd, *J* = 7.0, 5.3 Hz, 1H), 4.49 (t, *J* = 9.4 Hz, 1H), 4.37 (dd, *J* = 9.6, 5.7 Hz, 1H), 3.49 – 3.42 (m, 2H), 3.02 – 2.94 (m, 2H), 2.58 (s, 3H); <sup>13</sup>C NMR (101 MHz, CDCl<sub>3</sub>) δ 166.78, 162.20, 145.98, 139.12, 131.55, 131.35, 131.00, 130.18, 126.95, 125.69, 123.38, 113.65, 76.49, 68.80, 43.78, 25.80, 21.92; HRMS (ESI): Exact mass calcd for C<sub>17</sub>H<sub>17</sub>N<sub>3</sub>O [M+H]<sup>+</sup> 280.1444, found 280.1444.

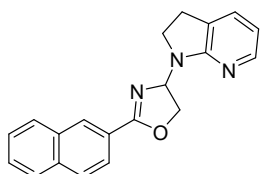
**4-(2,3-dihydro-1H-pyrrolo[2,3-b]pyridin-1-yl)-2-(naphthalen-2-yl)-4,5-**

**dihydrooxazole (7l).** Prepared according to the general procedure 1 using *N*-vinyl-2-naphthamide (59.2 mg, 0.300 mmol) over 18 hours. Flash column chromatography (SiO<sub>2</sub>, 0-30% ethyl acetate in hexanes) yielded a solid (70.0 mg, 74%). *R<sub>f</sub>* = 0.40 (50% EtOAc/hexanes); <sup>1</sup>H NMR (400 MHz, CDCl<sub>3</sub>) δ 8.52 (s, 1H), 8.08 (dd, *J* = 8.6, 1.6, 1H), 7.94 (dd, *J* = 5.3, 0.7, 1H), 7.91 (d, *J* = 7.7, 1H), 7.86 (d, *J* = 8.6, 2H), 7.57 – 7.49 (m, 2H), 7.22 (dd, *J* = 7.0, 1.4, 1H), 6.69 (dd, *J* = 9.1, 5.6, 1H), 6.52 (dd, *J* = 7.0, 5.3, 1H), 4.59 (t, *J* = 9.3, 1H), 4.47 (dd, *J* = 9.5, 5.6, 1H), 3.50 – 3.41 (m, 2H), 3.00 – 2.95 (m, 2H); <sup>13</sup>C NMR (100 MHz, CDCl<sub>3</sub>) δ 166.1, 162.2, 146.1, 135.0, 132.8, 131.6, 129.4, 129.1, 128.2, 127.9, 127.8, 126.7, 125.1, 124.6, 123.4, 113.8, 76.1, 69.4, 43.4, 25.8; HRMS (ESI): Exact mass calcd for C<sub>20</sub>H<sub>17</sub>N<sub>3</sub>O [M+H]<sup>+</sup> 316.1444, found 316.1445.

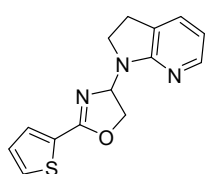
**4-(2,3-dihydro-1H-pyrrolo[2,3-b]pyridin-1-yl)-2-(thiophen-2-yl)-4,5-dihydrooxazole**

**(7m).** Prepared according to the general procedure 1 using *N*-vinylthiophene-2-carboxamide

(46.0 mg, 0.300 mmol) over 18 hours. Flash column chromatography (SiO<sub>2</sub>, 0-30% ethyl acetate in hexanes) yielded a solid (44.0 mg, 54%).  $R_f = 0.30$  (50% EtOAc/hexanes); <sup>1</sup>H NMR (400 MHz, CDCl<sub>3</sub>)  $\delta$  7.90 (d,  $J = 5.2$ , 1H), 7.69 (dd,  $J = 3.7$ , 1.1, 1H), 7.49 (dd,  $J = 5.0$ , 1.1, 1H), 7.22 (dd,  $J = 7.0$ , 1.3, 1H), 7.09 (dd,  $J = 5.0$ , 3.8, 1H), 6.61 (dd,  $J = 9.0$ , 5.6, 1H), 6.51 (dd,  $J = 7.0$ , 5.3, 1H), 4.52 (t,  $J = 9.3$ , 1H), 4.39 (dd,  $J = 9.5$ , 5.6, 1H), 3.47 – 3.40 (m, 2H), 3.04 – 2.91 (m, 2H); <sup>13</sup>C NMR (100 MHz, CDCl<sub>3</sub>)  $\delta$  162.1, 161.6, 146.0, 131.6, 131.2, 130.6, 129.9, 127.8, 123.3, 113.8, 76.2, 69.7, 43.4, 25.8; HRMS (ESI): Exact mass calcd for C<sub>14</sub>H<sub>13</sub>N<sub>3</sub>OS [M+H]<sup>+</sup> 272.0852, found 272.0853.

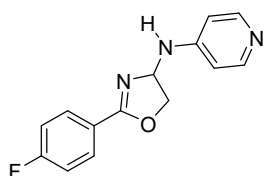

**2-(4-Fluorophenyl)-N-(pyridin-4-yl)-4,5-dihydrooxazol-4-amine (8a).** Prepared according to the general procedure 1 using 4-fluoro-*N*-vinylbenzamide (49.6 mg, 0.300 mmol) over 18 hours. Flash column chromatography (SiO<sub>2</sub>, 0-5% methanol in dichloromethane) yielded a solid (40.6 mg, 53%).  $R_f = 0.32$  (5% MeOH/DCM); <sup>1</sup>H NMR (400 MHz, DMSO-*d*<sub>6</sub>)  $\delta$  8.27 (s, 1H), 8.17 (dt,  $J = 7.6$ , 2.9, 1.8 Hz, 2H), 8.10 – 8.01 (m, 2H), 7.41 (tt,  $J = 9.0$ , 8.9, 2.1 Hz, 2H), 6.84 (dt,  $J = 7.6$ , 2.9, 1.7 Hz, 2H), 6.60 (dd,  $J = 9.0$ , 5.2 Hz, 1H), 4.91 (dd,  $J = 11.0$ , 9.0 Hz, 1H), 4.65 (dd,  $J = 11.0$ , 5.2 Hz, 1H); <sup>13</sup>C NMR (101 MHz, DMSO)  $\delta$  167.95, 166.25, 163.75, 159.70, 140.77 (2C), 131.77, 131.67, 122.51 (d,  $J_{C-F} = 3.0$  Hz), 116.39, 116.16, 109.67 (2C), 86.16, 73.38; HRMS (ESI): Exact mass calcd for C<sub>14</sub>H<sub>12</sub>FN<sub>3</sub>O [M+H]<sup>+</sup> 258.1037, found 258.1038.

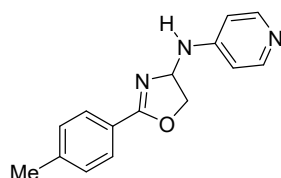

**N-(Pyridin-4-yl)-2-(*p*-tolyl)-4,5-dihydrooxazol-4-amine (8b).** Prepared according to the general procedure 1 using 4-methyl-*N*-vinylbenzamide (48.4 mg, 0.300 mmol) over 18 hours. Flash column chromatography (SiO<sub>2</sub>, 0-5% methanol in dichloromethane) yielded a solid (44.4 mg, 58%).  $R_f = 0.32$  (5% MeOH/DCM); <sup>1</sup>H NMR (400 MHz, DMSO-*d*<sub>6</sub>)  $\delta$  8.26 (s, 1H), 8.17 (dt,  $J = 7.5$ , 2.9, 1.8 Hz, 2H), 7.92 – 7.85 (m, 2H), 7.37 (d,  $J = 8.0$  Hz, 2H), 6.85 (dt,  $J = 7.5$ , 2.8, 1.9 Hz, 2H), 6.60 (dd,  $J = 8.9$ , 5.1 Hz, 1H), 4.89 (dd,  $J = 11.0$ , 9.0 Hz, 1H), 4.64 (dd,  $J = 10.9$ , 5.2 Hz, 1H), 2.39 (s, 3H); <sup>13</sup>C NMR (101 MHz, DMSO)  $\delta$  168.73, 159.57, 143.39, 140.60 (2C), 129.48 (2C), 128.78 (2C), 122.99, 109.57 (2C), 86.06, 73.00, 21.25; HRMS (ESI): Exact mass calcd for C<sub>15</sub>H<sub>15</sub>N<sub>3</sub>O [M+H]<sup>+</sup> 254.1288, found 254.1288.

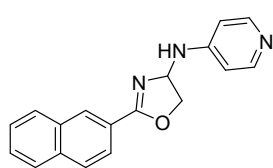

**2-(naphthalen-2-yl)-N-(pyridin-4-yl)-4,5-dihydrooxazol-4-amine (8l).** Prepared according to the general procedure 1 using *N*-vinyl-2-naphthamide (59.2 mg, 0.300 mmol) over 18 hours. Flash column chromatography (SiO<sub>2</sub>, 0-10% methanol in dichloromethane) yielded a solid (71.0 mg, 82%).  $R_f = 0.20$  (5% MeOH/DCM); <sup>1</sup>H NMR (400 MHz, MeOD-*d*<sub>4</sub>)  $\delta$  8.65 (s, 1H), 8.19 (d,  $J = 7.6$ , 2H), 8.09 (dd,  $J = 8.6$ , 1.7, 1H), 8.03 – 7.95 (m, 3H), 7.67 – 7.59 (m, 2H), 6.90 (d,  $J = 7.6$ , 2H), 6.67 (dd,  $J = 9.0$ , 5.3, 1H), 5.05 (dd,  $J = 11.0$ , 9.0, 1H), 4.73 (dd,  $J = 11.0$ , 5.3, 1H); <sup>13</sup>C NMR (100 MHz, MeOD-*d*<sub>4</sub>)  $\delta$  171.9, 161.8, 141.6 (2C), 137.0, 134.0, 131.6, 130.2, 129.8, 129.7, 129.0, 128.2, 125.7, 124.2, 111.0 (2C), 88.2, 74.7; HRMS (ESI): Exact mass calcd for C<sub>18</sub>H<sub>15</sub>N<sub>3</sub>O [M+H]<sup>+</sup> 290.1288, found 290.1290.

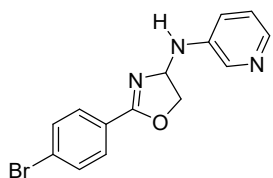

**2-(4-Bromophenyl)-N-(pyridin-3-yl)-4,5-dihydrooxazol-4-amine (9c).** Prepared according to the general procedure 1 using 4-bromo-*N*-vinylbenzamide (67.8 mg, 0.300 mmol) over 18 hours. Flash column chromatography (SiO<sub>2</sub>, 0-5% methanol in dichloromethane) yielded a solid (65.3 mg, 68%).  $R_f = 0.33$  (5% MeOH/DCM); <sup>1</sup>H NMR (400 MHz, DMSO-*d*<sub>6</sub>)  $\delta$  8.10 (t,  $J = 1.8$  Hz, 1H), 7.87 (dd,  $J = 3.4$ , 2.6 Hz, 1H), 7.81 (dt,  $J = 8.7$ , 2.5, 2.0 Hz, 2H), 7.68 (dt,  $J = 8.8$ , 2.3 Hz, 2H), 7.18 – 7.11 (m, 2H), 6.58 (d,  $J = 8.7$  Hz, 1H), 5.86 (td,  $J = 8.8$ , 6.6 Hz, 1H), 4.69 (t,  $J = 9.1$  Hz, 1H), 4.20 (dd,  $J = 9.3$ , 6.6 Hz, 1H); <sup>13</sup>C NMR (101 MHz, DMSO)  $\delta$  163.21, 143.06, 138.35, 136.40, 131.84 (2C), 129.99 (2C), 126.50, 125.61, 123.69, 119.36, 75.52,

71.67; HRMS (ESI): Exact mass calcd for C<sub>14</sub>H<sub>12</sub>BrN<sub>3</sub>O [M+H]<sup>+</sup> 318.0237, found 318.0238.

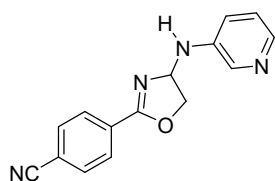

**4-(4-(Pyridin-3-ylamino)-4,5-dihydrooxazol-2-yl)benzonitrile (9e).** Prepared according to the general procedure 1 using 4-cyano-*N*-vinylbenzamide (51.6 mg, 0.300 mmol) over 18 hours. Flash column chromatography (SiO<sub>2</sub>, 0-5% methanol in dichloromethane) yielded a solid (53.1 mg, 67%). *R<sub>f</sub>* = 0.31 (5% MeOH/DCM); <sup>1</sup>H NMR (400 MHz, CDCl<sub>3</sub>) δ 8.18 (d, *J* = 2.6 Hz, 1H), 8.13 – 8.05 (m, 3H), 7.72 (dt, *J* = 8.4, 1.7 Hz, 2H), 7.20 – 7.10 (m, 2H), 5.88 (td, *J* = 8.6, 6.5 Hz, 1H), 4.75 (dd, *J* = 9.7, 8.7 Hz, 1H), 4.25 (dd, *J* = 9.7, 6.5 Hz, 1H), 4.18 (d, *J* = 8.6 Hz, 1H); <sup>13</sup>C NMR (101 MHz, CDCl<sub>3</sub>) δ 164.53, 141.75, 140.89, 137.43, 132.35 (2C), 131.41, 129.28 (2C), 124.00, 120.73, 73.13; HRMS (ESI): Exact mass calcd for C<sub>15</sub>H<sub>12</sub>N<sub>4</sub>O [M+H]<sup>+</sup> 265.1084, found 265.1086.

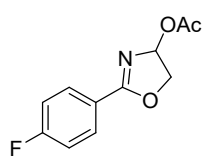

**2-(4-Fluorophenyl)-4,5-dihydrooxazol-4-yl acetate (10a).** Prepared according to the general procedure 3 using 4-fluoro-*N*-vinylbenzamide (49.6 mg, 0.300 mmol) over 18 hours. Flash column chromatography (SiO<sub>2</sub>, 0-30% ethyl acetate in hexanes) yielded a solid (33.4 mg, 50%). *R<sub>f</sub>* = 0.42 (90% EtOAc/hexanes); <sup>1</sup>H NMR (400 MHz, CDCl<sub>3</sub>) δ 8.10 – 8.00 (m, 2H), 7.17 – 7.07 (m, 2H), 6.65 (dd, *J* = 7.1, 4.2 Hz, 1H), 4.60 (dd, *J* = 10.8, 7.1 Hz, 1H), 4.35 (dd, *J* = 10.8, 4.2 Hz, 1H), 2.13 (s, 3H); <sup>13</sup>C NMR (101 MHz, CDCl<sub>3</sub>) δ 170.48, 168.45, 165.55 (d, *J*<sub>C-F</sub> = 253.6 Hz), 131.55, 131.46, 122.97, 122.93, 115.97, 115.75, 92.02, 73.34, 21.19; HRMS (ESI): Exact mass calcd for C<sub>11</sub>H<sub>10</sub>FNO<sub>3</sub> [M+H]<sup>+</sup> 224.0717, found 224.0717.

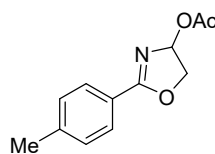

**2-(*p*-Tolyl)-4,5-dihydrooxazol-4-yl acetate (10b).** Prepared according to the general procedure 3 using 4-methyl-*N*-vinylbenzamide (48.4 mg, 0.300 mmol) over 18 hours. Flash column chromatography (SiO<sub>2</sub>, 0-30% ethyl acetate in hexanes) yielded a solid (30.6 mg, 46%). *R<sub>f</sub>* = 0.44 (90% EtOAc/hexanes); <sup>1</sup>H NMR (400 MHz, CDCl<sub>3</sub>) δ 7.92 (d, *J* = 8.2 Hz, 2H), 7.24 (dd, *J* = 8.0, 0.7 Hz, 2H), 6.65 (dd, *J* = 7.1, 4.1 Hz, 1H), 4.58 (dd, *J* = 10.8, 7.1 Hz, 1H), 4.33 (dd, *J* = 10.8, 4.2 Hz, 1H), 2.41 (s, 3H), 2.12 (s, 3H); <sup>13</sup>C NMR (101 MHz, CDCl<sub>3</sub>) δ 170.52, 169.47, 143.21, 129.30 (2C), 129.03 (2C), 123.84, 92.13, 73.08, 21.78, 21.19; HRMS (ESI): Exact mass calcd for C<sub>12</sub>H<sub>13</sub>NO<sub>3</sub> [M+H]<sup>+</sup> 220.0968, found 220.0968.

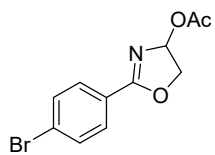

**2-(4-Bromophenyl)-4,5-dihydrooxazol-4-yl acetate (10c).** Prepared according to the general procedure 3 using 4-bromo-*N*-vinylbenzamide (67.8 mg, 0.300 mmol) over 18 hours. Flash column chromatography (SiO<sub>2</sub>, 0-30% ethyl acetate in hexanes) yielded a solid (42.8 mg, 50%). *R<sub>f</sub>* = 0.42 (90% EtOAc/hexanes); <sup>1</sup>H NMR (400 MHz, CDCl<sub>3</sub>) δ 7.90 (dt, *J* = 8.7, 2.3, 1.9 Hz, 2H), 7.59 (dt, *J* = 8.7, 2.3, 1.9 Hz, 2H), 6.65 (dd, *J* = 7.2, 4.3 Hz, 1H), 4.60 (dd, *J* = 10.8, 7.2 Hz, 1H), 4.35 (dd, *J* = 10.8, 4.3 Hz, 1H), 2.13 (s, 3H); <sup>13</sup>C NMR (101 MHz, CDCl<sub>3</sub>) δ 170.44, 168.57, 131.97 (2C), 130.57 (2C), 127.58, 125.63, 91.94, 73.33, 21.18; HRMS (ESI): Exact mass calcd for C<sub>11</sub>H<sub>10</sub>BrNO<sub>3</sub> [M+H]<sup>+</sup> 283.9917, found 283.9916.

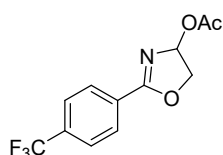

**2-(4-(Trifluoromethyl)phenyl)-4,5-dihydrooxazol-4-yl acetate (10d).** Prepared according to the general procedure 3 using 4-(trifluoromethyl)-*N*-vinylbenzamide (129 mg, 0.600 mmol) over 18 hours. Flash column chromatography (SiO<sub>2</sub>, 0-30% ethyl acetate in hexanes) yielded a solid (44.1 mg, 45%). *R<sub>f</sub>* = 0.37 (90% EtOAc/hexanes); <sup>1</sup>H NMR (400 MHz, CDCl<sub>3</sub>) δ 8.16 (dt, *J* = 8.1, 0.8, 0.7 Hz, 2H), 7.71 (dt, *J* = 8.1, 0.7 Hz, 2H), 6.69 (dd, *J* = 7.2, 4.3 Hz, 1H), 4.64 (dd, *J* = 10.8, 7.2 Hz, 1H), 4.39 (dd, *J* = 10.8, 4.3 Hz, 1H), 2.14 (s, 3H); <sup>13</sup>C NMR (101 MHz,

CDCl<sub>3</sub>)  $\delta$  170.24, 167.89, 134.03 (d,  $J_{C-F}$  = 32.7 Hz), 129.92, 129.35 (2C), 125.49 (q,  $J_{C-F}$  = 3.8 Hz), 124.98, 91.66, 77.33, 77.22, 77.02, 76.70, 73.26, 21.02; HRMS (ESI): Exact mass calcd for C<sub>12</sub>H<sub>10</sub>F<sub>3</sub>NO<sub>3</sub> [M+H]<sup>+</sup> 274.0686, found 274.0684.

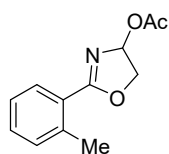

**2-(*o*-Tolyl)-4,5-dihydrooxazol-4-yl acetate (10g).** Prepared according to the general procedure 4 using 2-methyl-*N*-vinylbenzamide (96.8 mg, 0.600 mmol over 18 hours). Flash column chromatography (SiO<sub>2</sub>, 0-30% ethyl acetate in hexanes) yielded a solid (24.8 mg, 31%).  $R_f$  = 0.33 (90% EtOAc/hexanes); <sup>1</sup>H NMR (400 MHz, CDCl<sub>3</sub>)  $\delta$  7.90 (dd,  $J$  = 7.8, 1.5 Hz, 1H), 7.38 (td,  $J$  = 7.5, 1.5 Hz, 1H), 7.27 – 7.21 (m, 2H), 6.68 (dd,  $J$  = 7.2, 4.2 Hz, 1H), 4.54 (dd,  $J$  = 10.8, 7.2 Hz, 1H), 4.30 (dd,  $J$  = 10.8, 4.2 Hz, 1H), 2.63 (s, 3H), 2.13 (s, 3H); <sup>13</sup>C NMR (101 MHz, CDCl<sub>3</sub>)  $\delta$  170.51, 170.02, 139.81, 131.74, 131.62, 130.58, 125.98, 125.81, 92.35, 77.35, 72.36, 22.14, 21.24; HRMS (ESI): Exact mass calcd for C<sub>12</sub>H<sub>13</sub>NO<sub>3</sub> [M+H]<sup>+</sup> 220.0968, found 220.0968.

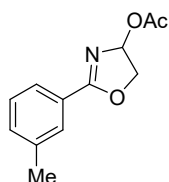

**2-(*m*-Tolyl)-4,5-dihydrooxazol-4-yl acetate (10i).** Prepared according to the general procedure 3 using 3-methyl-*N*-vinylbenzamide (48.4 mg, 0.300 mmol) over 18 hours. Flash column chromatography (SiO<sub>2</sub>, 0-30% ethyl acetate in hexanes) yielded a solid (32.4 mg, 50%).  $R_f$  = 0.42 (10% EtOAc/hexanes); <sup>1</sup>H NMR (400 MHz, CDCl<sub>3</sub>)  $\delta$  7.89 (tt,  $J$  = 1.7, 0.8 Hz, 1H), 7.85 – 7.78 (m, 1H), 7.37 – 7.29 (m, 2H), 6.66 (dd,  $J$  = 7.1, 4.2 Hz, 1H), 4.59 (dd,  $J$  = 10.8, 7.1 Hz, 1H), 4.35 (dd,  $J$  = 10.8, 4.2 Hz, 1H), 2.39 (d,  $J$  = 0.6 Hz, 3H), 2.12 (s, 3H); <sup>13</sup>C NMR (101 MHz, CDCl<sub>3</sub>)  $\delta$  170.55, 169.61, 138.45, 133.45, 129.70, 128.53, 126.55, 126.16, 92.07, 73.16, 21.38, 21.24; HRMS (ESI): Exact mass calcd for C<sub>12</sub>H<sub>13</sub>NO<sub>3</sub> [M+H]<sup>+</sup> 220.0968, found 220.0968.

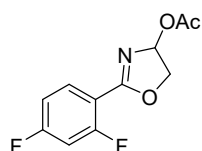

**2-(2,4-Difluorophenyl)-4,5-dihydrooxazol-4-yl acetate (10j).** Prepared according to the general procedure 3 using 2,4-difluoro-*N*-vinylbenzamide (124 mg, 0.600 mmol) over 18 hours. Flash column chromatography (SiO<sub>2</sub>, 0-30% ethyl acetate in hexanes) yielded a solid (24.5 mg, 26%).  $R_f$  = 0.39 (10% EtOAc/hexanes); <sup>1</sup>H NMR (400 MHz, CDCl<sub>3</sub>)  $\delta$  8.07 – 7.95 (m, 1H), 7.00 – 6.85 (m, 2H), 6.67 (dd,  $J$  = 7.2, 4.2 Hz, 1H), 4.58 (dd,  $J$  = 10.9, 7.2 Hz, 1H), 4.33 (dd,  $J$  = 10.8, 4.3 Hz, 1H), 2.12 (s, 3H); <sup>13</sup>C NMR (101 MHz, CDCl<sub>3</sub>)  $\delta$  170.42, 133.43, 133.32, 112.09, 111.87, 105.67, 105.41, 105.16, 91.68, 72.94, 21.16; HRMS (ESI): Exact mass calcd for C<sub>11</sub>H<sub>9</sub>F<sub>2</sub>NO<sub>3</sub> [M+H]<sup>+</sup> 242.0623, found 242.0621.

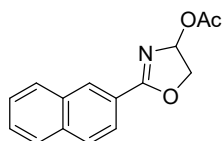

**2-(Naphthalen-2-yl)-4,5-dihydrooxazol-4-yl acetate (10l).** Prepared according to the general procedure 3 using *N*-vinyl-2-naphthamide (118 mg, 0.600 mmol) over 18 hours. Flash column chromatography (SiO<sub>2</sub>, 0-30% ethyl acetate in hexanes) yielded a solid (36.0 mg, 39%).  $R_f$  = 0.41 (10% EtOAc/hexanes); <sup>1</sup>H NMR (400 MHz, CDCl<sub>3</sub>)  $\delta$  8.58 (s, 1H), 8.10 (dd,  $J$  = 8.7, 1.7 Hz, 1H), 7.96 – 7.85 (m, 3H), 7.62 – 7.51 (m, 2H), 6.73 (dd,  $J$  = 7.1, 4.2 Hz, 1H), 4.67 (dd,  $J$  = 10.8, 7.1 Hz, 1H), 4.42 (dd,  $J$  = 10.7, 4.2 Hz, 1H), 2.15 (s, 3H); <sup>13</sup>C NMR (101 MHz, CDCl<sub>3</sub>)  $\delta$  170.55, 169.51, 135.40, 132.69, 130.20, 129.27, 128.45, 128.26, 127.98, 126.90, 125.07, 123.97, 92.14, 73.29, 21.24; HRMS (ESI): Exact mass calcd for C<sub>15</sub>H<sub>13</sub>NO<sub>3</sub> [M+H]<sup>+</sup> 256.0968, found 256.0966.

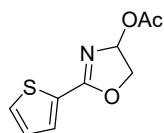

**2-(Thiophen-2-yl)-4,5-dihydrooxazol-4-yl acetate (10m).** Prepared according to the general procedure 3 using *N*-vinylthiophene-2-carboxamide (92.0 mg, 0.600 mmol) over 18 hours. Flash column chromatography (SiO<sub>2</sub>, 0-30% ethyl acetate in hexanes) yielded a solid (22.2 mg, 29%).  $R_f$  = 0.48 (10% EtOAc/hexanes); <sup>1</sup>H NMR (400 MHz, CDCl<sub>3</sub>)  $\delta$  7.57 (dd,  $J$  = 3.8, 1.2 Hz, 1H), 7.54 (dd,  $J$  = 5.0, 1.2 Hz, 1H), 7.21 – 7.07 (m, 2H), 4.75 (dd,  $J$  = 15.8, 1.0 Hz, 1H), 4.53 (d,  $J$  = 8.8 Hz, 1H),

*Hong et al.*

*Supporting Information*

1.56 (s, 3H);  $^{13}\text{C}$  NMR (101 MHz,  $\text{CDCl}_3$ )  $\delta$  176.49, 158.32, 138.20, 129.99, 128.49, 128.41, 128.09, 127.99, 20.91; HRMS was not detected by EI and FAB.
